# Supplementary material for: A new Andean treefrog (Amphibia: Hyloscirtus bogotensis group) from Ecuador: an example of community involvement for conservation
Source: PeerJ journal article supplement (doi:10.7717/peerj.11914), 2021-08-06
Supplement: Suplement._Mophologic_data_24.06.2021.xlsx [file Suplement._Mophologic_data_24.06.2021.xlsx]

## Sheet: Base de datos
		COLECCIÓN	NÚMERO	Tipo	ESPECIE	SEXO	Provincia	Localidad	SVL	HW	HL	NED	IND	IOD	EW	TD	ED	TL	HaL	FL
		DHMECN	15004	Paratipo	Hyloscirtus concientia sp. nov.	Macho	Carchi	Guapilal, Cerro Negro, Reservas Dracula	32.25	10.5	12.2	3.5	2.5	2.9	3	0.9	3.5	16.3	10.4	14
		DHMECN	15138	Paratipo	Hyloscirtus concientia sp. nov.	Macho	Carchi	Guapilal, Cerro Negro, Reservas Dracula	31.7	9.9	10.4	3	2.5	3.1	2.7	1.3	3.4	15.8	9.6	12.1
		DHMECN	15139	Paratipo	Hyloscirtus concientia sp. nov.	Macho	Carchi	Guapilal, Cerro Negro, Reservas Dracula	30.5	10.8	10.6	3.1	2.7	3.5	2.5	1.2	3.2	15.8	9	12.5
		DHMECN	15140	Paratipo	Hyloscirtus concientia sp. nov.	Macho	Carchi	Guapilal, Cerro Negro, Reservas Dracula	33.3	10	11.1	3.5	2.4	3.7	2.6	1	3.2	16.1	9.3	12.9
		DHMECN	13968	Paratipo	Hyloscirtus concientia sp. nov.	Macho	Carchi	El Pailón Cjhico, Reserva Dracula	29.6	10.2	11.1	3	2.9	3.3	2.2	1.1	3.5	15.4	9.2	12.8
		DHMECN	13969	Paratipo	Hyloscirtus concientia sp. nov.	Macho	Carchi	El Pailón Cjhico, Reserva Dracula	30.2	9.8	10.5	2.8	2.4	3	2.8	1.3	3.5	14.6	10	12.8
		DHMECN	13970	Paratipo	Hyloscirtus concientia sp. nov.	Macho	Carchi	El Pailón Cjhico, Reserva Dracula	30.6	9.9	10.8	3	2.3	2.8	2.2	1.5	3.1	15.2	8.8	12.1
		DHMECN	13971	Paratipo	Hyloscirtus concientia sp. nov.	Macho	Carchi	El Pailón Cjhico, Reserva Dracula	30.2	10	10.2	2.5	2.4	3.2	2.4	1.3	3.1	14.5	9.4	12.1
		DHMECN	13972	Paratipo	Hyloscirtus concientia sp. nov.	Macho	Carchi	El Pailón Cjhico, Reserva Dracula	30.6	10.3	10.5	2.8	2	3.3	2.2	1.1	2.7	15.2	9	12.2
		DHMECN	13973	Holotipo	Hyloscirtus concientia sp. nov.	Macho	Carchi	El Pailón Cjhico, Reserva Dracula	31.7	10.4	10.4	2.6	2.7	3.5	2.7	1.3	3.5	15.7	9.6	12.8
		DHMECN	13974	Paratipo	Hyloscirtus concientia sp. nov.	Macho	Carchi	El Pailón Cjhico, Reserva Dracula	31.4	10.2	10	2.9	2.6	3.1	2.4	1.5	3	14.1	9.6	13
		DHMECN	13975	Paratipo	Hyloscirtus concientia sp. nov.	Macho	Carchi	El Pailón Cjhico, Reserva Dracula	30.7	10.7	10.6	2.8	3	3.7	2.9	1.2	3.3	14.9	8.4	11.6
		DHMECN	13976	Paratipo	Hyloscirtus concientia sp. nov.	Macho	Carchi	El Pailón Cjhico, Reserva Dracula	30.5	10.2	11	3	2.4	3.6	3.1	1.4	3.4	15.1	8.8	12.2
		DHMECN	13977	Paratipo	Hyloscirtus concientia sp. nov.	Macho	Carchi	El Pailón Cjhico, Reserva Dracula	30.4	9.8	10.8	3.2	2.6	3.3	2.8	1.1	3.4	15.4	9.2	12.9
		DHMECN	4289	Topotipo	Hyloscirtus mashpi	Macho	Pichincha	Reserva Mashpi	31.4	9.8	10.3	2.4	2.1	3.4	2.1	1.3	3.5	17	9.7	13.1
		DHMECN	4290	Topotipo	Hyloscirtus mashpi	Macho	Pichincha	Reserva Mashpi	32.3	10.8	11.7	2.7	2.8	3.1	2.3	1.1	3.3	17.1	10.2	13
		DHMECN	4291	Topotipo	Hyloscirtus mashpi	Macho	Pichincha	Reserva Mashpi	30.1	10.3	10.8	3	2.5	3.4	2	0.9	3.5	16.6	10.4	13.1
		MZUTI	3747	Holotipo	Hyloscirtus mashpi	Macho	Pichincha	Reserva Mashpi	32.7	11	11.4	2.8	2.5	3.7	2.9	1.3	3.7	16.8	9.8	14.3
		MZUTI	606	Paratipo	Hyloscirtus mashpi	Macho	Pichincha	Reserva Mashpi	32	10.9	11.1	2.6	2.6	3.5	2.6	1.1	3.8	16.1	9.8	13.5
		MZUTI	609	Paratipo	Hyloscirtus mashpi	Macho	Pichincha	Reserva Mashpi	30.7	10.4	10.1	2.8	2.5	3.6	2.4	1.2	3.7	16	9.3	13.1
		MZUTI	610	Paratipo	Hyloscirtus mashpi	Macho	Pichincha	Reserva Mashpi	30.2	9.7	10.1	2.6	2.5	3.1	2.4	0.9	3.5	15.4	8.6	11.9
		MZUTI	613	Paratipo	Hyloscirtus mashpi	Macho	Pichincha	Reserva Mashpi	28.7	9.5	9.9	2.4	2.4	2.7	2	0.9	3.2	14	8.9	12.6
		MZUTI	614	Paratipo	Hyloscirtus mashpi	Macho	Pichincha	Reserva Mashpi	30.6	10.1	10.4	2.5	2.4	3.1	2.1	1	3.6	15.8	9	12.9
		MZUTI	3098	Paratipo	Hyloscirtus mashpi	Macho	Pichincha	Reserva Mashpi	31.7	9.7	11	2.5	2.6	3.2	2.5	1	3.8	15.7	9.4	13.1
		MZUTI	3762	Paratipo	Hyloscirtus mashpi	Macho	Pichincha	Reserva Mashpi	32	10.7	10.7	2.6	2.6	3.4	2.9	1	3.4	16	9.7	13.7
		MZUTI	3096	Paratipo	Hyloscirtus mashpi	Macho	Pichincha	Reserva Mashpi	31.9	10.6	11	2.8	2.5	3.4	2.7	1	3.9	16.4	9.7	13.4
		MZUTI	3748	Paratipo	Hyloscirtus mashpi	Macho	Pichincha	Reserva Mashpi	33.2	11	10.9	2.6	2.6	3.5	2.6	1.1	3.5	16.9	9.9	13.5
		DHMECN	4339		Hyloscirtus alytolylax	Macho	Pichincha	Las Tolas	33.7	10.98	11.66	2.98	2.63	3.96	2.61	1.56	3.6	16.67	11.13	15.51
		DHMECN	5877		Hyloscirtus alytolylax	Macho	Pichincha	Lloa Mindo- San Carlos	38.74	12.77	13.48	3.33	2.51	4.76	2.77	1.33	3.89	19.02	12.58	18.02
		DHMECN	7377		Hyloscirtus alytolylax	Macho	Pichincha	Saragoza Rio Cinto	34.21	11.67	12.42	2.81	2.46	4.38	2.43	1.35	3.22	17.97	10.99	15
		DHMECN	10314		Hyloscirtus alytolylax	Macho	Pichincha	Reserva las Gralarias	33.54	11.18	13.56	2.39	2.85	4.02	2.59	1.06	4.04	17.23	10.31	14.71
		QCAZ	67799		Hyloscirtus alytolylax	Macho	Pichincha	Reserva Maquipucuna	34.96	11.63	11.81	3.01	2.93	3.79	2.96	1.23	3.55	17.92	9.95	15.06
		QCAZ	67801		Hyloscirtus alytolylax	Macho	Pichincha	Reserva Maquipucuna	33.41	11.06	11.29	2.77	2.18	4.23	2.41	1.18	3.44	17.14	10.3	14.92
		QCAZ	67794		Hyloscirtus alytolylax	Macho	Pichincha	Reserva Maquipucuna	34.08	11.32	11.23	2.32	2.57	4.31	3.04	1.3	3.59	16.24	10.62	14.6
		QCAZ	67792		Hyloscirtus alytolylax	Macho	Pichincha	Reserva Maquipucuna	31.91	10.48	11.09	2.5	2.32	4.06	2.34	1.05	3.32	15.92	9.86	13.17
		QCAZ	67791		Hyloscirtus alytolylax	Macho	Pichincha	Reserva Maquipucuna	32.9	10.63	11.1	2.28	2.49	4.7	2.35	1.27	3.43	14.88	9.85	12.7
		QCAZ	67793		Hyloscirtus alytolylax	Macho	Pichincha	Reserva Maquipucuna	32.87	9.98	11.16	2.65	2.51	3.86	2.3	1.42	3.2	16	10.3	14.12
		QCAZ	67802		Hyloscirtus alytolylax	Macho	Pichincha	Reserva Maquipucuna	33.25	10.45	11.64	2.58	2.44	4.26	2.54	1.12	3.45	17.2	9.95	14.19
		QCAZ	67798		Hyloscirtus alytolylax	Macho	Pichincha	Reserva Maquipucuna	32.72	11.07	11.35	2.74	2.55	4.5	2.5	1.2	3.19	17.17	9.9	14.21
		QCAZ	67797		Hyloscirtus alytolylax	Macho	Pichincha	Reserva Maquipucuna	32.98	10.8	11.26	2.51	2.4	3.75	2.8	1.21	3.29	16.28	10.37	14.38
		QCAZ	67803		Hyloscirtus alytolylax	Macho	Pichincha	Reserva Maquipucuna	32.28	10.96	11.93	2.55	2.5	3.49	2.5	1.12	3.6	16.26	10.45	13.86
		QCAZ	67790		Hyloscirtus alytolylax	Macho	Pichincha	Reserva Maquipucuna	31.97	10.66	11.44	2.85	2.17	4.02	2.6	1.06	3.43	15.52	9.88	12.93
		DHMECN	1975		Hyloscirtus sp.1.	Macho	El Oro	Reserva Biológica Buenaventura	36.43	11.87	12.56	2.86	2.87	3.68	3.01	1.25	4.18	18.07	10.46	15.34
		DHMECN	1977		Hyloscirtus sp.1.	Macho	El Oro	Reserva Biológica Buenaventura	35.21	11.61	11.21	2.72	2.41	3.61	1.44	1.46	3.86	17.77	9.96	15.05
		DHMECN	2548		Hyloscirtus sp.1.	Macho	El Oro	Reserva Biológica Buenaventura	31.66	10.61	11.34	2.61	2.88	4.23	3.25	1.45	3.56	16.82	9.97	13.47
		DHMECN	3831		Hyloscirtus sp.1.	Macho	El Oro	Reserva Biológica Buenaventura	34.41	11.29	11.95	3	2.95	4.5	2.55	1.16	3.93	17.9	10.55	15.01
		DHMECN	9442		Hyloscirtus sp.1.	Macho	El Oro	Reserva Biológica Buenaventura	34.48	11.19	12.27	3.11	2.77	3.51	2.44	1.21	3.66	16.44	10.28	13.48
		DHMECN	10867		Hyloscirtus sp.1.	Macho	El Oro	Sendero Ñalacapac	36.32	11.59	13.07	3.34	2.74	4.08	2.06	1.23	3.51	18.87	10.21	15.78
		DHMECN	11510		Hyloscirtus sp.1.	Macho	El Oro	Cascadas de Manuel	35.51	11.81	13.61	2.93	2.24	4.48	2.04	1.36	3.91	18.55	10.6	14.54
		DHMECN	13795		Hyloscirtus sp.1.	Macho	El Oro	El Birón	35.17	12.35	13.02	2.68	2.87	4.74	2.78	1.47	3.76	19.49	11.69	16.21

## Sheet: Reciduals
	SVL	HW	HL	NED	IND	IOD	EW	TD	ED	TL	HaL	FL
	32.25	-0.13248	0.98452	0.71736	-0.039227	-0.73972	0.47752	-0.29451	0.020284	0.033996	0.57059	0.45709
	31.7	-0.56127	-0.60847	0.23613	-0.025736	-0.44125	0.18652	0.12121	-0.03981	-0.17891	-0.065298	-1.1372
	30.5	0.71226	0.04321	0.3771	0.2037	0.17359	0.0061481	0.055501	-0.15274	0.44748	-0.30724	-0.070162
	33.3	-0.95932	-0.5107	0.68151	-0.16498	-0.12771	0.060339	-0.22451	-0.3559	-0.71409	-0.84271	-1.2266
	29.6	0.39241	0.88197	0.30782	0.42577	0.13472	-0.27913	-0.018781	0.21256	0.51727	0.1613	0.73011
	30.2	-0.19435	0.056129	0.087339	-0.088944	-0.2727	0.31106	0.16407	0.16902	-0.59592	0.78227	0.39659
	30.6	-0.21887	0.20557	0.27368	-0.19876	-0.54431	-0.29549	0.35264	-0.26	-0.20472	-0.53708	-0.52575
	30.2	0.0056464	-0.24387	-0.21266	-0.088944	-0.0727	-0.088944	0.16407	-0.23098	-0.69592	0.18227	-0.30341
	30.6	0.18113	-0.09443	0.073684	-0.49876	-0.044314	-0.29549	-0.047357	-0.66	-0.20472	-0.33708	-0.42575
	31.7	-0.061273	-0.60847	-0.16387	0.17426	-0.041254	0.18652	0.12121	0.06019	-0.27891	-0.065298	-0.43719
	31.4	-0.16789	-0.89555	0.14637	0.081622	-0.38754	-0.10858	0.32978	-0.41804	-1.7223	0.024216	-0.070432
	30.7	0.55001	-0.032069	0.07027	0.49879	0.33778	0.40288	0.049785	-0.067255	-0.55692	-0.96692	-1.0813
	30.5	0.11226	0.44321	0.2771	-0.096302	0.27359	0.60615	0.2555	0.047256	-0.25252	-0.50724	-0.37016
	30.4	-0.25661	0.28085	0.48051	0.10615	-0.0085074	0.30778	-0.041642	0.054511	0.099678	-0.077402	0.38542
	31.4	-0.56789	-0.59555	-0.35363	-0.41838	-0.087543	-0.40858	0.12978	0.081956	1.1777	0.12422	0.029568
	32.3	0.15196	0.4657	-0.084351	0.25955	-0.54867	-0.2233	-0.095936	-0.18334	0.8079	0.35567	-0.5707
	30.1	0.33677	0.39377	0.29075	0.013509	0.1452	-0.48731	-0.23307	0.17628	1.4563	1.2121	0.75218
	32.7	0.22745	0.015139	0.0019941	-0.050265	-0.020289	0.37015	0.092633	0.18763	0.2991	-0.16368	0.50696
	32	0.34534	-0.021384	-0.17411	0.066905	-0.094964	0.081607	-0.087364	0.33842	-0.035506	0.045188	0.096054
	30.7	0.25001	-0.53207	0.07027	-0.0012079	0.23778	-0.097124	0.049785	0.33274	0.54308	-0.066917	0.41867
	30.2	-0.29435	-0.34387	-0.11266	0.011056	-0.1727	-0.088944	-0.23593	0.16902	0.20408	-0.61773	-0.50341
	28.7	-0.027434	0.020723	-0.26145	-0.052151	-0.30415	-0.4644	-0.19306	-0.022145	-0.41294	0.12985	1.0304
	30.6	-0.018866	-0.19443	-0.22632	-0.098755	-0.24431	-0.39549	-0.14736	0.24	0.39528	-0.33708	0.27425
	31.7	-0.76127	-0.0084651	-0.26387	0.074264	-0.34125	-0.013485	-0.17879	0.36019	-0.27891	-0.2653	-0.13719
	32	0.14534	-0.42138	-0.17411	0.066905	-0.19496	0.38161	-0.18736	-0.061577	-0.13551	-0.054812	0.29605
	31.9	0.076471	-0.083744	0.029304	-0.030642	-0.17706	0.18324	-0.18451	0.44568	0.31669	-0.024974	0.05164
	33.2	0.071807	-0.67306	-0.21507	0.037471	-0.30981	0.061975	-0.12165	-0.048643	0.13811	-0.21287	-0.57097
	33.7	-0.10383	-0.10126	0.14786	0.055206	0.060675	0.063794	0.32406	0.01508	-0.35289	0.86794	1.1611
	38.74	0.11732	-0.17829	0.3258	-0.18842	-0.041664	0.14134	-0.049966	-0.060597	-0.63372	0.8141	0.86959
	34.21	0.42741	0.46678	-0.039554	-0.1273	0.38937	-0.12455	0.099483	-0.40192	0.6809	0.57576	0.36761
	33.54	0.14597	1.859	-0.43668	0.27913	0.14932	0.046412	-0.17137	0.46669	0.29063	0.09568	0.45004
	34.96	0.15395	-0.42552	0.13484	0.3243	-0.33491	0.39318	-0.041949	-0.12634	0.2394	-0.68802	0.010722
	33.41	0.066438	-0.3621	-0.052244	-0.38768	0.3826	-0.13146	-0.047656	-0.12388	0.26849	0.12447	0.7323
	34.08	0.11788	-0.67429	-0.52512	-0.014114	0.34264	0.48758	0.053198	-0.022491	-0.98125	0.24455	0.039875
	31.91	-0.046642	0.0024918	-0.27104	-0.21089	0.48115	-0.17692	-0.13479	-0.13505	-0.16853	0.13204	-0.18392
	32.9	-0.20481	-0.36014	-0.52483	-0.065171	0.9439	-0.18312	0.056918	-0.096876	-1.7253	-0.17336	-1.2042
	32.87	-0.84547	-0.28885	-0.15381	-0.044435	0.10927	-0.23263	0.20778	-0.3247	-0.58964	0.2856	0.23246
	33.25	-0.49376	0.048121	-0.23678	-0.12376	0.44124	0.0011566	-0.10308	-0.10227	0.41201	-0.17779	0.091235
	32.72	0.29122	-0.042389	-0.058689	-0.00075553	0.77613	-0.030172	-0.0079383	-0.32382	0.65866	-0.069647	0.40584
	32.98	-0.059711	-0.23025	-0.29756	-0.15713	-0.020419	0.26557	-0.005368	-0.24268	-0.36706	0.32277	0.43132
	32.28	0.31818	0.70323	-0.23367	-0.039963	-0.15509	-0.022974	-0.075365	0.11811	-0.021664	0.61164	0.30041
	31.97	0.11468	0.32991	0.076915	-0.36236	0.43041	0.082098	-0.12651	-0.0294	-0.59985	0.13414	-0.45727
	36.43	-0.063627	-0.22882	-0.06534	0.22824	-0.70809	0.41913	-0.063955	0.397	-0.37792	-0.61664	-0.52639
	35.21	0.056135	-1.1196	-0.16369	-0.20183	-0.55967	-1.1309	0.18091	0.16552	-0.041095	-0.75262	-0.13824
	31.66	0.16118	0.34659	-0.1525	0.35524	0.69591	0.73717	0.27235	0.12309	0.86197	0.31664	0.25505
	34.41	-0.014842	-0.078498	0.14362	0.35779	0.47356	-0.0078217	-0.096232	0.29357	0.5065	0.076088	0.26644
	34.48	-0.13663	0.21515	0.25123	0.17607	-0.52897	-0.11897	-0.048232	0.018487	-0.99004	-0.2148	-1.3025
	36.32	-0.30939	0.32259	0.41841	0.10094	-0.2884	-0.52907	-0.080812	-0.26501	0.4795	-0.83382	-0.025242
	35.51	0.16275	1.1675	0.036067	-0.37919	0.25662	-0.53582	0.072335	0.19376	0.58231	-0.20213	-0.815
	35.17	0.80859	0.70544	-0.20233	0.25915	0.57749	0.20974	0.19205	0.068424	1.6998	0.98932	1.044

## Sheet: Results PCA
																					LOADINGS
		PC	Eigenvalue	% variance																		PC 1	PC 2	PC 3	PC 4	PC 5	PC 6	PC 7	PC 8	PC 9	PC 10	PC 11
		1	0.774859	39.381														pca1			HW	0.20728	-0.039829	0.11563	0.33942	0.26046	-0.39512	0.74047	0.093531	-0.064392	-0.20422	-0.0041123
		2	0.321671	16.348																	HL	0.36365	-0.2772	0.79021	-0.2281	-0.18199	-0.17486	-0.15316	-0.044141	-0.13533	0.063699	0.054667
		3	0.241927	12.295																	NED	-0.0043312	-0.093427	0.082997	-0.31115	0.19916	0.088631	-0.0088682	0.73943	0.49079	-0.22306	0.05065
		4	0.168372	8.5572																	IND	0.037503	-0.055284	0.091971	0.037526	0.37088	-0.033687	0.065007	-0.14312	0.43664	0.73981	-0.29033
		5	0.125822	6.3946																	IOD	0.13103	0.057463	0.12493	0.80219	-0.22786	-0.039709	-0.37838	0.18531	0.28828	-0.065065	-0.045537
		6	0.0929028	4.7216																	EW	0.0014943	0.11548	0.26451	0.19189	0.71125	0.43871	-0.20602	0.0074467	-0.34706	-0.12904	0.043901
		7	0.0799647	4.064																	TD	-0.017409	0.06092	-0.016531	0.095268	-0.010443	0.01662	0.075712	0.11345	-0.011664	0.38589	0.90477
		8	0.0770551	3.9162	95.6776																ED	0.081547	-0.056741	0.025114	-0.069391	0.19151	-0.019025	-0.067795	-0.6063	0.55434	-0.43031	0.28809
		9	0.0350741	1.7826																	TL	0.62551	-0.57726	-0.42938	0.046531	0.0258	0.28117	-0.019249	0.02237	-0.082437	0.036745	0.015363
		10	0.0288103	1.4642																	HaL	0.34742	0.49207	0.15975	-0.044192	-0.3019	0.5915	0.37139	-0.048638	0.15383	0.021348	-0.065327
		11	0.0211548	1.0752																	FL	0.53599	0.55756	-0.22469	-0.19029	0.18822	-0.4251	-0.29949	0.065796	-0.067596	0.01974	0.0062051
																						2.30968	0.183752	0.984511	0.669702	1.22509	0.32913	0.119617	0.385135	1.2154	0.215537	0.95834
																						39.381	16.348	12.295	8.5572	6.3946	4.7216	4.064	3.9162	1.7826	1.4642	1.0752
																						39.381	55.729	68.024	76.5812	82.9758	87.6974	91.7614	95.6776	97.4602	98.9244	99.9996
																					Morphological variable	Components
																						PC 1	PC 2	PC 3	PC 4
																					HW	0.20728	-0.039829	0.11563	0.33942
																					HL	0.36365	-0.2772	0.79021	-0.2281
																					NED	-0.0043312	-0.093427	0.082997	-0.31115
																					IND	0.037503	-0.055284	0.091971	0.037526
																					IOD	0.13103	0.057463	0.12493	0.80219
																					EW	0.0014943	0.11548	0.26451	0.19189
																					TD	-0.017409	0.06092	-0.016531	0.095268
																					ED	0.081547	-0.056741	0.025114	-0.069391
																					TL	0.62551	-0.57726	-0.42938	0.046531
																					HaL	0.34742	0.49207	0.15975	-0.044192
																					FL	0.53599	0.55756	-0.22469	-0.19029
																					Charge extraction sums
																					Total	2.30968	0.183752	0.984511	0.669702
																					% of Variance	39.381	16.348	12.295	8.5572
																					% accumulated	39.381	55.729	68.024	76.5812
																		PCA2
