# Supplementary material for: A new Andean treefrog (Amphibia: Hyloscirtus bogotensis group) from Ecuador: an example of community involvement for conservation
Source: PeerJ journal article supplement (doi:10.7717/peerj.11914), 2021-08-06
Supplement: Table_S1_SpeciesNamingCompetition_FullList.pdf [file Table_S1_SpeciesNamingCompetition_FullList.pdf]

Supplementary Table

## Species Naming Competition: Full List of Entries

This supplementary table contains all 622 unique entries submitted through the Reserva: The Youth Land Trust website to the species naming competition. These unedited entries were submitted in English and Spanish, and have been left in their original language. Entrants were encouraged but not required to submit a specific epithet in Latin, and educational information on the species naming process was provided on the competition website. Throughout the selection process, reviewers identified entries to receive recognition, denoted in this table by colored icons.

The designation “Contributor” includes all entries whose submissions support part of the final English and Spanish names, which came together through group discussion.

The designation “Junior Scientist” includes all entries submitted by children aged 12 and younger.

|    |                                                                                                                                                                                                                                                                                                                                                                                                                                                                                                     |
|----|-----------------------------------------------------------------------------------------------------------------------------------------------------------------------------------------------------------------------------------------------------------------------------------------------------------------------------------------------------------------------------------------------------------------------------------------------------------------------------------------------------|
| 1  | <b>Carchi Hope Frog</b> <i>Lucemrepleti (light-filled)</i>   A’liya Spinner, 17, USA                                                                                                                                                                                                                                              |
|    | 2020 has been a difficult year for everyone, but especially for youth. The discovery of the frog— and the reminder that science, wonder, and discovery is continuing— has been very uplifting. I think the name of the frog should reflect the circumstance and location that it was discovered during and in, and also the hope that it represents for the future of science and our stewardship of this planet.                                                                                   |
| 2  | <b>Ecuador</b> <i>Aequatoria</i>   Aaliyah Ali, 11, Canada                                                                                                                                                                                                                                                                                                                                                        |
|    | Hi, my name is Aaliyah and I am eleven years old. I love science and am learning about Biodiversity in class. I have always wanted to name a species of animals. My teacher saw this and thought it was a really good idea for me to try. And since frogs are my favourite animal it worked out pretty good.                                                                                                                                                                                        |
| 3  | <b>Tulcánian colour changing torrent frog</b> <i>Hylodes Mutatiopellus</i>   Aaron Harmsen, 16, Australia                                                                                                                                                                                                                 |
|    | The reason I chose this common name is because it includes its most unique feature alongside the genus and location. The reason I chose this as the scientific name is; - the term ‘hylodes’ is the genus of South American torrent frogs - the word ‘mutatio’ means changing and ‘pellis’ means skin, together these make the term ‘mutatiopellus’, or changing skin which again refers to its unique ability - In total, ‘Hylodes mutatiopellus’ displays the genus and said species of this frog |
| 4  | <b>Tulcán Speckled Frog</b> <i>Tulcán Transparent speckled frog</i>   Abby Allen, 11, American                                                                                                                                                                                                                            |
|    | It says where it is from and it signals its design of its body, I am unsure what to do for a scientific name.                                                                                                                                                                                                                                                                                                                                                                                       |
| 5  | <b>Zero Two Spots</b>   Abby Vigil, 13, USA                                                                                                                                                                                                                                                                                                                                                                                                                                                         |
|    | I like the character zero two and the frog has spots                                                                                                                                                                                                                                                                                                                                                                                                                                                |
| 6  | <b>Spotted leopard frog</b>   Abi Kuhn, 16, South Africa                                                                                                                                                                                                                                                                                                                                                                                                                                            |
|    | I gave him this name because he looks like a fighter even though he may be dangerous.                                                                                                                                                                                                                                                                                                                                                                                                               |
| 7  | <b>Kermit la rana Rene</b> <i>Sachatamia ranae</i>   Abigail Manosalvas, 13, Ecuador                                                                                                                                                                                                                                                                                                                                                                                                                |
|    | porque kermit es un personaje que hemos apreciado durante nuestra infancia aparte es algo parecida a esta ranita.                                                                                                                                                                                                                                                                                                                                                                                   |
| 8  | <b>Cacao Frog</b>   Abraham Alvarado, 20, Ecuador                                                                                                                                                                                                                                                                                                                                                                                                                                                   |
|    | because cacao is ingrained in ecuadorian society and the different products that are made with it are integral to the community                                                                                                                                                                                                                                                                                                                                                                     |
| 9  | <b>Sad frog</b> <i>Hylocritus estonia</i>   Abrham Damete, 15, USA                                                                                                                                                                                                                                                                                                                                                                                                                                  |
|    | The name sounded nice with the frog.                                                                                                                                                                                                                                                                                                                                                                                                                                                                |
| 10 | <b>Ecuador Olive Frog</b> <i>Ecuadorian Hylidae Frog</i>   Adam Watson, 11, Canada                                                                                                                                                                                                                                                                                                                               |
|    | Normal) I chose this name because First, The Frog is from Ecuador, Second, it came from the green & brown colors. Generally green & brown make an olive like color. Scientific) I chose this scientific name because it is from Ecuador, and because this species is related to the tree frog (Hylidae frog) .                                                                                                                                                                                      |

 = Winner  = Runner-Up  = Contributor  = Finalist  = Semi-Finalist  = Special Recognition  
 = Science & Research Award  = Creativity Award  = Inspiring Conservation Award  = Junior Scientist Award (12 & under)

## Species Naming Competition Full List of Entries

|    |                                                                                                                                                                                                                                                                                                                                                                                                                                                                                                                                                                                                                                                                                                                                                                                                                                                                                                                                                                                                                                                                                                                                                                                                                            |
|----|----------------------------------------------------------------------------------------------------------------------------------------------------------------------------------------------------------------------------------------------------------------------------------------------------------------------------------------------------------------------------------------------------------------------------------------------------------------------------------------------------------------------------------------------------------------------------------------------------------------------------------------------------------------------------------------------------------------------------------------------------------------------------------------------------------------------------------------------------------------------------------------------------------------------------------------------------------------------------------------------------------------------------------------------------------------------------------------------------------------------------------------------------------------------------------------------------------------------------|
| 11 | <b>Cloud Forest Torrent Frog</b> <i>nubessilva</i>   Adam Thai, 14, USA                                                                                                                                                                                                                                                                                                                                                                                                                                                                                                                                                                                                                                                                                                                                                                                                                                                                                                                                                                                                                                                                   |
|    | The name nubessilva evokes vibrant images of the cloud forest high in the Carchi province in northern Ecuador and honors the habitat in which the frog lives. The Cloud Forest Torrent Frog is an essential part of the ecosystem and its name reminds us of the urgent need to protect this unique habitat which is threatened by mining, deforestation and farming. The name is composed of nubes, meaning cloud, and silva, meaning forest. Nubessilva peers through the low clouds, past the wet mist and down to the leaves above the rushing stream where its tadpoles will swim. It grips the moss upon the bark of the tree trunk with its round toes which are quite different from the squared toes of the glass frogs with which it shares this habitat. The frog leaps to the slick, wet leaves which contain small pools of clear water in which it will lay its eggs. We must protect the endangered cloud forests to help ensure that the nubessilva tadpoles will survive!                                                                                                                                                                                                                                 |
| 12 | <b>lemur eyed frog</b> <i>lemur luscus ranae</i>   adam Kremer, 15, Canada                                                                                                                                                                                                                                                                                                                                                                                                                                                                                                                                                                                                                                                                                                                                                                                                                                                                                                                                                                                                                                                                                                                                                 |
|    | as soon as I saw the frog it reminded me of lemur eyes                                                                                                                                                                                                                                                                                                                                                                                                                                                                                                                                                                                                                                                                                                                                                                                                                                                                                                                                                                                                                                                                                                                                                                     |
| 13 | <b>Spotty frog</b> <i>Eastern spotted frog</i>   Adele Muir, 11, America                                                                                                                                                                                                                                                                                                                                                                                                                                                                                                                                                                                                                                                                                                                                                                                                                                                                                                                                                                                                                                                                  |
|    | I think that it a very simple name that also sound specific, but I also feel like it would be a good name that younger kids could also now they name and it wouldn't be hard for them to pronounce and also research.                                                                                                                                                                                                                                                                                                                                                                                                                                                                                                                                                                                                                                                                                                                                                                                                                                                                                                                                                                                                      |
| 14 | <b>Squinted eye</b>   Aditya Rastogi, 12, America                                                                                                                                                                                                                                                                                                                                                                                                                                                                                                                                                                                                                                                                                                                                                                                                                                                                                                                                                                                                                                                                                         |
|    | I choose this because the frog reminds me of someone squinting                                                                                                                                                                                                                                                                                                                                                                                                                                                                                                                                                                                                                                                                                                                                                                                                                                                                                                                                                                                                                                                                                                                                                             |
| 15 | <b>Dedos de Burbujas Rana Torrente</b> <i>Hyloscirtus Procuratorcolor</i>   Adria Latour, 15, Dominican Republic                                                                                                                                                                                                                                                                                                                                                                                                                                                                                                                                                                                                                                                                                                                                                                                                                                                                                                                                                                                                                        |
|    | For the common name, I chose to call the frog "Dedos de Brurbuja Rana Torrente," which in English would translate as "Bubble-Fingers TorrentFrog," because I wanted the name to sound silly, but represent the characteristics of the new frog. I wrote it in Spanish, for it's the language spoken in Ecuador where the frog is located. With calling it "Dedos de Burbujas (bubble fingers)" the name would represent the frog's unique round fingertips, like bubbles, that differentiate it from its neighbor frogs. In the same way, using the term bubbles also connects to the frog's correlation with water as they can stick in wet surfaces. I also included "Rana Torrente (TorrentFrog)" so the frog's name would easily identify the frog allowing scientists to know the frog is a Torrent Frog, which gives them more information on its characteristics. For the scientific name, after the general name "Hyloscirtus," I called the second part of the scientific name "Procuratorcolor" which is Latin for "controller of color," as one of the fascinating characteristics of the frog is its ability to camouflage in which in a way can be said as if their instincts control their color/appearance. |
| 16 | <b>Liguara Frog</b> <i>liguara ranae</i>   Adriana Aguilar, 15, United States of America                                                                                                                                                                                                                                                                                                                                                                                                                                                                                                                                                                                                                                                                                                                                                                                                                                                                                                                                                                                                                                                |
|    | Liguara is my last name (Aguilar) with re-assembled letters. This past month has been very hard for me, school-wise, health-wise, and familywise, therefore I decided to do something good for not only myself, but the science community. Now, I know that this name needs to be chosen by a group of scientists, and the chances of it being chosen are small, and if it doesn't, I'll still be very proud of myself for going out of my comfort zone and trying something new! Thank you for considering it, have a nice day!                                                                                                                                                                                                                                                                                                                                                                                                                                                                                                                                                                                                                                                                                           |
| 17 | <b>gary</b> <i>dyphorius</i>   Aida Abou tarie, 10, Canada                                                                                                                                                                                                                                                                                                                                                                                                                                                                                                                                                                                                                                                                                                                                                                                                                                                                                                                                                                                                                                                                              |
|    | it's nice and simple                                                                                                                                                                                                                                                                                                                                                                                                                                                                                                                                                                                                                                                                                                                                                                                                                                                                                                                                                                                                                                                                                                                                                                                                       |
| 18 | <b>Conjurer</b> <i>Hyloscirtus Adjurator</i>   Aidan Cissell, 15, American                                                                                                                                                                                                                                                                                                                                                                                                                                                                                                                                                                                                                                                                                                                                                                                                                                                                                                                                                                                                                                                              |
|    | There is someone I look up to that made a story called Hunter X Hunter by Yoshihiro Togashi, where there are six types of powers someone can have. One of them being conjurer. Some conjurers in the story can alter matter to make it look different. The frog can change its color to look a certain way. He is sick right now; he might not be able to finish the story. I wanted this to show how much the fans appreciate his work.                                                                                                                                                                                                                                                                                                                                                                                                                                                                                                                                                                                                                                                                                                                                                                                   |
| 19 | <b>Jelly Frog</b> <i>mucilaginous amura</i>   Aiden Vaughn, 12, USA                                                                                                                                                                                                                                                                                                                                                                                                                                                                                                                                                                                                                                                                                                                                                                                                                                                                                                                                                                                                                                                                                                                                                        |
|    | This frog's hands reminded me of those silly hand toys, and also of gummies, mucilaginous means having gelatinous consistency and it sounds pretty scientific.                                                                                                                                                                                                                                                                                                                                                                                                                                                                                                                                                                                                                                                                                                                                                                                                                                                                                                                                                                                                                                                             |
| 20 | <b>River trill frog</b> <i>Hyloscirtus orior</i>   Aisha Anver, 22, Sri Lanka                                                                                                                                                                                                                                                                                                                                                                                                                                                                                                                                                                                                                                                                                                                                                                                                                                                                                                                                                                                                                                                           |
|    | Beautiful by itself, the call of this frog is what really hooked me. I wanted to choose a name, both common and scientific, which emulated its trill since it also feels special to this species. I chose 'orior' as its Latin name for its dual meaning of 'rise' - since it's a new species- and 'river' to show its habit, and as a sound which mimics the frog's call. It is a word chosen to express this frog's origin and unique nature.                                                                                                                                                                                                                                                                                                                                                                                                                                                                                                                                                                                                                                                                                                                                                                            |

 = Winner  
  = Runner-Up  
  = Contributor  
  = Finalist  
  = Semi-Finalist  
  = Special Recognition  
 = Science & Research Award  
  = Creativity Award  
  = Inspiring Conservation Award  
  = Junior Scientist Award (12 & under)

## Species Naming Competition Full List of Entries

|    |                                                                                                                                                                                                                                                                                                                                                                                                                                                                                                                                                                                                                                                                                                                                                                                                                                                                                                                                                                                                                                                                                                                                                                                                                                                                                                                                                                                                                                                                                                                                                                                                                                                                                                                                                                                                                                                                                                                                                                                                                                                                                                       |
|----|-------------------------------------------------------------------------------------------------------------------------------------------------------------------------------------------------------------------------------------------------------------------------------------------------------------------------------------------------------------------------------------------------------------------------------------------------------------------------------------------------------------------------------------------------------------------------------------------------------------------------------------------------------------------------------------------------------------------------------------------------------------------------------------------------------------------------------------------------------------------------------------------------------------------------------------------------------------------------------------------------------------------------------------------------------------------------------------------------------------------------------------------------------------------------------------------------------------------------------------------------------------------------------------------------------------------------------------------------------------------------------------------------------------------------------------------------------------------------------------------------------------------------------------------------------------------------------------------------------------------------------------------------------------------------------------------------------------------------------------------------------------------------------------------------------------------------------------------------------------------------------------------------------------------------------------------------------------------------------------------------------------------------------------------------------------------------------------------------------|
| 21 | <b>Squinties</b> <i>squintious eyeballis</i>   Alan Ruiz, 16, USA                                                                                                                                                                                                                                                                                                                                                                                                                                                                                                                                                                                                                                                                                                                                                                                                                                                                                                                                                                                                                                                                                                                                                                                                                                                                                                                                                                                                                                                                                                                                                                                                                                                                                                                                                                                                                                                                                                                                                                                                                                     |
|    | Because the frog always seems to be squinting                                                                                                                                                                                                                                                                                                                                                                                                                                                                                                                                                                                                                                                                                                                                                                                                                                                                                                                                                                                                                                                                                                                                                                                                                                                                                                                                                                                                                                                                                                                                                                                                                                                                                                                                                                                                                                                                                                                                                                                                                                                         |
| 22 | <b>Round-toed freckle frog</b> <i>Hyloscirtus lentiviridi</i>   Alanis Ballans, 16, United Kingdom                                                                                                                                                                                                                                                                                                                                                                                                                                                                                                                                                                                                                                                                                                                                                                                                                                                                                                                                                                                                                                                                                                                                                                                                                                                                                                                                                                                                                                                                                                                                                                                                                                                                                                                                                                                                                                                                                                                                                                                                    |
|    | Freckles tend to come out more at certain times, hence the reference to freckles, and the round toes are a defining attribute. The scientific name comes from the Latin for freckles, lentiginos, and green, viridi.                                                                                                                                                                                                                                                                                                                                                                                                                                                                                                                                                                                                                                                                                                                                                                                                                                                                                                                                                                                                                                                                                                                                                                                                                                                                                                                                                                                                                                                                                                                                                                                                                                                                                                                                                                                                                                                                                  |
| 23 | <b>Rana de los Andes</b> <i>ranafiloxis</i>   Alejandra Solis, 14, Ecuador                                                                                                                                                                                                                                                                                                                                                                                                                                                                                                                                                                                                                                                                                                                                                                                                                                                                                                                                                                                                                                                                                                                                                                                                                                                                                                                                                                                                                                                                                                                                                                                                                                                                                                                                                                                                                                                                                                                                                                                                                            |
|    | yo escogí este nombre ya que como decía en la lectura que era una rana de la cordillera de los andes por esa razón yo escogí este nombre y el nombre científico escogí por que el nombre científico es de la rana y filoxis                                                                                                                                                                                                                                                                                                                                                                                                                                                                                                                                                                                                                                                                                                                                                                                                                                                                                                                                                                                                                                                                                                                                                                                                                                                                                                                                                                                                                                                                                                                                                                                                                                                                                                                                                                                                                                                                           |
| 24 | <b>Rana dedos bola</b>   Alejandro Heredia, 19, Ecuador                                                                                                                                                                                                                                                                                                                                                                                                                                                                                                                                                                                                                                                                                                                                                                                                                                                                                                                                                                                                                                                                                                                                                                                                                                                                                                                                                                                                                                                                                                                                                                                                                                                                                                                                                                                                                                                                                                                                                                                                                                               |
|    | Por la característica de sus dedos que es por lo que se las puede distinguir a simple vista                                                                                                                                                                                                                                                                                                                                                                                                                                                                                                                                                                                                                                                                                                                                                                                                                                                                                                                                                                                                                                                                                                                                                                                                                                                                                                                                                                                                                                                                                                                                                                                                                                                                                                                                                                                                                                                                                                                                                                                                           |
| 25 | <b>Ecuadorian camolard</b> <i>Hyloscirtus circumdigitend</i>   Alex Saddler, 12, USA                                                                                                                                                                                                                                                                                                                                                                                                                                                                                                                                                                                                                                                                                                                                                                                                                                                                                                                                                                                                                                                                                                                                                                                                                                                                                                                                                                                                                                                                                                                                                                                                                                                                                                                                                                                                                                                                                                                                                                                                                  |
|    | We have slowly started creating a Legion of Lard and we want to be forever memorialized in the name of an animal. LARD FOR LIFE!                                                                                                                                                                                                                                                                                                                                                                                                                                                                                                                                                                                                                                                                                                                                                                                                                                                                                                                                                                                                                                                                                                                                                                                                                                                                                                                                                                                                                                                                                                                                                                                                                                                                                                                                                                                                                                                                                                                                                                      |
| 26 | <b>Clouded pear</b>   Alex Neal, 16, English                                                                                                                                                                                                                                                                                                                                                                                                                                                                                                                                                                                                                                                                                                                                                                                                                                                                                                                                                                                                                                                                                                                                                                                                                                                                                                                                                                                                                                                                                                                                                                                                                                                                                                                                                                                                                                                                                                                                                                         |
|    | The skin pattern resembles that of a pear and the habitat of the frog is in the cloud forests                                                                                                                                                                                                                                                                                                                                                                                                                                                                                                                                                                                                                                                                                                                                                                                                                                                                                                                                                                                                                                                                                                                                                                                                                                                                                                                                                                                                                                                                                                                                                                                                                                                                                                                                                                                                                                                                                                                                                                                                         |
| 27 | <b>Miller's Torrent Frog</b> <i>Hyloscirtus molinarii</i>   Alexander Norris, 18, United Kingdom                                                                                                                                                                                                                                                                                                                                                                                                                                                                                                                                                                                                                                                                                                                                                                                                                                                                                                                                                                                                                                                                                                                                                                                                                                                                                                                                                                                                                                                                                                                                                                                                                                                                                                                                                                                                                                |
|    | Millers were historically known for their abnormally large thumbs from grinding flour, and this frog's characteristically rounded fingertips are evocative of that. Moreover, its connection with streams and running water as a torrent frog calls to mind the traditional watermill system of harvesting the energy of water flow - a simple efficient prototype of renewable energy whose example we would do well to follow.                                                                                                                                                                                                                                                                                                                                                                                                                                                                                                                                                                                                                                                                                                                                                                                                                                                                                                                                                                                                                                                                                                                                                                                                                                                                                                                                                                                                                                                                                                                                                                                                                                                                      |
| 28 | <b>Chameleon Frog</b>   Alexei Strauser, 7, USA                                                                                                                                                                                                                                                                                                                                                                                                                                                                                                                                                                                                                                                                                                                                                                                                                                                                                                                                                                                                                                                                                                                                                                                                                                                                                                                                                                                                                                                                                                                                                                                                                                                                                                                                                                                                                                                                                                                                                                    |
|    | I chose this name because it's skin can change colors.                                                                                                                                                                                                                                                                                                                                                                                                                                                                                                                                                                                                                                                                                                                                                                                                                                                                                                                                                                                                                                                                                                                                                                                                                                                                                                                                                                                                                                                                                                                                                                                                                                                                                                                                                                                                                                                                                                                                                                                                                                                |
| 29 | <b>Chocolate Chirper</b> <i>Scelerisque Thorax Laneus</i>   Alexis Chubb, 12, USA                                                                                                                                                                                                                                                                                                                                                                                                                                                                                                                                                                                                                                                                                                                                                                                                                                                                                                                                                                                                                                                                                                                                                                                                                                                                                                                                                                                                                                                                                                                                                                                                                                                                                                                                                          |
|    | These frogs seem so fantastical. What stunning beauties! Their eyes have gorgeous tinges of light brown and white, creating a visage of 'perfect sight'. Both genders have their tones of brown, and it makes me imagine... chocolate frogs. Though the females can sometimes have varying shades and sections of brown, their eyes maintain that aloursting (new made up word combining many complimentary words in one) Their eyes are chocolate drops, their bodies, creamy milk formations. The fact that mother nature thought up something so perfect, yet imperfect, is altogether out-of-this-world. Which, I guess it is! We all came from somewhere out there. Anyway, I believe this newly discovered species should be casually referred to as the (speckled (optional reference)) chocolate chirper. It'd be formally known, in Latin, as the scelerisque thorax laneus (only includes the english words 'chocolate' and 'chirper' in translation). These frogs deserve a name that relates to something spirit-raising, something people enjoy. However, they must be known for their unique appearance. Chocolate. A chocolate frog. A chocolate chirper. That's a true chirp. Now, many frogs do have a chirp. We can not only identify this new species by its chirp, but also by its color. These stages of identification are something that fascinates me. We may now welcome, however it will be named, this frog, to our wide books of knowledge that remain so bare. But please, as a side note, protect this frog. I'm so happy to see that section at the bottom of the page directing us to assist you, and how all kinds of people strive to assist you. It warms my heart. Since it's only just been identified, (meaning there must not be many of its kind) it deserves privacy and tranquil. Sometimes, at the end of the scientific method, you communicate, but not to everyone, as to not let some more irresponsible citizens know of a new frog to catch. I find comfort in the fact that you always think of the creature first. Thanks for communicating to us! |
| 30 | <b>Round toed George frog</b>   Alexis MacInnis, 15, Canada                                                                                                                                                                                                                                                                                                                                                                                                                                                                                                                                                                                                                                                                                                                                                                                                                                                                                                                                                                                                                                                                                                                                                                                                                                                                                                                                                                                                                                                                                                                                                                                                                                                                                                                                                                                                                                                                                                                                                                                                                                           |
|    | Because the frog seems to have very round toes and my boyfriend suggested the name George                                                                                                                                                                                                                                                                                                                                                                                                                                                                                                                                                                                                                                                                                                                                                                                                                                                                                                                                                                                                                                                                                                                                                                                                                                                                                                                                                                                                                                                                                                                                                                                                                                                                                                                                                                                                                                                                                                                                                                                                             |

 = Winner  
 = Runner-Up  
 = Contributor  
 = Finalist  
 = Semi-Finalist  
 = Special Recognition  
 = Science & Research Award  
 = Creativity Award  
 = Inspiring Conservation Award  
 = Junior Scientist Award (12 & under)

## Species Naming Competition Full List of Entries

|    |                                                                                                                                                                                                                                                                                                                                                                                                                                                                                                                                                                                                                                                                                                                                                                                                                                                                                                                                                                                                                                                |
|----|------------------------------------------------------------------------------------------------------------------------------------------------------------------------------------------------------------------------------------------------------------------------------------------------------------------------------------------------------------------------------------------------------------------------------------------------------------------------------------------------------------------------------------------------------------------------------------------------------------------------------------------------------------------------------------------------------------------------------------------------------------------------------------------------------------------------------------------------------------------------------------------------------------------------------------------------------------------------------------------------------------------------------------------------|
| 31 | <b>hulkspae yalusintus</b>   Aleysha Maya, 14, Ecuador                                                                                                                                                                                                                                                                                                                                                                                                                                                                                                                                                                                                                                                                                                                                                                                                                                                                                                                                                                                         |
|    | Principalmente yo decidí escoger este nombre común porque me inspiré en los superhéroes de Marvel como Hulk y Spiderman, ellos dos han sido los personajes favoritos de mi hermano desde que nació así que decidí unirlos a los dos nombres para dar un resultado del nombre común de la especie. las características que le asocie con los personajes y la especie son: HULK: es verde, fuerte, ambos tienen las yemas de los dedos redondas y su cuerpo es grande con cabeza pequeña, en el caso de Hulk es al revés cabeza pequeña con cuerpo grande. Spiderman: es pegajoso, puede sostenerse en un sitio sin ser separado fácilmente y el cambio de color en la especie como en el personaje ya que existen dos, de color rojo y negro. finalmente, la rana tiene en sus patas una sustancia que les permite sostenerse en cualquier superficie evitando caerse como una araña en este caso el superhéroe. adicionalmente decidí poner este nombre ya que es una manera de que los niños se sientan atraídos para un mejor aprendizaje. - |
| 32 | <b>Lilly Green Jumper</b>   Ali Reustle, Unspecified, USA                                                                                                                                                                                                                                                                                                                                                                                                                                                                                                                                                                                                                                                                                                                                                                                                                                                                                                                                                                                      |
|    | I chose this name because it is green and it jumps so high.                                                                                                                                                                                                                                                                                                                                                                                                                                                                                                                                                                                                                                                                                                                                                                                                                                                                                                                                                                                    |
| 33 | <b>Tulcán Spotted Color Changing Frog</b>   Alice Wood, 11, USA's                                                                                                                                                                                                                                                                                                                                                                                                                                                                                                                                                                                                                                                                                                                                                                                                                                                                                             |
|    | Well it was found in Tulcan, Ecuador, and it has spots and is able to change. It's also a frog so I think its a pretty good name.                                                                                                                                                                                                                                                                                                                                                                                                                                                                                                                                                                                                                                                                                                                                                                                                                                                                                                              |
| 34 | <b>Cute pear frog</b>   Alice Rauber, Unspecified, Sweden                                                                                                                                                                                                                                                                                                                                                                                                                                                                                                                                                                                                                                                                                                                                                                                                                                                                                                                                                                                      |
|    | It is cute, it looks like a pear, it is a frog. Simple as that                                                                                                                                                                                                                                                                                                                                                                                                                                                                                                                                                                                                                                                                                                                                                                                                                                                                                                                                                                                 |
| 35 | <b>pog frog</b>   Allegra Kefford, 15, United Kingdom                                                                                                                                                                                                                                                                                                                                                                                                                                                                                                                                                                                                                                                                                                                                                                                                                                                                                                                                                                                          |
|    | I think that pog/poggers is the exact exclamation everyone should feel when they see the frog and also it rhymes with frog so it is perfect.                                                                                                                                                                                                                                                                                                                                                                                                                                                                                                                                                                                                                                                                                                                                                                                                                                                                                                   |
| 36 | <b>Camouflage Goat Tree Frog</b> <i>Goat tree</i>   Allie Wyant, 12, USA                                                                                                                                                                                                                                                                                                                                                                                                                                                                                                                                                                                                                                                                                                                                                                                                                                                                                                                                                                       |
|    | I chose it because it was the eyes of goats and can hide with freckles.                                                                                                                                                                                                                                                                                                                                                                                                                                                                                                                                                                                                                                                                                                                                                                                                                                                                                                                                                                        |
| 37 | <b>Glass Half Full Frog</b> <i>Hyloscirtus Posterus</i>   Allison Marten, 18, USA                                                                                                                                                                                                                                                                                                                                                                                                                                                                                                                                                                                                                                                                                                    |
|    | This frog's beauty and its glassy skin inspired me to name it the Glass Half Full frog ( <i>Hyloscirtus Posterus</i> ) because right now the beauty of nature is a source of optimism and positivity for many people. Around the world, people are unable to be with other people in close quarters because of the pandemic. We have come to appreciate being outside and in nature, and it has been a way to stay in touch with people we wouldn't have been able to see indoors. The Glass Half Full frog, Latin+English name "Hyloscirtus Future" represents positivity, resilience, and appreciation of the world around us in confusing times. It also represents future-thinking in nature conservation because everything we do today will make a difference in the future. I think that going for a walk and seeing the Glass Half Full frog would make my day and make me more optimistic about the world around me.                                                                                                                  |
| 38 | <b>Halo frog</b> <i>Aureola</i>   Allison Luetje, Unspecified, USA                                                                                                                                                                                                                                                                                                                                                                                                                                                                                                                                                                                                                                                                                                                                                                                                                                                                                                                                                                             |
|    | I chose this name because halos are a part of nature and I wanted to give the frog a name that has to do something with nature.                                                                                                                                                                                                                                                                                                                                                                                                                                                                                                                                                                                                                                                                                                                                                                                                                                                                                                                |
| 39 | <b>Lil' Ecuatorial Rounded Fingertip Frog</b> <i>primum digitum dare Ecuatorial Rounded ranam</i>   Allyson Johnson, 16, USA                                                                                                                                                                                                                                                                                                                                                                                                                                                                                                                                                                                                                                                                                                                                                                                                                                                                                                                   |
|    | I choose this name because it represents this generation as rappers have been becoming popular in the youth, a physical characteristic of the frog, and where it was discovered. "Lil'" is a popular part of rapper names as many creators have implemented it into their name such as Lil Baby, Lil Yatchy, and Lil Huddy. This symbolizes the era of when the frog was discovered. I implemented "Ecuador" into the name because I think it is very important to know and identify somethings' or someones' origin. The last aspect of the name is "rounded fingertip" and I decided to add it to the name because it is a physical characteristic of the frog.                                                                                                                                                                                                                                                                                                                                                                              |
| 40 | <b>Cocoa frog</b> <i>Hyloscirtus Chocó</i>   Alyx Rhodes, 19, England                                                                                                                                                                                                                                                                                                                                                                                                                                                                                                                                                                                                                                                                                                                                                                                                                                                                                                                                                                          |
|    | The brown spots of this frog resemble cocoa powder and as they are it's key to survival it would make a good distinguishing feature to draw attention to. It is of the <i>hyloscirtus</i> genus as previously mentioned on this website and was found in the Chocó, it should be named after the cloud forest, I believe, as it is a rare ecosystem at high risk of damage and should be honoured in the name of this new species,                                                                                                                                                                                                                                                                                                                                                                                                                                                                                                                                                                                                             |
| 41 | <b>Algodon Masked Frog</b> <i>Hyloscirtus dissimulo</i>   Amaia González, 15, Dominican Republic                                                                                                                                                                                                                                                                                                                                                                                                                                                                                                                                                                                                                                                                                                                                                                                                                                                          |
|    | This name is perfect for this species since it reflects on its physical traits as well as its habitat. Algodon means cotton in Spanish, Ecuador's main language, which resembles clouds, specifically the clouds in the Chocó and Tropical Andes bioregion which the frog inhabits. Additionally, the word "Masked" resembles the frog's ability to camouflage and change color. This is also related to the frog's eyes since the pupils are shaped as if the eyes are covered by some sort of mask.                                                                                                                                                                                                                                                                                                                                                                                                                                                                                                                                          |

 = Winner  
 = Runner-Up  
 = Contributor  
 = Finalist  
 = Semi-Finalist  
 = Special Recognition  
 = Science & Research Award  
 = Creativity Award  
 = Inspiring Conservation Award  
 = Junior Scientist Award (12 & under)

## Species Naming Competition Full List of Entries

|    |                                                                                                                                                                                                                                                                                                                                                                                                                                                                                                                                                                                                                                                                                                                        |
|----|------------------------------------------------------------------------------------------------------------------------------------------------------------------------------------------------------------------------------------------------------------------------------------------------------------------------------------------------------------------------------------------------------------------------------------------------------------------------------------------------------------------------------------------------------------------------------------------------------------------------------------------------------------------------------------------------------------------------|
| 42 | <b>Rana Nublada</b> <i>Hyloscirtus Biosfera</i>   Ana Camila Lara López, 14, Ecuador ●                                                                                                                                                                                                                                                                                                                                                                                                                                                                                                                                                                                                                                 |
|    | Le quise poner rana nublada por el lugar en el que se encuentra, ya que vive en el bosque nublado en la región del chocó, además este lugar es candidato a ser una reserva de biósfera, lo cual la convertirá en una reserva de interés mundial gracias a su interés científico y variedad de especies, por lo cual se resaltaría a la rana y lo haría más conocido, también, este nombre identificaría y resaltaría a los bosques nublados de Ecuador los cuales se identifican por albergar este tipo de especies que tienen una importancia ecológica singular.                                                                                                                                                     |
| 43 | <b>Evangeline</b> <i>Hyloscirtus Evangeline</i>   Ana Paula Camacho Bucheli, 13, Ecuador                                                                                                                                                                                                                                                                                                                                                                                                                                                                                                                                                                                                                               |
|    | Yo le puse ese nombre a la ranita ya que de chiquita me encantaba mucho la película de la princesa y el sapo y en esa película salía Ray una luciérnaga muy gentil y carismática la cual estaba profundamente enamorado de una estrella la cual en las palabras de Ray era “la luciérnaga más hermosa de toda la creación”, y le decía “Ma Belle Evangeline” en francés, al final de todo cuando Ray murió se unió a Evangeline, siendo otra estrella. Me encantó la idea de ponerle Evangeline ya que representa un amor profundo y sincero, el cual Ray sentía por Evangeline. Aparte creo que le quedaría bien el nombre a la ranita ya que tiene una piel brillante igual a una estrella y me parece muy adorable. |
| 44 | <b>Rana ojo de tigre</b>   Analia Galarza, 18, Ecuador                                                                                                                                                                                                                                                                                                                                                                                                                                                                                                                                                                                                                                                                 |
|    | Porque los ojos de la rana se parecen a esas piedras que se llaman ojo de tigre y son medias anaranjadas                                                                                                                                                                                                                                                                                                                                                                                                                                                                                                                                                                                                               |
| 45 | <b>Rana Domelipa</b> <i>Hyloscirtus Domelipeous</i>   Andrea Proaño, 14, Ecuador                                                                                                                                                                                                                                                                                                                                                                                                                                                                                                                                                                                                                                       |
|    | Yo elegí este nombre ya que la persona que admiro se llama Dominik pero es más conocida como Domelipa ella es una youtuber, tiktoker e influencer mexicana. De ella lo que más admiro es su manera de bailar baila muy lindo y aparte me gusta mucho su personalidad. Porque es muy buena persona y siempre ayuda a las demás personas cuando lo necesitan. Por esa razón ella es mi idola, y la quiero mucho.                                                                                                                                                                                                                                                                                                         |
| 46 | <b>Frogeendor</b> <i>Cholesten green</i>   Angeline Ortiz, 13, Ecuador                                                                                                                                                                                                                                                                                                                                                                                                                                                                                                                                                                                                                                                 |
|    | Escogí este nombre ya que me llamo mucha la atención la apariencia de la rana y además el lugar en donde se encontró esta nueva especie y sobre todo su intenso color verde con sus ojos cafés.                                                                                                                                                                                                                                                                                                                                                                                                                                                                                                                        |
| 47 | <b>Banana Glassfrog/ Roundtipped banana glassfrog</b>   Angelique Honderd, 18, Netherlands ●                                                                                                                                                                                                                                                                                                                                                                                                                                                                                                                                                                                                                           |
|    | It really reminds me of a banana. In one of the pictures it looks like a more fresh banana with the green and when a banana gets more ripe it gets more yellow with brown spots just like this frog!                                                                                                                                                                                                                                                                                                                                                                                                                                                                                                                   |
| 48 | <b>comilion frog</b> <i>Anura carchi camilia</i>   Aniston McDowell, 10, USA ●                                                                                                                                                                                                                                                                                                                                                                                                                                                                                                                                                                                                                                         |
|    | I chose Anura Carchi Camilia because Anura is the scientific name for frog, Carchi is where it lives, and camilia because it can change color in its environment                                                                                                                                                                                                                                                                                                                                                                                                                                                                                                                                                       |
| 49 | <b>Adam's Ale Frog</b>   Anna Taylor, 20, British                                                                                                                                                                                                                                                                                                                                                                                                                                                                                                                                                                                                                                                                      |
|    | In English Adam's Ale is slang for water, and it's something all people need to survive. In this case I chose this name as the frog has a particular ability to stick to water surfaces. It is a light-hearted saying and I think that suits the frog nicely because it is petite and colourful so it should be given a name that's upbeat!                                                                                                                                                                                                                                                                                                                                                                            |
| 50 | <b>Mace's keen-eyed torrent frog</b> <i>macensis</i>   Anna Thonis, 25, USA ● ●                                                                                                                                                                                                                                                                                                                                                                                                                                                                                                                                                                                                                                        |
|    | Georgina Mace, a revolutionary conservation biologist and an instrumental scientist in the development of the quantitative criteria for the IUCN Red List, passed away on September 19, 2020. I think naming this species after Dr. Mace would be a wonderful way to honor her passion for and dedication to the conservation of species. I chose “keen-eyed” because when I look at many tree/torrent frogs, I always think they look like they are curiously scanning the area and their surroundings. I guess you could say that the word “keen” here really represents my personification of the frog, but I think this frog species looks inquisitive, and truthfully I would love to believe that it is!         |
| 51 | <b>The Raw-boned el chical frog</b> <i>Hylocirtus rudis cumino</i>   Annalise Ikenye, 14, Kenya ●                                                                                                                                                                                                                                                                                                                                                                                                                                                                                                                                                                                                                      |
|    | I choose this name because of the structure of the frog's body. Unlike a for example a bull frog, this frog is skinny and tiny. So I decided that raw-boned which also means skinny would be a perfect name for it.                                                                                                                                                                                                                                                                                                                                                                                                                                                                                                    |
| 52 | <b>Tawny freckled frog</b>   Annalise Manuella, 14, Kenyan                                                                                                                                                                                                                                                                                                                                                                                                                                                                                                                                                                                                                                                             |
|    | I choose this name since the frog looked freckled and the spots seemed to be a tawny brown color. Since the spots seemed to change color in each picture shown. I choose tawny brown since the color isn't too light or too dark making it the perfect shade for the frog.                                                                                                                                                                                                                                                                                                                                                                                                                                             |

 = Winner  
 = Runner-Up  
 = Contributor  
 = Finalist  
 = Semi-Finalist  
 = Special Recognition  
 = Science & Research Award  
 = Creativity Award  
 = Inspiring Conservation Award  
 = Junior Scientist Award (12 & under)



## Species Naming Competition Full List of Entries

|    |                                                                                                                                                                                                                                                                                                                                                                                                                                                                                                                                                                                                                                                                                                                                                                                                                                                                                                                                                                                                          |
|----|----------------------------------------------------------------------------------------------------------------------------------------------------------------------------------------------------------------------------------------------------------------------------------------------------------------------------------------------------------------------------------------------------------------------------------------------------------------------------------------------------------------------------------------------------------------------------------------------------------------------------------------------------------------------------------------------------------------------------------------------------------------------------------------------------------------------------------------------------------------------------------------------------------------------------------------------------------------------------------------------------------|
| 53 | <b>The speckled hope frog</b> <i>melius est sperare in futurum mundi</i>   Annia Malaugh, 15, Washington, England 🟡 🟠                                                                                                                                                                                                                                                                                                                                                                                                                                                                                                                                                                                                                                                                                                                                                                                                                                                                                    |
|    | I chose this because as much as a tiny frog can seem insignificant it can be seen to represent hope for the future of our planet, maybe if we help care for the planet we live in we may discover other new species of other animals or plants or maybe prevent them from extinction.                                                                                                                                                                                                                                                                                                                                                                                                                                                                                                                                                                                                                                                                                                                    |
| 54 | <b>Whistling Torrent Frog</b> <i>Hyloscirtus Carmen Avis</i>   Annika Jensen, 14, Canada 🟢 🟣                                                                                                                                                                                                                                                                                                                                                                                                                                                                                                                                                                                                                                                                                                                                                                                                                                                                                                             |
|    | The noises that it made in the audio recording sounded a lot like the song birds that I hear outside at home, hence the species name meaning songbird.                                                                                                                                                                                                                                                                                                                                                                                                                                                                                                                                                                                                                                                                                                                                                                                                                                                   |
| 55 | <b>Protect My Tree Frog</b> <i>Hylocirtus protecti</i>   Aoibhe Rose Lay, 3, British 🟠                                                                                                                                                                                                                                                                                                                                                                                                                                                                                                                                                                                                                                                                                                                                                                                                                                                                                                                   |
|    | Because without the trees the frogs cannot also survive! We need to protect every tree from this day on. I hope this message can be shown with the naming of this frog. Us children and youths want to fight to protect every tree, which will therefore protect every forest!                                                                                                                                                                                                                                                                                                                                                                                                                                                                                                                                                                                                                                                                                                                           |
| 56 | <b>Varuna's Torrent Frog</b> <i>Hyloscirtus Varuna</i>   Aran Setia Deverakonda, 8, India 🟢 🟡 🟠                                                                                                                                                                                                                                                                                                                                                                                                                                                                                                                                                                                                                                                                                                                                                                                                                                                                                                          |
|    | In Hindu mythology, Varuna is the lord of the hydrosphere and this frog lives near streams. In Indian mythology, Varuna is said to have taken the form of a frog. In certain communities in India it is considered a lucky charm and marriage between 2 frogs is believed to bring rain which is important for the traditional agrarian communities. One of the holy scriptures is also named after frogs called Madukya in Sanskrit, which teaches us how to leap like a frog into awareness. Maybe this frog can be a symbol of bringing awareness to the world regarding the need for conservation and that we need to leap into action and awareness no matter how slippery and difficult the path.                                                                                                                                                                                                                                                                                                  |
| 57 | <b>Gooley Chirping Frog</b> <i>Hylocirtus strideo</i>   Ari Johns, 16, USA                                                                                                                                                                                                                                                                                                                                                                                                                                                                                                                                                                                                                                                                                                                                                                                                                                                                                                                               |
|    | The frog looks gooeey or slimy, and I think the word gooeey is cute and accurate. It looks more slimy than the others shown for comparison. I also think its call sounds like a bird chirping. Strideo means chirp in Latin, so the two names are related.                                                                                                                                                                                                                                                                                                                                                                                                                                                                                                                                                                                                                                                                                                                                               |
| 58 | <b>The Stonewall Frog</b>   Ari Trueswell, 23, USA                                                                                                                                                                                                                                                                                                                                                                                                                                                                                                                                                                                                                                                                                                                                                                                                                                                                                                                                                       |
|    | The stonewall riots were an important turning point for LGBT+ rights in the USA and the world. The Stonewall riots, led by trans women of color, instigated important recognition and protection for LGBT+ people. Frogs are also really popular in the LGBT+ community, possibly because of a certain conservative TV host complaining (with no evidence) that chemicals in the water were turning the frogs gay.                                                                                                                                                                                                                                                                                                                                                                                                                                                                                                                                                                                       |
| 59 | <b>Color Changing Camo Frog</b>   Aria Lewis, 10, USA 🟡                                                                                                                                                                                                                                                                                                                                                                                                                                                                                                                                                                                                                                                                                                                                                                                                                                                                                                                                                  |
|    | I came up with "The Color Changing Camo Frog" because first that's what it has to do to survive as an animal it color changes to blend in with it's environment so it "Camouflages".                                                                                                                                                                                                                                                                                                                                                                                                                                                                                                                                                                                                                                                                                                                                                                                                                     |
| 60 | <b>rana caveatis porcina hylī camouflage</b>   Ariana Moreno, 13, Ecuador / Quito                                                                                                                                                                                                                                                                                                                                                                                                                                                                                                                                                                                                                                                                                                                                                                                                                                                                                                                        |
|    | elegí estos nombres ya que los dos hacen referencia a la gran característica de la rana la cual es camuflarse el nombre común esta en latín ya que esos nombres tienen que estar en latín                                                                                                                                                                                                                                                                                                                                                                                                                                                                                                                                                                                                                                                                                                                                                                                                                |
| 61 | <b>Rana kiwi</b> <i>Custos Saltu</i>   Ariana Julliete Narvaez Guerrero, 14, Ecuador                                                                                                                                                                                                                                                                                                                                                                                                                                                                                                                                                                                                                                                                                                                                                                                                                                                                                                                     |
|    | Elegí el nombre de rana Kiwi porque tanto como en la hembra y el macho se pueden diferenciar unas pequeñas manchas parecidas a las de la fruta del kiwi, me pareció muy curioso este nombre por el sentido que tiene y por su pequeño similar con este espécimen .El nombre en latín quiere decir 'guardián de la selva' elegí porque esta pequeña ranita es diminuta y puede vigilar el hábitat en donde este nombre fue el primero que se me ocurrió también porque esta ranita es muy difícil de encontrar y por eso se gano este nombre, porque se demoraron un estimado tiempo en encontrarla, ya que ella nos veía pero nosotros no .Lo nombre que le elegí bien no tienen mucho que ver pero los elegí desacuerdo a su condición y físico , se me hace muy gracioso pensar que hay muchos vigilantes de la selva y nos observan todo el tiempo, cada segundo, cada minuto, pero nosotros no los vemos pero si nos fijamos bien los descubriremos como a esta pequeña vigilante del la naturaleza. |
| 62 | <b>Pedrito</b> <i>Scelerisque Ranae</i>   Ariel Alarcón, 21, Ecuador                                                                                                                                                                                                                                                                                                                                                                                                                                                                                                                                                                                                                                                                                                                                                                                                                                                                                                                                     |
|    | He looks like a Pedrito.                                                                                                                                                                                                                                                                                                                                                                                                                                                                                                                                                                                                                                                                                                                                                                                                                                                                                                                                                                                 |
| 63 | <b>Hunter</b>   Arpa (Bancroft ES) Jannatul Nuri, 10, USA 🟡                                                                                                                                                                                                                                                                                                                                                                                                                                                                                                                                                                                                                                                                                                                                                                                                                                                                                                                                              |
|    | Elegí este nombre porque la rana se mueve mucho y caza para conseguir su comida.                                                                                                                                                                                                                                                                                                                                                                                                                                                                                                                                                                                                                                                                                                                                                                                                                                                                                                                         |

 = Winner  
 = Runner-Up  
 = Contributor  
 = Finalist  
 = Semi-Finalist  
 = Special Recognition  
 = Science & Research Award  
 = Creativity Award  
 = Inspiring Conservation Award  
 = Junior Scientist Award (12 & under)

## Species Naming Competition Full List of Entries

|    |                                                                                                                                                                                                                                                                                                                                                                                                                                                                                                                                                                                                                                                                                                                                                                                                                                                                                                                                                                                                                                                     |
|----|-----------------------------------------------------------------------------------------------------------------------------------------------------------------------------------------------------------------------------------------------------------------------------------------------------------------------------------------------------------------------------------------------------------------------------------------------------------------------------------------------------------------------------------------------------------------------------------------------------------------------------------------------------------------------------------------------------------------------------------------------------------------------------------------------------------------------------------------------------------------------------------------------------------------------------------------------------------------------------------------------------------------------------------------------------|
| 64 | <b>Rusted Torrent Frog</b> <i>Rusted (in latin)</i>   Arwen Martin, 13, Canada ●                                                                                                                                                                                                                                                                                                                                                                                                                                                                                                                                                                                                                                                                                                                                                                                                                                                                                                                                                                    |
|    | I named this frog due to the almost rust looking coloring on their skin and the fact that they are torrent frogs; they live by running water.                                                                                                                                                                                                                                                                                                                                                                                                                                                                                                                                                                                                                                                                                                                                                                                                                                                                                                       |
| 65 | <b>Bellus Ebenezer</b> <i>Bellus Ebenezer Scroogus</i>   Aryonne Fears, 14, USA                                                                                                                                                                                                                                                                                                                                                                                                                                                                                                                                                                                                                                                                                                                                                                                                                                                                                                                                                                     |
|    | This frog is very cute, but it squints its eyes as if it is an elderly person so the name Bellus Ebenezer Scroogus translates to “Cute Ebenezer Scrooge”.                                                                                                                                                                                                                                                                                                                                                                                                                                                                                                                                                                                                                                                                                                                                                                                                                                                                                           |
| 66 | <b>The Cloud Forest Glass Frog</b> <i>Hylocirtus corrientum</i>   Ashley Ortiz-Barrera, 14, USA ●                                                                                                                                                                                                                                                                                                                                                                                                                                                                                                                                                                                                                                                                                                                                                                                                                                                                                                                                                   |
|    | I chose the common name because the glass frog’s habitat is the cloud forest. The species name I chose is “corrientum” and I chose it because it includes the word “corriente”, which means “stream”, and that is where glass frogs lay their eggs.                                                                                                                                                                                                                                                                                                                                                                                                                                                                                                                                                                                                                                                                                                                                                                                                 |
| 67 | <b>Arrow Headed Torrent Frog</b>   Ashley Warwick, 16, Canada ●                                                                                                                                                                                                                                                                                                                                                                                                                                                                                                                                                                                                                                                                                                                                                                                                                                                                                                                                                                                     |
|    | I chose this name because both the female and male seem to have a head shaped like the head of an arrow, and I added Torrent because it shows what type of frog it is and it flows with the rest of the name.                                                                                                                                                                                                                                                                                                                                                                                                                                                                                                                                                                                                                                                                                                                                                                                                                                       |
| 68 | <b>Ocasio-Cortez’s torrent frog</b> <i>ocasiocortezii</i>   Ashwin Srinivasan, 18, USA ●●●                                                                                                                                                                                                                                                                                                                                                                                                                                                                                                                                                                                                                                                                                                                                                                                                                                                                                                                                                          |
|    | The US is one of the world’s biggest carbon emitters, something which threatens all species on Earth, including this frog. Of our politicians, none is more outspoken on climate change than Alexandria Ocasio-Cortez, who is widely credited for popularizing famous policies like the Green New Deal to radically stop our contribution to climate change. In addition, she is considered a shining example of the young people in American politics, which coincides with the reserve’s youth-focused message. Most importantly, she is also one of the most famous politicians in the US and has a huge amount of followers, which will bring lots of media attention to the frog and benefit the conservation of it and its relatives. While I’m usually not a fan of honorific names (I would have otherwise named it after Awa indigenous communities had it not been for the existence of the other frog), naming the species after a famous person who has done immense work to save the Earth will definitely benefit it and its habitat. |
| 69 | <b>long spotted frog</b> <i>Hyloscirtus broun spots</i>   Aubrey Baker, 10, Canada ●                                                                                                                                                                                                                                                                                                                                                                                                                                                                                                                                                                                                                                                                                                                                                                                                                                                                                                                                                                |
|    | Because it has a long body and also it has brown spots.                                                                                                                                                                                                                                                                                                                                                                                                                                                                                                                                                                                                                                                                                                                                                                                                                                                                                                                                                                                             |
| 70 | <b>Cinnamon Frog</b> <i>Hylocirtus cinnaminus</i>   Audrey Brintlinger, 6, USA ●                                                                                                                                                                                                                                                                                                                                                                                                                                                                                                                                                                                                                                                                                                                                                                                                                                                                                                                                                                    |
|    | I chose this name because the frog’s pattern is spotty, and its tiny brown spots look like cinnamon.                                                                                                                                                                                                                                                                                                                                                                                                                                                                                                                                                                                                                                                                                                                                                                                                                                                                                                                                                |
| 71 | <b>copper the colorful.</b> <i>aeris</i>   Audrey Schweiss, 10, U.S.A. ●                                                                                                                                                                                                                                                                                                                                                                                                                                                                                                                                                                                                                                                                                                                                                                                                                                                                                                                                                                            |
|    | I choose this name because the frog changes colors, and the name cooper is just really catchy.                                                                                                                                                                                                                                                                                                                                                                                                                                                                                                                                                                                                                                                                                                                                                                                                                                                                                                                                                      |
| 72 | <b>the boris</b> <i>amphibia</i>   Aurora gleeson, 11, canada ●                                                                                                                                                                                                                                                                                                                                                                                                                                                                                                                                                                                                                                                                                                                                                                                                                                                                                                                                                                                     |
|    | i chose this name because it sounds like an awesome name for a frog and it sounds really cool and i have never heard of a frog with this name before so i think it would be a cool name.                                                                                                                                                                                                                                                                                                                                                                                                                                                                                                                                                                                                                                                                                                                                                                                                                                                            |
| 73 | <b>Huapialcerro</b> <i>Bufonidae-sap</i>   Aurora Hinojosa, Unspecified, Quito-Ecuador                                                                                                                                                                                                                                                                                                                                                                                                                                                                                                                                                                                                                                                                                                                                                                                                                                                                                                                                                              |
|    | Bufonidae-sa Bufonidae:Nombre cientifico de un sapo Sap: -Sapo-                                                                                                                                                                                                                                                                                                                                                                                                                                                                                                                                                                                                                                                                                                                                                                                                                                                                                                                                                                                     |
| 74 | <b>Brown freckled goat Frog</b> <i>Goat frog</i>   Aurore Hock, 12, U.S.A                                                                                                                                                                                                                                                                                                                                                                                                                                                                                                                                                                                                                                                                                                                                                                                                                                                                                                                                                                           |
|    | I chose it because it has brown eyes and freckles and goat eyes.                                                                                                                                                                                                                                                                                                                                                                                                                                                                                                                                                                                                                                                                                                                                                                                                                                                                                                                                                                                    |
| 75 | <b>toad bufo bufo rana bufo</b>   Autumn Woolacott, 12, canada ●                                                                                                                                                                                                                                                                                                                                                                                                                                                                                                                                                                                                                                                                                                                                                                                                                                                                                                                                                                                    |
|    | i chose this name because it sounds realy cool                                                                                                                                                                                                                                                                                                                                                                                                                                                                                                                                                                                                                                                                                                                                                                                                                                                                                                                                                                                                      |
| 76 | <b>Cami</b> <i>Chamaeleonidae</i>   Ava Cartee, Unspecified, U.S.A                                                                                                                                                                                                                                                                                                                                                                                                                                                                                                                                                                                                                                                                                                                                                                                                                                                                                                                                                                                  |
|    | the frog can change color just like a chameleon.                                                                                                                                                                                                                                                                                                                                                                                                                                                                                                                                                                                                                                                                                                                                                                                                                                                                                                                                                                                                    |
| 77 | <b>Cerro jumper</b> <i>Cerro ranae</i>   Avery Leblanc, 11, Canada ●                                                                                                                                                                                                                                                                                                                                                                                                                                                                                                                                                                                                                                                                                                                                                                                                                                                                                                                                                                                |
|    | I chose this name because I think it’s important to have details about the frog in the name such as, Cerro. Cerro means Hill and that’s where the frog lives. And Cerro is short and easy to say and if you want to be even more specific, you can call it by the scientific name, Cerro ranae                                                                                                                                                                                                                                                                                                                                                                                                                                                                                                                                                                                                                                                                                                                                                      |
| 78 | <b>Mottled Maple Torrent Frog</b> <i>Cutiacernis</i>   Avery Cervantes Lalone, 16, USA ●                                                                                                                                                                                                                                                                                                                                                                                                                                                                                                                                                                                                                                                                                                                                                                                                                                                                                                                                                            |

 = Winner  
 = Runner-Up  
 = Contributor  
 = Finalist  
 = Semi-Finalist  
 = Special Recognition  
 = Science & Research Award  
 = Creativity Award  
 = Inspiring Conservation Award  
 = Junior Scientist Award (12 & under)

## Species Naming Competition Full List of Entries

|    |                                                                                                                                                                                                                                                                                                                                                                                                                                                                                                                                                                                                                                                                                                                                                                                                                                                                                                                                                                                                                                                                                                                                                                                                                                                                                                                                                                                                                                                                                                                                                                                                                           |
|----|---------------------------------------------------------------------------------------------------------------------------------------------------------------------------------------------------------------------------------------------------------------------------------------------------------------------------------------------------------------------------------------------------------------------------------------------------------------------------------------------------------------------------------------------------------------------------------------------------------------------------------------------------------------------------------------------------------------------------------------------------------------------------------------------------------------------------------------------------------------------------------------------------------------------------------------------------------------------------------------------------------------------------------------------------------------------------------------------------------------------------------------------------------------------------------------------------------------------------------------------------------------------------------------------------------------------------------------------------------------------------------------------------------------------------------------------------------------------------------------------------------------------------------------------------------------------------------------------------------------------------|
|    | I chose this name because the members of the species seem to have a similar skin patterning to that of a maple leaf. Maple leaves can have brown mottling from fungi as well as yellow speckling. I was inspired to name this frog after the maple leaves by the Maple Trees that grow all around me.                                                                                                                                                                                                                                                                                                                                                                                                                                                                                                                                                                                                                                                                                                                                                                                                                                                                                                                                                                                                                                                                                                                                                                                                                                                                                                                     |
| 79 | <b>Libke</b> <i>Hyloscirtus Libke</i>   Avery Fleeman, 20, USA                                                                                                                                                                                                                                                                                                                                                                                                                                                                                                                                                                                                                                                                                                                                                                                                                                                                                                                                                                                                                                                                                                                                                                                                                                                                                                                                                                                                                                                                                                                                                            |
|    | One of friends sent this to everyone he knows. I've never seen someone get so excited about amphibians or reptiles. His name is Zane Libke                                                                                                                                                                                                                                                                                                                                                                                                                                                                                                                                                                                                                                                                                                                                                                                                                                                                                                                                                                                                                                                                                                                                                                                                                                                                                                                                                                                                                                                                                |
| 80 | <b>Roberts' freckled torrent frog</b> <i>Hylocirtus Awamurumfugere</i>   Avrey Baron, 21, USA ● ●                                                                                                                                                                                                                                                                                                                                                                                                                                                                                                                                                                                                                                                                                                                                                                                                                                                                                                                                                                                                                                                                                                                                                                                                                                                                                                                                                                                                                                                                                                                         |
|    | The common name is in reference to the Dread Pirate Roberts from the Princess Bride. In the movie, Wesley, disguised as the Dread Pirate Roberts, scales the cliff side and reminds me of the frogs sticky properties. The freckled comes from its freckled appearance. The second part of the scientific name, murum fugere, means a fly on the wall. This is a reference to its camouflage and its sticky properties. The first part, awa, is a nod to the indigenous tribe of the area because indigenous peoples can often be ignored in conservation efforts and its important to recognize them. Bit of a mouthful, though 🤪                                                                                                                                                                                                                                                                                                                                                                                                                                                                                                                                                                                                                                                                                                                                                                                                                                                                                                                                                                                        |
| 81 | <b>multicolor gelatin</b> <i>Hyloscirtus mutatiogelatina</i>   Avril Quiroga, 16, Dominican Republic                                                                                                                                                                                                                                                                                                                                                                                                                                                                                                                                                                                                                                                                                                                                                                                                                                                                                                                                                                                                                                                                                                                                                                                                                                                                                                                                                                                                                                                                                                                      |
|    | I choose this name because of the frog's physical characteristics. This new species of frog changes color and its texture looks like squishy gelatin. It immediately reminded me about the green gelatin hospital give to their patient. In the scientific name, I decided to take away the color because this was more straightforward characters of the frog which is gelatin texture and the change of color the frogs have.                                                                                                                                                                                                                                                                                                                                                                                                                                                                                                                                                                                                                                                                                                                                                                                                                                                                                                                                                                                                                                                                                                                                                                                           |
| 82 | <b>Choremunger</b> <i>The Choco Choremunger</i>   Beatrice Bazley, 13, British ●                                                                                                                                                                                                                                                                                                                                                                                                                                                                                                                                                                                                                                                                                                                                                                                                                                                                                                                                                                                                                                                                                                                                                                                                                                                                                                                                                                                                                                                                                                                                          |
|    | Chore- a long or unpleasant task Munger- a word we made up and like the sound of Hidden in a remote forest in Ecuador, this frog would be quite a chore to find! Some might even describe the journey as a bit of a choremunger in years to come. The choco choremunger will inspire the next generation like my sister Beatrice to explore nature (chormunger) in their back gardens and local wildlife parks! To see what they can discover.                                                                                                                                                                                                                                                                                                                                                                                                                                                                                                                                                                                                                                                                                                                                                                                                                                                                                                                                                                                                                                                                                                                                                                            |
| 83 | <b>The mood frog</b> <i>moodies</i>   Beatriz Balderas, 14, USA                                                                                                                                                                                                                                                                                                                                                                                                                                                                                                                                                                                                                                                                                                                                                                                                                                                                                                                                                                                                                                                                                                                                                                                                                                                                                                                                                                                                                                                                                                                                                           |
|    | Because the frog changes color and something that reminds me of changing color is the mood changing jewelry.                                                                                                                                                                                                                                                                                                                                                                                                                                                                                                                                                                                                                                                                                                                                                                                                                                                                                                                                                                                                                                                                                                                                                                                                                                                                                                                                                                                                                                                                                                              |
| 84 | <b>Carchi Epizón Glassfrog</b> <i>Quodcumque Speculo</i>   Beatriz Vicario, 17, Dominican Republic ●                                                                                                                                                                                                                                                                                                                                                                                                                                                                                                                                                                                                                                                                                                                                                                                                                                                                                                                                                                                                                                                                                                                                                                                                                                                                                                                                                                                                                                                                                                                      |
|    | When choosing a common name for a recently discovered species, it is important to take into consideration the physical characteristics, location, habitat, or the people who live in the area before naming it. After reading all the information that has been allocated to this frog, I came up with the name "Carchi Epizón Glassfrog" to quickly identify the region it belongs to, what type of frog it is, and I included a hidden message for future generations. This newly discovered amphibian lives inside a small known home range about the size of just one square kilometer within the Carchi province in Ecuador. For this reason, I made sure to include the region this frog comes from, to easily identify its origin and location. Adding on, common names will often give clues of the species' taxonomy to describe and classify organisms effectively. In the creation of my common name, I made sure to include that this frog has been proven to belong to the glass frog family which makes this the proper identifier to include within its name. Lastly, the word Epizón means remaining alive, especially after conditions impacting one's surroundings. I included this word as a hidden message to future generations. The year 2020 has been very tough on everyone, with everything happening as seen in the daily news. If this rare frog was able to remain sustainable, everything included, we should value animal life a lot more than before as well as take proper care for them. We only have one Earth and it does not take much looking to find a rare beauty in every corner. |
| 85 | <b>Sage mode tree frog</b> <i>Sageius modeis</i>   Beckett MacDonald, 12, Canada ●                                                                                                                                                                                                                                                                                                                                                                                                                                                                                                                                                                                                                                                                                                                                                                                                                                                                                                                                                                                                                                                                                                                                                                                                                                                                                                                                                                                                                                                                                                                                        |
|    | Because I I'm a huge Naruto fan!                                                                                                                                                                                                                                                                                                                                                                                                                                                                                                                                                                                                                                                                                                                                                                                                                                                                                                                                                                                                                                                                                                                                                                                                                                                                                                                                                                                                                                                                                                                                                                                          |
| 86 | <b>The Tulcan Hopping Frog</b>   Belmin Muslic, 10, USA ●                                                                                                                                                                                                                                                                                                                                                                                                                                                                                                                                                                                                                                                                                                                                                                                                                                                                                                                                                                                                                                                                                                                                                                                                                                                                                                                                                                                                                                                                                                                                                                 |
|    | The reason why I chose this name is because it lives in Tulcan and it also jumps a lot.                                                                                                                                                                                                                                                                                                                                                                                                                                                                                                                                                                                                                                                                                                                                                                                                                                                                                                                                                                                                                                                                                                                                                                                                                                                                                                                                                                                                                                                                                                                                   |
| 87 | <b>Changeable Tulcán Torrenteer</b> <i>Hylocirtus variabilis</i>   Benjamin Cvengros, 24, USA ●                                                                                                                                                                                                                                                                                                                                                                                                                                                                                                                                                                                                                                                                                                                                                                                                                                                                                                                                                                                                                                                                                                                                                                                                                                                                                                                                                                                                                                                                                                                           |
|    | I wanted to highlight the wide variation in the visual presentation of this species. The name could even be Variable instead of Changeable. I decided on "changeable" because this species like others in its genus changes color depending on its environment. Variable would also work since the eyes are not always chestnut brown and can be white. I chose to also include the name of the County Tulcan in order to add more detail to the name as well as tie this frog to the location and, most importantly, the community of people that live in this county. I am hoping that with a location-based name, the people of the region would take more pride in this rare species and help to preserve its habitat because it "belongs" to them (in a sense).                                                                                                                                                                                                                                                                                                                                                                                                                                                                                                                                                                                                                                                                                                                                                                                                                                                      |

 = Winner  
 = Runner-Up  
 = Contributor  
 = Finalist  
 = Semi-Finalist  
 = Special Recognition  
 = Science & Research Award  
 = Creativity Award  
 = Inspiring Conservation Award  
 = Junior Scientist Award (12 & under)



## Species Naming Competition Full List of Entries

|     |                                                                                                                                                                                                                                                                                                                                                                                                                                                                                                                                                                                                                               |
|-----|-------------------------------------------------------------------------------------------------------------------------------------------------------------------------------------------------------------------------------------------------------------------------------------------------------------------------------------------------------------------------------------------------------------------------------------------------------------------------------------------------------------------------------------------------------------------------------------------------------------------------------|
| 88  | <b>Brown-skinned Tree Frog of Ecuador</b>   Blake Hotham, 8, USA 🟡                                                                                                                                                                                                                                                                                                                                                                                                                                                                                                                                                            |
|     | I chose this name because the frog has brown skin and lives in Ecuador.                                                                                                                                                                                                                                                                                                                                                                                                                                                                                                                                                       |
| 89  | <b>Scowling Torrent Frog</b> <i>Malevolum</i>   Blake Jarosinski, 22, USA 🟢                                                                                                                                                                                                                                                                                                                                                                                                                                                                                                                                                   |
|     | The frog's eyes make it look as if it is scowling/grumpy                                                                                                                                                                                                                                                                                                                                                                                                                                                                                                                                                                      |
| 90  | <b>Steve Irwin's tree frog</b> <i>Steveis Irwinis</i>   Braden Owen, 13, USA 🟠                                                                                                                                                                                                                                                                                                                                                                                                                                                                                                                                                |
|     | I wanted it to be named after Steve Irwin and it is pronounced Steve-is Irwin-is. He was an amazing man and I think it would be amazing to name this wonderful creature after an amazing man and same with his family. I at least want the Irwinis part in there name. He has made me want to dedicate my life to research and conservation of the earth's animals although I can't do that for a while not old enough to leave the country and live in another one to work around the world or at Australia zoo.                                                                                                             |
| 91  | <b>Tulcán Valley Torrent Frog</b> <i>Hylocirtus cascadeae</i>   Braden Alexander, 19, USA 🟢 🟡                                                                                                                                                                                                                                                                                                                                                                                                                                                                                                                                 |
|     | Given this species is a denizen of the breathtaking montane valleys of the Ecuadorian rainforest, residing primarily near gorgeous cascading waters, I feel that both the common name and its binomial are rather fitting to describe both where this species is from, as well as its ecology.                                                                                                                                                                                                                                                                                                                                |
| 92  | <b>Choco el chical awa</b>   Bradley Primiano, 22, UK British 🟢                                                                                                                                                                                                                                                                                                                                                                                                                                                                                                                                                               |
|     | Becose of the peaple,habbitat,and places,towns                                                                                                                                                                                                                                                                                                                                                                                                                                                                                                                                                                                |
| 93  | <b>Speckled Chameleon Frog</b> <i>Sacrorum Frog colore respersa</i>   Bradyn Jenkins, 12, USA                                                                                                                                                                                                                                                                                                                                                                                                                                                                                                                                 |
|     | The Frog has a speckeld back, and is color changing, and lives in trees                                                                                                                                                                                                                                                                                                                                                                                                                                                                                                                                                       |
| 94  | <b>The blue toed frog</b> <i>Hyloscirtus azura</i>   Braeden Raymer, 16, U.S.A                                                                                                                                                                                                                                                                                                                                                                                                                                                                                                                                                |
|     | I chose this name because of the characteristics in the toes, which would be blue. The frog would have similar characteristics in any other situation other than the blue toes whihc makes the frog an outlier.                                                                                                                                                                                                                                                                                                                                                                                                               |
| 95  | <b>Barkeye Torrent Frog</b>   Brant McCracken, 22, USA 🟢                                                                                                                                                                                                                                                                                                                                                                                                                                                                                                                                                                      |
|     | It was the first thing I thought of honestly! Zane Libke (my buddy) sent me a picture of it and the frogs eyes look like the common tree bark you'd find on a tree in your backyard!                                                                                                                                                                                                                                                                                                                                                                                                                                          |
| 96  | <b>Chicalean Round Finger Glass frog</b> <i>Hyloscirtus Cirmcumdigitusspeculo</i>   Brenden Godfrey, 15, Dominican Republic 🟢                                                                                                                                                                                                                                                                                                                                                                                                                                                                                                 |
|     | I chose this name because of the distinct features the new species exhibits in its fingertips. It most notably demonstrates to have evolved to possess round fingertips, opposed to that of its fellow Glass Frogs. For these reasons I chose to highlight the location where it can be most commonly located, its most distinct characteristic, and link it back to other similar species.                                                                                                                                                                                                                                   |
| 97  | <b>lia Watrelia</b>   Brianna Peterson, 11, Canada 🟡                                                                                                                                                                                                                                                                                                                                                                                                                                                                                                                                                                          |
|     | I chose this name because the name Watrelia because the name Aurelia is from a Latin family name, which was derived from aureus meaning golden for when it's skin changes colour, I also used the word water because it is a species of frogs that live near streams and rivers. So I got the name Watrelia by combining the names water and Aurelia.                                                                                                                                                                                                                                                                         |
| 98  | <b>Sticky fog</b> <i>Silvagenitus</i>   Brienne Lunde, 26, Canada                                                                                                                                                                                                                                                                                                                                                                                                                                                                                                                                                             |
|     | This name was chosen both because of the "major update" in characteristics this frog has as compared to tree frogs, and it's habitat. These frogs are particularly "sticky" to their surroundings, like the fog that "sticks" to the landscape in the form of Silvagenitus clouds.                                                                                                                                                                                                                                                                                                                                            |
| 99  | <b>The Sticky Ecuadorian Tree frog</b> <i>Hylocirtus Brieus</i>   Brienna Fraser, 15, Canadian                                                                                                                                                                                                                                                                                                                                                                                                                                                                                                                                |
|     | The common name was chosen based off of facts about the frog, sticky because they can climb, Ecuadorian because they live in Ecuador and Tree frog because it's a tree frog. The scientific name however is a okay on my surname. I don't know Latin so I am unsure if it is a real word but it sounds cool.                                                                                                                                                                                                                                                                                                                  |
| 100 | <b>Ginsburg's frog</b> <i>Ginsburgi</i>   Brittany Leyda, 21, USA 🟠 🟡                                                                                                                                                                                                                                                                                                                                                                                                                                                                                                                                                         |
|     | Ruth Bader Ginsburg was an inspiring woman and Supreme Court Justice of the USA who died not too long before this naming contest closes. Not only was she a staunch defender of women's rights and equality in general in the USA, she even has a record of using her power to support environmental protections (one case, as an example, is Friends of the Earth v. Laidlaw Environmental Services, 2000). I would love for her name to become more well-known around the world so that she can continue to be an inspiration not just to women and girls in the USA, but for all girls, women, and nature-lovers on Earth. |

 = Winner  
 = Runner-Up  
 = Contributor  
 = Finalist  
 = Semi-Finalist  
 = Special Recognition  
 = Science & Research Award  
 = Creativity Award  
 = Inspiring Conservation Award  
 = Junior Scientist Award (12 & under)

## Species Naming Competition Full List of Entries

|     |                                                                                                                                                                                                                                                                                                                                                                                                                                                                                                                                                 |
|-----|-------------------------------------------------------------------------------------------------------------------------------------------------------------------------------------------------------------------------------------------------------------------------------------------------------------------------------------------------------------------------------------------------------------------------------------------------------------------------------------------------------------------------------------------------|
| 101 | <b>Ecuadorean Camo Frog</b>   Brittany Kawa, 26, USA                                                                                                                                                                                                                                                                                                                                                                                                                                                                                            |
|     | WE chose this name based on it's location and it's ability to camouflage itself from predators                                                                                                                                                                                                                                                                                                                                                                                                                                                  |
| 102 | <b>Round Fingertip River Frog</b>   Brittany Kawa, 26, USA                                                                                                                                                                                                                                                                                                                                                                                                                                                                                      |
|     | We selected this name based on it's adaptations and habitat                                                                                                                                                                                                                                                                                                                                                                                                                                                                                     |
| 103 | <b>bobber bobber</b>   brittney coleman, Unspecified, american                                                                                                                                                                                                                                                                                                                                                                                                                                                                                  |
|     | because i think it is a good name for a frog.                                                                                                                                                                                                                                                                                                                                                                                                                                                                                                   |
| 104 | <b>wigglyair frog</b> <i>Hylocirtus.falahshipie</i>   Bruelle Bruno, 14, USA                                                                                                                                                                                                                                                                                                                                                                                                                                                                    |
|     | it was just the first thing that came in my head.                                                                                                                                                                                                                                                                                                                                                                                                                                                                                               |
| 105 | <b>Cloud Wolf Torrenteer</b> <i>cirrocumulus</i>   Buffy Beck, 25, United Kingdom <span style="color: green;">●</span>                                                                                                                                                                                                                                                                                                                                                                                                                          |
|     | Cloud Wolf was a famous sky-pirate in one of my favourite book series, the Edge Chronicles. The reserve reminds me of the vast deepwoods from the books; where you would discover amazing creatures and plants along with the outright bizarre. The captain Cloud Wolf was at home in the sky; sailing his magnificent sky ship in the drifting clouds over the endless forest below him. The scientific name, cirrocumulus, refers to the location of the frog as well as the dotted pattern on its back, which resembles cirrocumulus clouds. |
| 106 | <b>Hylocirtus macrobandition</b>   Bukuru Josephine, 14, African                                                                                                                                                                                                                                                                                                                                                                                                                                                                                |
|     | The reason I chose a simple name like macrobandition is because there is this song on tik tok that has marco and I like the word bandit. Bandit is like a thief so it is like I stole the creatures common name and it may be mine to claim.                                                                                                                                                                                                                                                                                                    |
| 107 | <b>Lantern Carchi Rosa</b> <i>Hylocirtus Emeraldo</i>   Butoyi Aline, 14, USA                                                                                                                                                                                                                                                                                                                                                                                                                                                                   |
|     | The name I chose is significant to where the frog is from. The name Emeraldo is related to the beautiful green color the frog has, and the world Emerald is a fancy name for green. I chose the name Rosa because it makes the name sound good. Overall, I think the name Lantern Carchi Rosa and scientific name Hylocirtus Emeraldo fits the frog                                                                                                                                                                                             |
| 108 | <b>Brown-eyed bird frog</b> <i>Brown luscus avis ranae</i>   Caden Tobar, 10, USA <span style="color: orange;">●</span>                                                                                                                                                                                                                                                                                                                                                                                                                         |
|     | I choose this name because of its brown eyes and the sound it makes.                                                                                                                                                                                                                                                                                                                                                                                                                                                                            |
| 109 | <b>Amazonian Dragon frog</b>   Caedence Hill, 10, U.S.A. <span style="color: yellow;">●</span>                                                                                                                                                                                                                                                                                                                                                                                                                                                  |
|     | I chose this name because I love dragons and the frog was located in Ecuador, which is mostly covered by the Amazon rain forest.                                                                                                                                                                                                                                                                                                                                                                                                                |
| 110 | <b>Cailiosa</b>   Cailiosa Riley, 18, South Africa                                                                                                                                                                                                                                                                                                                                                                                                                                                                                              |
|     | Old Irish name " Gift from God"                                                                                                                                                                                                                                                                                                                                                                                                                                                                                                                 |
| 111 | <b>Speckle of Hope Frog</b> <i>Hylocirtus dumspirospero</i>   Caitlin McLeod, 22, New Zealand <span style="color: green;">●</span> <span style="color: orange;">●</span>                                                                                                                                                                                                                                                                                                                                                                        |
|     | Speckle refers to the physical colouring characteristic present on many individuals of the species. The hope is for its future, and the future of conservation around the world. If this species and this piece of conservation land it is on can make it, then let it be a symbol of hope. It's scientific name is based on dum spiro spero- "while I breathe, I hope."                                                                                                                                                                        |
| 112 | <b>The equador Yellow Back frog</b> <i>AmphibiousComplexus</i>   Caleb Davis, 13, USA                                                                                                                                                                                                                                                                                                                                                                                                                                                           |
|     | Because it looks like the frog has a yellow skinned back so i thought the ame owuld be cool                                                                                                                                                                                                                                                                                                                                                                                                                                                     |
| 113 | <b>rounded fingertiped camo glass frog</b> <i>primundigitum dare rotundatis cavetis porcina</i>   Caleigh Dymond, 11, Canada <span style="color: yellow;">●</span>                                                                                                                                                                                                                                                                                                                                                                              |
|     | I chose the name rounded fingertiped camo glass frog because the frog has rounded fingertips it can camouflage itself and its a glass frog.                                                                                                                                                                                                                                                                                                                                                                                                     |
| 114 | <b>Shokoamadia Rahna shoko</b>   Calyx Vroom, 6, USA <span style="color: yellow;">●</span>                                                                                                                                                                                                                                                                                                                                                                                                                                                      |
|     | Because I was being creative and I was just having fun with playing with names.                                                                                                                                                                                                                                                                                                                                                                                                                                                                 |
| 115 | <b>Circled Pandora Frog</b>   Camden Albright, 8, USA <span style="color: yellow;">●</span>                                                                                                                                                                                                                                                                                                                                                                                                                                                     |
|     | I chose this name because it's fingertips are circled and because Pandora was the first thing that came to my head.                                                                                                                                                                                                                                                                                                                                                                                                                             |
| 116 | <b>The jelly bean frog</b>   Camellia Whitehill, 26, USA                                                                                                                                                                                                                                                                                                                                                                                                                                                                                        |
|     | Because this little frog looks like a jelly bean                                                                                                                                                                                                                                                                                                                                                                                                                                                                                                |

● = Winner   
● = Runner-Up   
● = Contributor   
● = Finalist   
● = Semi-Finalist   
● = Special Recognition  
● = Science & Research Award   
● = Creativity Award   
● = Inspiring Conservation Award   
● = Junior Scientist Award (12 & under)

## Species Naming Competition Full List of Entries

|     |                                                                                                                                                                                                                                                                                                                                                                                                                                                                                                                                                                                                                                                                                                                                                                                                                                                                                                                                                                                                                                                                                                                                                                                                                                                                                                                                                                                                                                                                                                                                                                                                                                                                                                                                                                                                                                                                                                                                                      |
|-----|------------------------------------------------------------------------------------------------------------------------------------------------------------------------------------------------------------------------------------------------------------------------------------------------------------------------------------------------------------------------------------------------------------------------------------------------------------------------------------------------------------------------------------------------------------------------------------------------------------------------------------------------------------------------------------------------------------------------------------------------------------------------------------------------------------------------------------------------------------------------------------------------------------------------------------------------------------------------------------------------------------------------------------------------------------------------------------------------------------------------------------------------------------------------------------------------------------------------------------------------------------------------------------------------------------------------------------------------------------------------------------------------------------------------------------------------------------------------------------------------------------------------------------------------------------------------------------------------------------------------------------------------------------------------------------------------------------------------------------------------------------------------------------------------------------------------------------------------------------------------------------------------------------------------------------------------------|
| 117 | <b>Princeps caelum-urino</b>   Cameryn Polk, 14, USA                                                                                                                                                                                                                                                                                                                                                                                                                                                                                                                                                                                                                                                                                                                                                                                                                                                                                                                                                                                                                                                                                                                                                                                                                                                                                                                                                                                                                                                                                                                                                                                                                                                                                                                                                                                                                                                                                                 |
|     | Why did I choose this name? Well, the blueprint of cultivating this name idea was a laborious yet exciting task. Princeps translates to princess and this name comes from the notable movie, “Princess and the frogs” which is one of my favorite movies. Caelum-urino translates to sky-dive which came from the idea of the frog laying eggs in leaves and the tadpoles falling into the water in close proximity.                                                                                                                                                                                                                                                                                                                                                                                                                                                                                                                                                                                                                                                                                                                                                                                                                                                                                                                                                                                                                                                                                                                                                                                                                                                                                                                                                                                                                                                                                                                                 |
| 118 | <b>John-Cameo-Frog</b>   Camie Feindt, 23, German                                                                                                                                                                                                                                                                                                                                                                                                                                                                                                                                                                                                                                                                                                                                                                                                                                                                                                                                                                                                                                                                                                                                                                                                                                                                                                                                                                                                                                                                                                                                                                                                                                                                                                                                                                                                                                                                                                    |
|     | Because my best friends favourite animals are frogs and he will appreciate it if one species is named after him.                                                                                                                                                                                                                                                                                                                                                                                                                                                                                                                                                                                                                                                                                                                                                                                                                                                                                                                                                                                                                                                                                                                                                                                                                                                                                                                                                                                                                                                                                                                                                                                                                                                                                                                                                                                                                                     |
| 119 | <b>crystal clear round feet frog chiquiliana</b>   Camila Narváez, 14, Ecuador                                                                                                                                                                                                                                                                                                                                                                                                                                                                                                                                                                                                                                                                                                                                                                                                                                                                                                                                                                                                                                                                                                                                                                                                                                                                                                                                                                                                                                                                                                                                                                                                                                                                                                                                                                                                                                                                       |
|     | Yo escogí este nombre porque me hace referencia a la familia a la que pertenece esta rana que son las ranas de cristal o transparentes, por eso le puse crystal clear además de que me recuerda a una frase de una de mis canciones favoritas de uno de mis artistas favoritos que es Black and white de Niall Horan, luego puse el resto del nombre de acuerdo a la particular forma que poseen sus extremidades inferiores y lo que es algo que la hace única y ayuda a distinguirla de otras especies similares, también he intentado que sea un nombre común para que pueda ser utilizado fácilmente por cualquier persona, además he intentado ir mas allá de un simple nombre de tal manera que deseo encontrar un significado un poco personal para este nombre pero que a su vez involucre cada característica que esta especie tiene, por ejemplo estoy relacionando que esta especie puede cambiar el color de su piel y el color de sus ojos con la canción a la que hago referencia en su nombre y también con su autor.                                                                                                                                                                                                                                                                                                                                                                                                                                                                                                                                                                                                                                                                                                                                                                                                                                                                                                                 |
| 120 | <b>The Fluid Inquito Torrent Frog <i>Hyloscirtus chromat</i></b>   Carinne Barker, 21, USA ●●                                                                                                                                                                                                                                                                                                                                                                                                                                                                                                                                                                                                                                                                                                                                                                                                                                                                                                                                                                                                                                                                                                                                                                                                                                                                                                                                                                                                                                                                                                                                                                                                                                                                                                                                                                                                                                                        |
|     | I chose my name from the chromatophore cells which change color and reflect light in some amphibians. I thought these frogs might use them to re-orient pigments and reflect different colors. I chose my common name using the word ‘fluid’ based on changing nature of the frogs’ color, and the possibility that their future might change based on habitat destruction. I used the Spanish word ‘inquito’ to suggest that the frogs might be uneasy and worried if they knew the state of climate and habitat change that could easily affect them further in the coming years. I think it’s also important for Spanish to be represented in the name even when it is translated to English. Its exciting to discover new frogs, but especially in such a small area of habitat, these frogs will be even more susceptible to danger if any of their habitat is altered by humans.                                                                                                                                                                                                                                                                                                                                                                                                                                                                                                                                                                                                                                                                                                                                                                                                                                                                                                                                                                                                                                                               |
| 121 | <b>Ecuador back spotted frog</b>   Carlisle Hicks, 11, U.S.A ●                                                                                                                                                                                                                                                                                                                                                                                                                                                                                                                                                                                                                                                                                                                                                                                                                                                                                                                                                                                                                                                                                                                                                                                                                                                                                                                                                                                                                                                                                                                                                                                                                                                                                                                                                                                                                                                                                       |
|     | Because the frog has spots on it’s back and I think the spots stand out                                                                                                                                                                                                                                                                                                                                                                                                                                                                                                                                                                                                                                                                                                                                                                                                                                                                                                                                                                                                                                                                                                                                                                                                                                                                                                                                                                                                                                                                                                                                                                                                                                                                                                                                                                                                                                                                              |
| 122 | <b>Kermit la rana Rene <i>Sachatamia Hylocirtus</i></b>   Carolina Tamayo, 14, Ecuador                                                                                                                                                                                                                                                                                                                                                                                                                                                                                                                                                                                                                                                                                                                                                                                                                                                                                                                                                                                                                                                                                                                                                                                                                                                                                                                                                                                                                                                                                                                                                                                                                                                                                                                                                                                                                                                               |
|     | porque Kermit es una rana que ha estado en la infancia de todos a nivel mundial y cada que veamos a esta especie tririamos recuerdos a nuestra mente y sonreiremos ya que el amor y diversión que este personaje nos entrego es gigante y lo amamos igualmente                                                                                                                                                                                                                                                                                                                                                                                                                                                                                                                                                                                                                                                                                                                                                                                                                                                                                                                                                                                                                                                                                                                                                                                                                                                                                                                                                                                                                                                                                                                                                                                                                                                                                       |
| 123 | <b>Rana pecosa con yemas redondas <i>Hylocirtus conscientia</i></b>   Carolina Bustillos, 19, Ecuador ●●●                                                                                                                                                                                                                                                                                                                                                                                                                                                                                                                                                                                                                                                                                                                                                                                                                                                                                                                                                                                                                                                                                                                                                                                                                                                                                                                                                                                                                                                                                                                                                                                                                                                                                                                                                                                                                                            |
|     | Escogí el nombre común porque lo que para mí más resaltó de esta ranita son su pecas rojas y la forma de sus dedos. Me parece que es algo que resalta bastante de esta rana, y que la distingue del resto de sus vecinos. Por otro lado, escogí este nombre científico porque pienso que esta rana descubierta recientemente debe llevar un mensaje a las futuras generaciones... el mensaje de la conciencia y cuidado por el mundo. Pues, estamos en un punto tan crítico en la historia, donde la tierra y sus especies no puede seguir aguantando más explotación y descuido por parte de las personas. Todos somos parte de este mundo y todos debemos tener la CONCIENCIA de cuidarlo, de gastar menor cantidad de agua, de usar fuentes de energía renovables, de consumir menos carne, de cultivar productos agrícolas en granjas de interior. Lo que yo quiero hacer cuando sea profesional es realizar nuevas metodologías de agricultura o ganadería para reducir las emisiones expulsadas de las mismas actividades y usar menores recursos, o investigar sobre nuevos y eficientes métodos de biorremediación. Un día reflexioné mucho y pensé: “yo puedo lograr grandes cambios. Puedo lograr limpiar un río por completo. Puedo dejar de comer carne. Puedo lograr invertir menor cantidad de agua para la agricultura. Pero... no va a importar nada que yo haga todo esto si las personas siguen teniendo la misma mentalidad consumista. El cambio empieza cuando todos seamos conscientes con la tierra, cuando seamos agradecidos y aprendamos a cuidar de ella. Lo que también debo hacer es buscar la manera de hacer conscientizar a las personas del cuidado y aprecio que deben tener por el mundo”. Pienso que esta ranita debe llevar ese mensaje... el mensaje de estar conscientes de lo maravillosa que es esta tierra con toda su flora y fauna y de estar conscientes que deben cuidarla y ser agradecidos con ella. |
| 124 | <b>Segez <i>Southena Gomica</i></b>   Carolina Ferdinand, Unspecified, Dominican Republic ●                                                                                                                                                                                                                                                                                                                                                                                                                                                                                                                                                                                                                                                                                                                                                                                                                                                                                                                                                                                                                                                                                                                                                                                                                                                                                                                                                                                                                                                                                                                                                                                                                                                                                                                                                                                                                                                          |

 = Winner  
 = Runner-Up  
 = Contributor  
 = Finalist  
 = Semi-Finalist  
 = Special Recognition  
 = Science & Research Award  
 = Creativity Award  
 = Inspiring Conservation Award  
 = Junior Scientist Award (12 & under)

## Species Naming Competition Full List of Entries

|     |                                                                                                                                                                                                                                                                                                                                                                                                                                                                                                                                                                                                                                                                                                                                                                                                                                                  |
|-----|--------------------------------------------------------------------------------------------------------------------------------------------------------------------------------------------------------------------------------------------------------------------------------------------------------------------------------------------------------------------------------------------------------------------------------------------------------------------------------------------------------------------------------------------------------------------------------------------------------------------------------------------------------------------------------------------------------------------------------------------------------------------------------------------------------------------------------------------------|
|     | I chose this name because it shows a mix of the name of a person that I truly honor, as well as the continent of where this species is commonly found. The continent is South America, since frogs are known to be found in this continent, and the person I chose is named Selena Gomez. The reason why I honor her is because as a little girl, part of my personality evolved through her humour in series and movies she appeared in, and now as I am growing up, the person she truly is has grown on me. Throughout her life, she has suffered through lupus, which she is still fighting, as well as kidney transplants, and depression. She is a real example of what it is to stay strong and positive throughout the hardest situations we go encounter in our lives, therefore she will always be one of the people I honor the most. |
| 125 | <b>Tsuyu Asui</b> <i>Hylocirtus Asui</i>   Carolyn Junco, 14, American                                                                                                                                                                                                                                                                                                                                                                                                                                                                                                                                                                                                                                                                                                                                                                           |
|     | I choose to name this frog, Tsuyu Asui, after a fictional character. The character has frog like abilities such as being able to jump and hop far. In addition, she has a sticky tongue which she uses as a weapon or as a means to grab and carry objects. Also she can camouflage herself, secrete a liquid toxin, even wash out her stomach. Although the creator didn't base her off a specific type of frog, I decided it would be cool to name a frog after a frog like character.                                                                                                                                                                                                                                                                                                                                                         |
| 126 | <b>Different-eyed Frog</b>   Carter Spellman, 8, USA ●                                                                                                                                                                                                                                                                                                                                                                                                                                                                                                                                                                                                                                                                                                                                                                                           |
|     | I chose this name because it has different eye colors.                                                                                                                                                                                                                                                                                                                                                                                                                                                                                                                                                                                                                                                                                                                                                                                           |
| 127 | <b>Rainbow Water Frog</b> <i>Ecuadorian Hyloscirtus Frog</i>   Carter Kochan, 10, Canada ● ●                                                                                                                                                                                                                                                                                                                                                                                                                                                                                                                                                                                                                                                                                                                                                     |
|     | I chose the name Rainbow Water Frog because this frog changes different colours and likes the water. Then I chose the name Ecuadorian Hyloscirtus Frog because they found the frogs in Ecuador and also because the Hyloscirtus part is the species of the frogs that were found in Ecuador.                                                                                                                                                                                                                                                                                                                                                                                                                                                                                                                                                     |
| 128 | <b>Basylon Frog</b>   Carter Hayden, 12, USA                                                                                                                                                                                                                                                                                                                                                                                                                                                                                                                                                                                                                                                                                                                                                                                                     |
|     | Because I like the way the name has a big range of letters. This name sounds like a name that is easy to say and fun to spell.                                                                                                                                                                                                                                                                                                                                                                                                                                                                                                                                                                                                                                                                                                                   |
| 129 | <b>Spotted Plantain Frog</b> <i>musa</i>   Cecilia Souza, 16, USA ●                                                                                                                                                                                                                                                                                                                                                                                                                                                                                                                                                                                                                                                                                                                                                                              |
|     | I chose this common name and scientific name because both the male and female frogs reminded me of a banana. The male frog reminds me of a very ripe banana, and the female looks like a young banana fruit. The "spotted" part comes from the different spots the male had when camouflaging, and it reminds me of a super ripe banana or plantain. I chose "musa" as the second part of the scientific name because apparently banana in latin is "musa." I think this is a good name because it's descriptive, but should be easily remembered by most people.                                                                                                                                                                                                                                                                                |
| 130 | <b>Pepto-Bismol</b> <i>three frog</i>   chance simmons, 13, USA                                                                                                                                                                                                                                                                                                                                                                                                                                                                                                                                                                                                                                                                                                                                                                                  |
|     | cuz I did and cuz I can                                                                                                                                                                                                                                                                                                                                                                                                                                                                                                                                                                                                                                                                                                                                                                                                                          |
| 131 | <b>Hamilton Hoop Frog</b> <i>Hyloscirtus Hamiltonious Hoopae</i>   Charlie Fitzpatrick, Arielle Kalmar, Gus Garry, Rahm Bustan-Tsabar (4 kids worked together in their homeschool), 8, USA ●                                                                                                                                                                                                                                                                                                                                                                                                                                                                                                                                                                                                                                                     |
|     | We chose "Hamilton" because we are inspired by the story of Alexander Hamilton. Hamilton was an orphan and his hometown was devastated by a hurricane, yet despite these things he immigrated to America and became an important person in the shaping of American government. We think his story represents the importance of believing in yourself, never giving up, and how everyone can have a voice (not just those who are better off). Then, we chose "hoop" because we love basketball and how it can bring people together, and we wanted something in the name to signify the rounded fingertips of this new frog!                                                                                                                                                                                                                     |
| 132 | <b>Lily frog</b>   Charlotte Hess, 2, USA ●                                                                                                                                                                                                                                                                                                                                                                                                                                                                                                                                                                                                                                                                                                                                                                                                      |
|     | Because lily frog                                                                                                                                                                                                                                                                                                                                                                                                                                                                                                                                                                                                                                                                                                                                                                                                                                |
| 133 | <b>Spots Frog</b>   Charlotte Barr, 7, USA ●                                                                                                                                                                                                                                                                                                                                                                                                                                                                                                                                                                                                                                                                                                                                                                                                     |
|     | I chose this name because it has spots.                                                                                                                                                                                                                                                                                                                                                                                                                                                                                                                                                                                                                                                                                                                                                                                                          |
| 134 | <b>The Chameleon Frog</b> <i>Sacrorum</i>   Charlotte O'Neill, 20, United Kingdom                                                                                                                                                                                                                                                                                                                                                                                                                                                                                                                                                                                                                                                                                                                                                                |
|     | The colour changing ability of the frog is reminiscent of a well known animals. Most children/ people in general know what a chameleon is and know what it does. The most distinct feature of the chameleon as an animal is its colour changing ability. By naming the frog after this similar animal, you give information on its most distinctive behaviour just by mentioning its existence. This will grab people's attention and give them knowledge of the species, which could help in conservation efforts as people will be more likely to want to save the home of a species they know about.                                                                                                                                                                                                                                          |
| 135 | <b>Kiwi frog</b>   Charlotte Bazley, 25, England                                                                                                                                                                                                                                                                                                                                                                                                                                                                                                                                                                                                                                                                                                                                                                                                 |
|     | The frog looks like a kiwi and I think he likes to eat kiwis.                                                                                                                                                                                                                                                                                                                                                                                                                                                                                                                                                                                                                                                                                                                                                                                    |

 = Winner  
 = Runner-Up  
 = Contributor  
 = Finalist  
 = Semi-Finalist  
 = Special Recognition  
 = Science & Research Award  
 = Creativity Award  
 = Inspiring Conservation Award  
 = Junior Scientist Award (12 & under)

## Species Naming Competition Full List of Entries

|     |                                                                                                                                                                                                                                                                                                                                                                                                                                                                                                                                                                                                                                                                                                                                                                                                                                                                                                                                                                                                                                                                                                                 |
|-----|-----------------------------------------------------------------------------------------------------------------------------------------------------------------------------------------------------------------------------------------------------------------------------------------------------------------------------------------------------------------------------------------------------------------------------------------------------------------------------------------------------------------------------------------------------------------------------------------------------------------------------------------------------------------------------------------------------------------------------------------------------------------------------------------------------------------------------------------------------------------------------------------------------------------------------------------------------------------------------------------------------------------------------------------------------------------------------------------------------------------|
| 136 | <b>Tadpole</b> <i>Anura</i>   Cheyanne Melton, 15, Ontario Canada                                                                                                                                                                                                                                                                                                                                                                                                                                                                                                                                                                                                                                                                                                                                                                                                                                                                                                                                                                                                                                               |
|     | I picked this name because this frog has a scientific body witch was born to be a smart frog. I think this frog is going to like this scientific name that is Anura.                                                                                                                                                                                                                                                                                                                                                                                                                                                                                                                                                                                                                                                                                                                                                                                                                                                                                                                                            |
| 137 | <b>color changing tamarin frog</b>   Chloe Runk, 10, american ●                                                                                                                                                                                                                                                                                                                                                                                                                                                                                                                                                                                                                                                                                                                                                                                                                                                                                                                                                                                                                                                 |
|     | because it was an interesting name on it and after Tamarin ( a character in wings of fire ) who gives me courage that this name may win!                                                                                                                                                                                                                                                                                                                                                                                                                                                                                                                                                                                                                                                                                                                                                                                                                                                                                                                                                                        |
| 138 | <b>Chirping Squid Frog</b> <i>Hylocirtus minolligo</i>   Chloe Chui, 17, USA                                                                                                                                                                                                                                                                                                                                                                                                                                                                                                                                                                                                                                                                                                                                                                                                                                                                                                                                                                                                                                    |
|     | The frog has multiple appearances and it's skin seems to be similar to the texture of a squid when it is wet, and also shares characteristics with glass frogs, which are somewhat translucent like squids are. Additionally, the frog's sound is a distinctive chirping sound.                                                                                                                                                                                                                                                                                                                                                                                                                                                                                                                                                                                                                                                                                                                                                                                                                                 |
| 139 | <b>rain-cloud frog</b> <i>Hyloscirtus nubilum</i>   Christina Williams, 14, African American ●●                                                                                                                                                                                                                                                                                                                                                                                                                                                                                                                                                                                                                                                                                                                                                                                                                                                                                                                                                                                                                 |
|     | i choose this name because the frog lives in a rainy environment, with clouds all around.                                                                                                                                                                                                                                                                                                                                                                                                                                                                                                                                                                                                                                                                                                                                                                                                                                                                                                                                                                                                                       |
| 140 | <b>Pear Frog</b> <i>Hylosurtus Christopher</i>   Christopher Garcia, 14, USA                                                                                                                                                                                                                                                                                                                                                                                                                                                                                                                                                                                                                                                                                                                                                                                                                                                                                                                                                                                                                                    |
|     | Because the male kind of looks like a pear                                                                                                                                                                                                                                                                                                                                                                                                                                                                                                                                                                                                                                                                                                                                                                                                                                                                                                                                                                                                                                                                      |
| 141 | <b>Dracul</b> <i>rana del dragon ecuadoreno</i>   cissa palacios fuentes, 10, El Salvador ●●                                                                                                                                                                                                                                                                                                                                                                                                                                                                                                                                                                                                                                                                                                                                                                                                                                                                                                                                                                                                                    |
|     | yo escogí este nombre porque la estructura de la cabeza de la rana es como la care de un dragon y por qué la rana fue descubierta en ecuador                                                                                                                                                                                                                                                                                                                                                                                                                                                                                                                                                                                                                                                                                                                                                                                                                                                                                                                                                                    |
| 142 | <b>Dracul</b>   Cissa Palacios, 10, USA ●●                                                                                                                                                                                                                                                                                                                                                                                                                                                                                                                                                                                                                                                                                                                                                                                                                                                                                                                                                                                                                                                                      |
|     | mi rana se lama Dracul en nombre normal y en el nombre cientifica se lama mi rana , la rana del dragon ecuadoreno yo elegí este nombre porque la estructura de la cabeza de la rana es similar a la estructura de la cabeza de un dragon y por qué la rana fue descubierta en ecuador                                                                                                                                                                                                                                                                                                                                                                                                                                                                                                                                                                                                                                                                                                                                                                                                                           |
| 143 | <b>Speckled Pear/Speckled Pear Frog</b> <i>pirum maculosus</i>   Clodagh Cox, 17, Ireland/Irish                                                                                                                                                                                                                                                                                                                                                                                                                                                                                                                                                                                                                                                                                                                                                                                                                                                                                                                                                                                                                 |
|     | Because he looks like a funky little pear. :) And when he's camouflaged he looks all speckly, like a pear left out in the sun for too long haha.                                                                                                                                                                                                                                                                                                                                                                                                                                                                                                                                                                                                                                                                                                                                                                                                                                                                                                                                                                |
| 144 | <b>Snellen's Frog</b> <i>Hyloscirtus iuvenis</i>   Connor Davies, 22, United Kingdom ●●                                                                                                                                                                                                                                                                                                                                                                                                                                                                                                                                                                                                                                                                                                                                                                                                                                                                                                                                                                                                                         |
|     | The proposed common name 'Snellen's Frog' is derived from Herman Snellen - the ophthalmologist who created the standard letter chart used for eye tests. I decided on this name as it is a Snellen's test which determines if someone needs glasses - this is a nod to the group of species this frog shares it's range with/may be related to - glass frogs. It can also allude to the frog's big eyes and keen eyesight. On another level, if you are able to see a certain line on the Snellen chart you are said to have '20/20' vision - and this frog was discovered and will be named in 2020, a year in which a clear vision for the future is being discussed in light of the COVID pandemic. The scientific name is <i>Hyloscirtus iuvenis iuvenis</i> is Latin for 'young' or 'youth' and represents the young people who are taking action to protect the reserve where the frog is found, and the young people who are being asked to name it. It is named to reflect the power and the opportunity young people have to make their mark in the fight against the ecological crisis we are facing. |
| 145 | <b>Chameleon Cloud Frog</b> <i>Talpa Nubes Ranae</i>   Conor Boney, 12, North America ●●                                                                                                                                                                                                                                                                                                                                                                                                                                                                                                                                                                                                                                                                                                                                                                                                                                                                                                                                                                                                                        |
|     | Because it can change color and also it live in a habitat in the clouds.                                                                                                                                                                                                                                                                                                                                                                                                                                                                                                                                                                                                                                                                                                                                                                                                                                                                                                                                                                                                                                        |
| 146 | <b>Chameleon Frog</b>   Cooper Strand, 8, USA ●                                                                                                                                                                                                                                                                                                                                                                                                                                                                                                                                                                                                                                                                                                                                                                                                                                                                                                                                                                                                                                                                 |
|     | I chose this name because the skin can change color.                                                                                                                                                                                                                                                                                                                                                                                                                                                                                                                                                                                                                                                                                                                                                                                                                                                                                                                                                                                                                                                            |
| 147 | <b>Aqautican</b> <i>Talus aqautica</i>   Cooper Vroom, 9, USA ●                                                                                                                                                                                                                                                                                                                                                                                                                                                                                                                                                                                                                                                                                                                                                                                                                                                                                                                                                                                                                                                 |
|     | I chose it Aqautican because it would be one of the few frog didn't like water if it lives in the rainforest in Brazil and it was just an idea that I brainstormed up                                                                                                                                                                                                                                                                                                                                                                                                                                                                                                                                                                                                                                                                                                                                                                                                                                                                                                                                           |
| 148 | <b>Stoney Frog</b> <i>meridionali lapidibus oppresserunt ranae</i>   Corbin Skutt, 18, USA                                                                                                                                                                                                                                                                                                                                                                                                                                                                                                                                                                                                                                                                                                                                                                                                                                                                                                                                                                                                                      |
|     | The frog has squinty eyes, looks tame, and it's from South of the equator                                                                                                                                                                                                                                                                                                                                                                                                                                                                                                                                                                                                                                                                                                                                                                                                                                                                                                                                                                                                                                       |

 = Winner  
 = Runner-Up  
 = Contributor  
 = Finalist  
 = Semi-Finalist  
 = Special Recognition  
 = Science & Research Award  
 = Creativity Award  
 = Inspiring Conservation Award  
 = Junior Scientist Award (12 & under)



## Species Naming Competition Full List of Entries

|     |                                                                                                                                                                                                                                                                                                                                                                                                                                                                                                                                                                                                                                                                                                                                                                                                                                                                                                                                                                                                          |
|-----|----------------------------------------------------------------------------------------------------------------------------------------------------------------------------------------------------------------------------------------------------------------------------------------------------------------------------------------------------------------------------------------------------------------------------------------------------------------------------------------------------------------------------------------------------------------------------------------------------------------------------------------------------------------------------------------------------------------------------------------------------------------------------------------------------------------------------------------------------------------------------------------------------------------------------------------------------------------------------------------------------------|
| 149 | <b>Duck beak Frog</b>   Corinne Plante Fleurent, 17, Canada                                                                                                                                                                                                                                                                                                                                                                                                                                                                                                                                                                                                                                                                                                                                                                                                                                                                                                                                              |
|     | I think it's face kind of looks like a duck beak! It's also a cute name, and it's easy to remember. I'm not very good with Latin, but I think that the scientific name should be something revolving around the city near its discovery site.                                                                                                                                                                                                                                                                                                                                                                                                                                                                                                                                                                                                                                                                                                                                                            |
| 150 | <b>Rana cáscara de platano</b> <i>Hyloscirtus oxidasae</i>   Cristina Santonocito, 26, Italia ● ●                                                                                                                                                                                                                                                                                                                                                                                                                                                                                                                                                                                                                                                                                                                                                                                                                                                                                                        |
|     | La piel de esta rana se parece a la cáscara de un plátano. Al comienzo está verde, pero con el paso del tiempo se vuelve negra. Podríamos decir que la rana femenina es como una cáscara verde, mientras que aquella masculina es como una cáscara que ha empezado ya el proceso de pardeamiento y entonces está llena de puntitos marrones. Puesto que la enzima que se ocupa de este proceso se llama oxidasa, he intentado ajustar el nombre latín de manera que fuese llamativo en este sentido                                                                                                                                                                                                                                                                                                                                                                                                                                                                                                      |
| 151 | <b>Coronarana</b>   Cristofer (Bancroft ES) Reyes, 10, USA ●                                                                                                                                                                                                                                                                                                                                                                                                                                                                                                                                                                                                                                                                                                                                                                                                                                                                                                                                             |
|     | Elegí ese nombre por ser la rana de la época del coronavirus.                                                                                                                                                                                                                                                                                                                                                                                                                                                                                                                                                                                                                                                                                                                                                                                                                                                                                                                                            |
| 152 | <b>Gollum Anuran</b>   Cyprian Limo, 22, Kenya                                                                                                                                                                                                                                                                                                                                                                                                                                                                                                                                                                                                                                                                                                                                                                                                                                                                                                                                                           |
|     | Immediately I saw the eyes I thought it resembled gollum's eyes. Golly was the fictional character in Lord of the rings. Anuran on the other hand is the Latin word for frog.                                                                                                                                                                                                                                                                                                                                                                                                                                                                                                                                                                                                                                                                                                                                                                                                                            |
| 153 | <b>Leaf camouflage frog</b> <i>Hyloscirtus circumdigitum</i>   D AAKASH VARDHAN, 16, India                                                                                                                                                                                                                                                                                                                                                                                                                                                                                                                                                                                                                                                                                                                                                                                                                                                                                                               |
|     | I have chosen the common name as leaf camouflage frog, as I found it is safe, when on leaf. Specific epithet as circumdigitum due to its round finger tip.                                                                                                                                                                                                                                                                                                                                                                                                                                                                                                                                                                                                                                                                                                                                                                                                                                               |
| 154 | <b>Rana de pecas desvanecientes</b> <i>Hyloscirtus kereus folium</i>   Dagmar Pozo, 14, Ecuador                                                                                                                                                                                                                                                                                                                                                                                                                                                                                                                                                                                                                                                                                                                                                                                                                                                                                                          |
|     | Rana de pecas desvanecientes Para crear este nombre me base en la apariencia que tiene este anfibio ya que posee diversos puntos color café que se encuentran dispersos en todo su cuerpo, los cuales me dan la apariencia de ser pecas. De acuerdo a la información publicada, su piel actúa en forma de camuflaje para confundirse entre los árboles y hojas a modo de protección, por lo que al existir cambios en el ambiente su color se modifica pero sus manchas se mantienen, este es el motivo por el cual elegí la palabra desvanecientes. <i>Hyloscirtus kereus folium</i> En cuestión del nombre científico, la palabra kereus lo elegí por una onomatopeya japonesa, que representa el sonido típico de las ranas, que originalmente se pronuncia "kero". La rana hembra de esta especie tiene similitud a la de una hoja verde, mientras que el macho debido a sus manchas tiene el parecido a una hoja marchita. Por eso a elección de la palabra folium que en latín que significa hoja. |
| 155 | <b>Chical Spotted Beeper Frog</b> <i>Hyloscirtus Vita priore</i>   Daniel Imbert, 15, Dominican Republic ●                                                                                                                                                                                                                                                                                                                                                                                                                                                                                                                                                                                                                                                                                                                                                                                                                                                                                               |
|     | The spotted part of the name comes from its physical characteristics while the "Beeper" originates from the animal's unique sounds which to me sound like a succession of small beeps like those that come from a pager also known as a beeper.                                                                                                                                                                                                                                                                                                                                                                                                                                                                                                                                                                                                                                                                                                                                                          |
| 156 | <b>Sticky Frog</b> <i>Hyloscirtus Dendrobatidae</i>   Daniel Perez, 16, Dominican Republic                                                                                                                                                                                                                                                                                                                                                                                                                                                                                                                                                                                                                                                                                                                                                                                                                                                                                                               |
|     | The frog's fingers are extremely sticky with slimy poisonous mucus. It comes from their skin and since they aren't able to defend themselves their skin does so for them. You should choose my frog sense he has an epic name and is very well known already as a poisonous dart frog.                                                                                                                                                                                                                                                                                                                                                                                                                                                                                                                                                                                                                                                                                                                   |
| 157 | <b>Esmeralda Porosa</b> <i>Smepora</i>   Daniel Die, 18, Ecuador                                                                                                                                                                                                                                                                                                                                                                                                                                                                                                                                                                                                                                                                                                                                                                                                                                                                                                                                         |
|     | Elegí el nombre porque describe las características físicas, esta rana tiene un color verde esmeralda pero al mismo tiempo tiene una cualidad porosa en su piel. Las dos palabras vienen del esperanto [Sme] Esmeralda [pora] Porosa - Esmeralda Porosa                                                                                                                                                                                                                                                                                                                                                                                                                                                                                                                                                                                                                                                                                                                                                  |
| 158 | <b>Rana Hoja</b> <i>Hojus ranus</i>   Daniel Argudo, 18, Ecuador                                                                                                                                                                                                                                                                                                                                                                                                                                                                                                                                                                                                                                                                                                                                                                                                                                                                                                                                         |
|     | Elegí ese nombre, porque no el color de la rana es muy parecida a la de una hoja, por esta razón, me pareció correcto darle este singular nombre.                                                                                                                                                                                                                                                                                                                                                                                                                                                                                                                                                                                                                                                                                                                                                                                                                                                        |
| 159 | <b>Jackie's Reed Frog</b> <i>Hyperolius jackie</i>   Daniel Igirimbabazi, 25, Rwanda                                                                                                                                                                                                                                                                                                                                                                                                                                                                                                                                                                                                                                                                                                                                                                                                                                                                                                                     |
|     | It was based on careful review and explanation of its first identifier                                                                                                                                                                                                                                                                                                                                                                                                                                                                                                                                                                                                                                                                                                                                                                                                                                                                                                                                   |
| 160 | <b>Rana Tropical</b>   Daniela Gonzalez, 9, USA ●                                                                                                                                                                                                                                                                                                                                                                                                                                                                                                                                                                                                                                                                                                                                                                                                                                                                                                                                                        |
|     | 1. mi rana se llama rana tropical 2. elegi ese nombre porque vive en el tropico de carchi ecuador .                                                                                                                                                                                                                                                                                                                                                                                                                                                                                                                                                                                                                                                                                                                                                                                                                                                                                                      |
| 161 | <b>Larry</b>   Daniela De La Cruz, 11, California ●                                                                                                                                                                                                                                                                                                                                                                                                                                                                                                                                                                                                                                                                                                                                                                                                                                                                                                                                                      |
|     | I liked the name and if I ever got a frog I wanted to name it Larry                                                                                                                                                                                                                                                                                                                                                                                                                                                                                                                                                                                                                                                                                                                                                                                                                                                                                                                                      |

 = Winner  
 = Runner-Up  
 = Contributor  
 = Finalist  
 = Semi-Finalist  
 = Special Recognition  
 = Science & Research Award  
 = Creativity Award  
 = Inspiring Conservation Award  
 = Junior Scientist Award (12 & under)

## Species Naming Competition Full List of Entries

|     |                                                                                                                                                                                                                                                                                                                                                                                                                                                                                                                                                                                                                                                                                                                                                                                                                                                                                                                                                                                                                                                                                                                            |
|-----|----------------------------------------------------------------------------------------------------------------------------------------------------------------------------------------------------------------------------------------------------------------------------------------------------------------------------------------------------------------------------------------------------------------------------------------------------------------------------------------------------------------------------------------------------------------------------------------------------------------------------------------------------------------------------------------------------------------------------------------------------------------------------------------------------------------------------------------------------------------------------------------------------------------------------------------------------------------------------------------------------------------------------------------------------------------------------------------------------------------------------|
| 162 | <b>La rana de la verdad</b> <i>Hyloscirtus hylidae carchensis</i>   Daria Valentina Cabezas Ochoa, 14, Ecuador ●                                                                                                                                                                                                                                                                                                                                                                                                                                                                                                                                                                                                                                                                                                                                                                                                                                                                                                                                                                                                           |
|     | Yo le puse ese nombre común por la situación que estamos pasando, creo que hoy más que nunca debe existir la verdad y la honestidad entre todos nosotros, hasta en nuestros gobernantes. Si somos honestos, vamos a poder salir de esto, tal vez ya halla una cura para el Covid-19, y no es una vacuna, pero las personas no nos dicen la verdad, tenemos que ver por el bien de todos, no solo de algunos. Franz Suárez, uno de los 4 especialistas del mundo sobre metabolismo y sistema inmunológico, dice: “La verdad siempre triunfa.” Y esa es la realidad, a pesar de todo, la verdad siempre saldrá a la luz. En cambio, su nombre científico tiene algunos significados, Hyloscirtus es su género, hylidae significa que es una rana de torrente, que quiere decir que vive cerca de las corrientes de agua, por lo que pueden adherirse a diversas superficies. Y, por último, le puse carchensis porque fue encontrada en la provincia del Carchi, Ecuador.                                                                                                                                                    |
| 163 | <b>webbed frog</b> <i>pygmy ranae</i>   Delaney Moore, 12, Canada ●                                                                                                                                                                                                                                                                                                                                                                                                                                                                                                                                                                                                                                                                                                                                                                                                                                                                                                                                                                                                                                                        |
|     | The feet on this frog seem to be very wet and web like.                                                                                                                                                                                                                                                                                                                                                                                                                                                                                                                                                                                                                                                                                                                                                                                                                                                                                                                                                                                                                                                                    |
| 164 | <b>mahomes frog</b> <i>liv champions</i>   Delanie Ward, 14, USA                                                                                                                                                                                                                                                                                                                                                                                                                                                                                                                                                                                                                                                                                                                                                                                                                                                                                                                                                                                                                                                           |
|     | because it is unique and cool like me                                                                                                                                                                                                                                                                                                                                                                                                                                                                                                                                                                                                                                                                                                                                                                                                                                                                                                                                                                                                                                                                                      |
| 165 | <b>Little Minty</b>   Denise Murphy, 18, Ireland                                                                                                                                                                                                                                                                                                                                                                                                                                                                                                                                                                                                                                                                                                                                                                                                                                                                                                                                                                                                                                                                           |
|     | The resemblance to a mint bar which although mint is not native to this continent, it is to its nearest neighbour North America.                                                                                                                                                                                                                                                                                                                                                                                                                                                                                                                                                                                                                                                                                                                                                                                                                                                                                                                                                                                           |
| 164 | <b>Green Round Frog</b>   Deron Moon, 7, USA ●                                                                                                                                                                                                                                                                                                                                                                                                                                                                                                                                                                                                                                                                                                                                                                                                                                                                                                                                                                                                                                                                             |
|     | I chose this name because the frog is green and has round fingers.                                                                                                                                                                                                                                                                                                                                                                                                                                                                                                                                                                                                                                                                                                                                                                                                                                                                                                                                                                                                                                                         |
| 167 | <b>The torrent-covid frog</b> <i>Hyloscirtus torrens ranae</i>   Derrick Memusi, 16, Kenya ●                                                                                                                                                                                                                                                                                                                                                                                                                                                                                                                                                                                                                                                                                                                                                                                                                                                                                                                                                                                                                               |
|     | I chose the “Hyloscirtus torrens ranae” because the species lives near running water habitats, and no other hyloscirtus has the specific epithet like that one. I kindly request you to consider my submission because it will help scientist to perform their research effeciently without confusion.                                                                                                                                                                                                                                                                                                                                                                                                                                                                                                                                                                                                                                                                                                                                                                                                                     |
| 168 | <b>Black spotted mountain chicken</b> <i>jari bulat</i>   Devon Jones, 15, England                                                                                                                                                                                                                                                                                                                                                                                                                                                                                                                                                                                                                                                                                                                                                                                                                                                                                                                                                                                                                                         |
|     | I chose the common name for the physical features of its black spots and it’s location of mountains, and I chose chicken because of the females similar appearance to the mountain chicken. The Latin to my best knowledge means round finger.                                                                                                                                                                                                                                                                                                                                                                                                                                                                                                                                                                                                                                                                                                                                                                                                                                                                             |
| 169 | <b>Randall’s Torrent Frog</b> <i>Hyloscirtus lentiginosus</i>   Devyn Baron, 21, USA ●                                                                                                                                                                                                                                                                                                                                                                                                                                                                                                                                                                                                                                                                                                                                                                                                                                                                                                                                                                                                                                     |
|     | I wanted the name to be in respect to its physical appearance. At first I wanted to name it the freckled torrent frog because the small brown spots that cover most of the frog’s body really stood out to me. However, I found that most of the pictures were of males and the only pictures I could find of females showed frogs with no spots. In order to take into account the sexual dimorphism, I changed the common name but kept the latin name. The latin name comes from freckled in latin (‘et lentiginosus); however, this is based on google translate, so the latin name may have to be altered based on your translation. I have also seen sciat impetiginem, so the scientific name could be Hyloscirtus impetiginem. I changed the common name to Randall’s torrent frog, named after the character Randall Boggs from Monster’s inc. I chose this based on the frog’s facial features. The way their mouth is located under them and their pupil is skinny and horizontal make it look like the frog is squinting at you or suspicious of you. I thought his face looked very similar to Randall Boggs. |
| 170 | <b>okaka diana</b>   Diana Diaz, 9, okaland ●                                                                                                                                                                                                                                                                                                                                                                                                                                                                                                                                                                                                                                                                                                                                                                                                                                                                                                                                                                                                                                                                              |
|     | i choso this name because it is where we live in okaland also because it was in a cocon befor and okakais because coco is like kaka                                                                                                                                                                                                                                                                                                                                                                                                                                                                                                                                                                                                                                                                                                                                                                                                                                                                                                                                                                                        |
| 171 | <b>Ecuadorian Chirp Frog</b> <i>Hyloscirtus Stridunt</i>   Diana Perez, 17, Dominican Republic                                                                                                                                                                                                                                                                                                                                                                                                                                                                                                                                                                                                                                                                                                                                                                                                                                                                                                                                                                                                                             |
|     | The frog makes sounds more similar to those of a bird, than a croak. Specifying Ecuadorian allows people to easily remember the country that the frog is from, and distinguishes it from any other future frogs that may be named similarly.                                                                                                                                                                                                                                                                                                                                                                                                                                                                                                                                                                                                                                                                                                                                                                                                                                                                               |
| 172 | <b>Rana dedos redondos del Choco</b> <i>Chocoensis ranae</i>   Doménica Narváez, 14, Ecuador                                                                                                                                                                                                                                                                                                                                                                                                                                                                                                                                                                                                                                                                                                                                                                                                                                                                                                                                                                                                                               |
|     | Elegí este nombre porque describe a la rana, como su característica más significativa que son sus dedos con puntas redondas y en donde habita, porque existen muchas más ranas con los dedos redondos y se la puede confundir de entre las demás.                                                                                                                                                                                                                                                                                                                                                                                                                                                                                                                                                                                                                                                                                                                                                                                                                                                                          |

 = Winner  
 = Runner-Up  
 = Contributor  
 = Finalist  
 = Semi-Finalist  
 = Special Recognition  
 = Science & Research Award  
 = Creativity Award  
 = Inspiring Conservation Award  
 = Junior Scientist Award (12 & under)

## Species Naming Competition Full List of Entries

|                                                                                                                                                                                                                                                                                                                                                                                                                                                                                                                                                                                                                                                                                                                                                                                                                                                                                                                                                                                                                                                                                                                                                                                                                        |                                                                                                                                                                              |
|------------------------------------------------------------------------------------------------------------------------------------------------------------------------------------------------------------------------------------------------------------------------------------------------------------------------------------------------------------------------------------------------------------------------------------------------------------------------------------------------------------------------------------------------------------------------------------------------------------------------------------------------------------------------------------------------------------------------------------------------------------------------------------------------------------------------------------------------------------------------------------------------------------------------------------------------------------------------------------------------------------------------------------------------------------------------------------------------------------------------------------------------------------------------------------------------------------------------|------------------------------------------------------------------------------------------------------------------------------------------------------------------------------|
| 173                                                                                                                                                                                                                                                                                                                                                                                                                                                                                                                                                                                                                                                                                                                                                                                                                                                                                                                                                                                                                                                                                                                                                                                                                    | <b>Rana Nubular</b> <i>Hyloscirtus Nubilum</i>   Dominique Benítez, 14, Ecuador            |
| La “Reserva the youth land trust” ha dado una gran oportunidad a los jóvenes de 26 años e incluso menores, a estos a nombrar una nueva especie de rana de torrente, los científicos nos cuentan que la encontraron en el bosque nublado del Cocho del Ecuador, y esto me inspiró a proporcionarle este nombre “Nubular” se refiere a un poco una descripción del lugar donde fue encontrada, el bosque nublado, de aquí se viene el nombre, del mismo, esta especie tan solo al escucharlo pueden imaginarse varias ideas entre ellas, que viven en un clima nublado, su nombre científico se deriva del latín Hyloscirtus-su nombre científico oficial y Nubilum de su epíteto específico, este seudónimo lo he dado de acuerdo a mi creatividad e imaginación ya que a pesar de que no exista esta palabra puedo describir rápidamente su hábitat, pienso que las próximas generaciones deben tener muy en cuenta, que es importante el conservar las especies y nombrar en futuro a nuevas, este nombre es fácil de pronunciar, corto, original, creativo y simple al memorizar, con esto espero que les haya gustado mi nombre, y hayan entendido la razón del porque considero que se deba llamar “Rana nubular”. |                                                                                                                                                                              |
| 174                                                                                                                                                                                                                                                                                                                                                                                                                                                                                                                                                                                                                                                                                                                                                                                                                                                                                                                                                                                                                                                                                                                                                                                                                    | <b>Ecuadorian Tree Frog</b> <i>Hyloscirtus Nicolau</i>   Dominick Dupuy, 15, USA                                                                                             |
| I choose this name to commemorate Nikola Tesla’s legacy who made a large quantity of advancements in the production, transmission and application of electric power and water. Tesla invented and patented a one way valve without a mechanism that opens or closes making use of many fluid properties to make such an efficient design. Much like this valve, rivers are also a one-way street for water as if they can only travel in a single direction which reminds me of Hyloscirtus species nova due to their desired habitat. Frogs are symbolic of water and still experience electric pulses post-mortem so there is no better animal to commemorate Nikola Tesla than a newly discovered frog species.                                                                                                                                                                                                                                                                                                                                                                                                                                                                                                     |                                                                                                                                                                              |
| 175                                                                                                                                                                                                                                                                                                                                                                                                                                                                                                                                                                                                                                                                                                                                                                                                                                                                                                                                                                                                                                                                                                                                                                                                                    | <b>Choco frog</b> <i>Choco cloud frogo</i>   Duha Azaz, 11, USA                             |
| It was found in the the choco could forest and the word frogo will appeal to kids and make them want to learn more                                                                                                                                                                                                                                                                                                                                                                                                                                                                                                                                                                                                                                                                                                                                                                                                                                                                                                                                                                                                                                                                                                     |                                                                                                                                                                              |
| 176                                                                                                                                                                                                                                                                                                                                                                                                                                                                                                                                                                                                                                                                                                                                                                                                                                                                                                                                                                                                                                                                                                                                                                                                                    | <b>Lilly Green Frog</b>   Dylan Lauchman, 8, USA                                           |
| I chose this name because this frog is green and they jump on lilly pads.                                                                                                                                                                                                                                                                                                                                                                                                                                                                                                                                                                                                                                                                                                                                                                                                                                                                                                                                                                                                                                                                                                                                              |                                                                                                                                                                              |
| 177                                                                                                                                                                                                                                                                                                                                                                                                                                                                                                                                                                                                                                                                                                                                                                                                                                                                                                                                                                                                                                                                                                                                                                                                                    | <b>Cloud Forest-chameleon frog</b> <i>cutem color mutantur</i>   Dylan Hain, 12, Canada  |
| This frog lives in a cloud forest and its skin can change colour.                                                                                                                                                                                                                                                                                                                                                                                                                                                                                                                                                                                                                                                                                                                                                                                                                                                                                                                                                                                                                                                                                                                                                      |                                                                                                                                                                              |
| 178                                                                                                                                                                                                                                                                                                                                                                                                                                                                                                                                                                                                                                                                                                                                                                                                                                                                                                                                                                                                                                                                                                                                                                                                                    | <b>Ecuadorian Speckled Frog</b>   Dylan Humphreys, 14, United Kingdom (England)                                                                                              |
| I named it this because of the male specimen’s strikingly beautiful spotted back, and because of the old nursery rhyme, ‘Five little speckled frogs’.                                                                                                                                                                                                                                                                                                                                                                                                                                                                                                                                                                                                                                                                                                                                                                                                                                                                                                                                                                                                                                                                  |                                                                                                                                                                              |
| 179                                                                                                                                                                                                                                                                                                                                                                                                                                                                                                                                                                                                                                                                                                                                                                                                                                                                                                                                                                                                                                                                                                                                                                                                                    | <b>Midnight Torrent Frog</b> <i>Hyloscirtus centumnocte</i>   Dylan Indigo, 21, England  |
| According to the Doomsday clock, we are at 100 seconds to midnight, closer to global apocalypse than ever before. This beautiful new species deserves this name as it represents a region of the world known for its biodiversity, and threatened indigenous populations and ecosystems, but also hope and the power of collaboration. Physically, the speckles along the back of the frog resemble stars. The intention of suggesting this name is not so much to imply that we are doomed, but a message to future generations, a reminder of how close we came to devastation and a warning to keep us from ending up where we are now once again.                                                                                                                                                                                                                                                                                                                                                                                                                                                                                                                                                                  |                                                                                                                                                                              |
| 180                                                                                                                                                                                                                                                                                                                                                                                                                                                                                                                                                                                                                                                                                                                                                                                                                                                                                                                                                                                                                                                                                                                                                                                                                    | <b>night night frog</b>   Dyllan Alden, 6, USA                                            |
| because it sounds cool!                                                                                                                                                                                                                                                                                                                                                                                                                                                                                                                                                                                                                                                                                                                                                                                                                                                                                                                                                                                                                                                                                                                                                                                                |                                                                                                                                                                              |
| 181                                                                                                                                                                                                                                                                                                                                                                                                                                                                                                                                                                                                                                                                                                                                                                                                                                                                                                                                                                                                                                                                                                                                                                                                                    | <b>Leafy Frog</b>   Eb Ingalls, 5, USA                                                    |
| Because the frogs like leaves!                                                                                                                                                                                                                                                                                                                                                                                                                                                                                                                                                                                                                                                                                                                                                                                                                                                                                                                                                                                                                                                                                                                                                                                         |                                                                                                                                                                              |
| 182                                                                                                                                                                                                                                                                                                                                                                                                                                                                                                                                                                                                                                                                                                                                                                                                                                                                                                                                                                                                                                                                                                                                                                                                                    | <b>Forest Fog Frog</b> <i>Triple F</i>   Eden Haik-Reem, 11, Canada                       |
| In my opinion the new frog species name should be Forest Fog Frog. It describes its habitat. For example, it is from the cloud forest and in the cloud forest it’s very foggy. It also describes the species for example how it is a frog.                                                                                                                                                                                                                                                                                                                                                                                                                                                                                                                                                                                                                                                                                                                                                                                                                                                                                                                                                                             |                                                                                                                                                                              |
| 183                                                                                                                                                                                                                                                                                                                                                                                                                                                                                                                                                                                                                                                                                                                                                                                                                                                                                                                                                                                                                                                                                                                                                                                                                    | <b>amber spotted torrent frog</b> <i>maculosus</i>   Eden Shefsky, 16, Canada             |
| The common name comes from the general appearance of the frog, as it is seen to have amber spots in most pictures, and torrent frog comes from the type of frog it is. The scientific name comes from the latin word for spotted, maculosus means spotted, speckles or stained and I feel like each of those words encapsulates the pattern on this beautiful frog.                                                                                                                                                                                                                                                                                                                                                                                                                                                                                                                                                                                                                                                                                                                                                                                                                                                    |                                                                                                                                                                              |

 = Winner  
 = Runner-Up  
 = Contributor  
 = Finalist  
 = Semi-Finalist  
 = Special Recognition  
 = Science & Research Award  
 = Creativity Award  
 = Inspiring Conservation Award  
 = Junior Scientist Award (12 & under)

## Species Naming Competition Full List of Entries

|     |                                                                                                                                                                                                                                                                                                                                                                                                                                                                                                                                                                                                                                                                        |
|-----|------------------------------------------------------------------------------------------------------------------------------------------------------------------------------------------------------------------------------------------------------------------------------------------------------------------------------------------------------------------------------------------------------------------------------------------------------------------------------------------------------------------------------------------------------------------------------------------------------------------------------------------------------------------------|
| 184 | <b>Plant Life Frog</b> <i>Hyloscirtus herbivorous</i>   Edith Jordan, 6, USA 🟡                                                                                                                                                                                                                                                                                                                                                                                                                                                                                                                                                                                         |
|     | Because the frog loves plants and this is its habitat where it blends in.                                                                                                                                                                                                                                                                                                                                                                                                                                                                                                                                                                                              |
| 185 | <b>Brown-Spotted Lime Frog</b>   Eduardo Rivera, 14, USA                                                                                                                                                                                                                                                                                                                                                                                                                                                                                                                                                                                                               |
|     | I chose this name based on its appearance. The male, but mainly the female frogs look lime-colored when they're not camouflaged or spotted. Since they weren't always like that, I added Brown-Spotted to the front since they have brown spots sometimes.                                                                                                                                                                                                                                                                                                                                                                                                             |
| 186 | <b>Spotted Stream Frog</b> <i>Anura amnis</i>   Elaine Casas, 14, Hispanic                                                                                                                                                                                                                                                                                                                                                                                                                                                                                                                                                                                             |
|     | I choose this name because Anura (Hyloscirtus) is the genus to which it belongs to and amnis is stream in latin in which the frogs live and lay their eggs by.                                                                                                                                                                                                                                                                                                                                                                                                                                                                                                         |
| 187 | <b>poggers froggers</b>   Eleanor Andrade May, 17, United Kingdom                                                                                                                                                                                                                                                                                                                                                                                                                                                                                                                                                                                                      |
|     | it looks like a right poggers frog                                                                                                                                                                                                                                                                                                                                                                                                                                                                                                                                                                                                                                     |
| 188 | <b>The color changing tree frog</b>   Eli Anniss, 10, USA 🟡                                                                                                                                                                                                                                                                                                                                                                                                                                                                                                                                                                                                            |
|     | I named this because it changes its color to blend in with its area and just sounded right to me.                                                                                                                                                                                                                                                                                                                                                                                                                                                                                                                                                                      |
| 189 | <b>The color shifting tree frog</b>   Eli Anniss, 11, USA 🟡                                                                                                                                                                                                                                                                                                                                                                                                                                                                                                                                                                                                            |
|     | I thought that this name was fitting to the shifting of colors when it moves to a different area it changes its skin color.                                                                                                                                                                                                                                                                                                                                                                                                                                                                                                                                            |
| 190 | <b>Rana Gabi</b> <i>Hyloscirtus Gabeous</i>   Eliana Pico, 14, Ecuador                                                                                                                                                                                                                                                                                                                                                                                                                                                                                                                                                                                                 |
|     | Yo elegí este nombre porque me recordó a la película Río donde hay una rana venenosa que se llama así, además, que se me hace muy parecida, pero de otro color. Lo que más me llamó la atención para elegir este nombre es que tienen la textura de las patas similares y tienen colores donde se pueden camuflar muy fácilmente por ejemplo en las hojas o piedras. También me gustaría que se llame así porque me gusta cómo actúa el personaje la rana en la película de Río es como muy valiente y positiva por lo tanto para mí la nueva especie de rana debe tener un nombre llamativo donde las personas sepan que existe y comiencen a investigar sobre ellos. |
| 191 | <b>Tootsie</b>   Elijah Jones, Unspecified, USA                                                                                                                                                                                                                                                                                                                                                                                                                                                                                                                                                                                                                        |
|     | It's a goon name.                                                                                                                                                                                                                                                                                                                                                                                                                                                                                                                                                                                                                                                      |
| 192 | <b>olive green frog</b> <i>amphibious olive</i>   Elizabeth Coulter, 12, Canada 🟡                                                                                                                                                                                                                                                                                                                                                                                                                                                                                                                                                                                      |
|     | I chose this name because since the frog is green and brown I just mixed the color and the color was olive green. The reason for the scientific name was since frogs are amphibious and the color was olive green.                                                                                                                                                                                                                                                                                                                                                                                                                                                     |
| 193 | <b>Mr. Bean</b> <i>Bean</i>   Elizabeth Phillips, Unspecified, USA                                                                                                                                                                                                                                                                                                                                                                                                                                                                                                                                                                                                     |
|     | No sure why?                                                                                                                                                                                                                                                                                                                                                                                                                                                                                                                                                                                                                                                           |
| 194 | <b>Round-fingered Chocó frog</b>   Ella Peasgood, 14, England, UK                                                                                                                                                                                                                                                                                                                                                                                                                                                                                                                                                                                                      |
|     | I chose this name because this frog's round fingertips are what makes it distinguishable from other species of frogs. The word 'Chocó' comes from the name of its cloud forest habitat in the Chocó and Tropical Andes bioregion. The judging panel should consider this name as it makes it easier when identifying it as its appearance and habitat is in its name. The word Chocó automatically makes you think of the colour brown which is perfect as links to this species' brown spots on its body. The phrase 'Chocó frog' also makes this frog sound similar to the chocolate frog in Harry Potter.                                                           |
| 195 | <b>Cuttlefish frog</b> <i>Hyloscirtus invisibilia</i>   Ella Myers, 17, England                                                                                                                                                                                                                                                                                                                                                                                                                                                                                                                                                                                        |
|     | I chose this name because it represents the way it has adapted to camouflage itself from danger, just like the cuttlefish                                                                                                                                                                                                                                                                                                                                                                                                                                                                                                                                              |
| 196 | <b>E.T. Finger Frog</b>   Elle Gilleland, 20, USA                                                                                                                                                                                                                                                                                                                                                                                                                                                                                                                                                                                                                      |
|     | It's fingertips look like ET's from the movie E.T.                                                                                                                                                                                                                                                                                                                                                                                                                                                                                                                                                                                                                     |
| 197 | <b>western cloud burst frogs</b> <i>spanish = salvaje suroeste brillante niebla busto ranas   english = wild south western bright fog bust frogs   latin fera meridiem nebula clara imaginem ranae</i>   Ellie Douglas, 11, U.S. 🟢 🟡 🟠                                                                                                                                                                                                                                                                                                                                                                                                                                 |
|     | they are from Ecuador and Ecuador is in south America on the western edge hence the western and south western, they live in the cloud forest hence the cloud and they are bright ish colored hence the burst, the rain forest also has lots of bright flowers which helps give them the name and then they are frogs...                                                                                                                                                                                                                                                                                                                                                |
| 198 | <b>Ecuadorian Chirping Frog</b>   Elliot Monteith, 10, Canada 🟡                                                                                                                                                                                                                                                                                                                                                                                                                                                                                                                                                                                                        |

 = Winner  
 = Runner-Up  
 = Contributor  
 = Finalist  
 = Semi-Finalist  
 = Special Recognition  
 = Science & Research Award  
 = Creativity Award  
 = Inspiring Conservation Award  
 = Junior Scientist Award (12 & under)

## Species Naming Competition Full List of Entries

|     |                                                                                                                                                                                                                                                                                                                                                                                                                                                                                                                                                                                                                                                                                                                                                                                                                                                                                                                                                                                                                                                                                                                                                                                             |
|-----|---------------------------------------------------------------------------------------------------------------------------------------------------------------------------------------------------------------------------------------------------------------------------------------------------------------------------------------------------------------------------------------------------------------------------------------------------------------------------------------------------------------------------------------------------------------------------------------------------------------------------------------------------------------------------------------------------------------------------------------------------------------------------------------------------------------------------------------------------------------------------------------------------------------------------------------------------------------------------------------------------------------------------------------------------------------------------------------------------------------------------------------------------------------------------------------------|
|     | I chose this name because the frog comes from Ecuador and it makes a chirping noise like a bird.                                                                                                                                                                                                                                                                                                                                                                                                                                                                                                                                                                                                                                                                                                                                                                                                                                                                                                                                                                                                                                                                                            |
| 199 | <b>Lazarus Torrent Frog</b> ( <i>Hyloscirtus lazari</i> )   Elliot Connor, 17, Australia ●●●●                                                                                                                                                                                                                                                                                                                                                                                                                                                                                                                                                                                                                                                                                                                                                                                                                                                                                                                                                                                                                                                                                               |
|     | Lazarus is biology's metaphor for a dead animal living. Inspired by a Biblical allusion to a resurrected Saint, the term has come to mean much more: representing rediscovery against the odds, and the most unlikely of recoveries for species. Sadly it is a term we are seeing all the more often nowadays. The <i>Hyloscirtus</i> genus itself was reborn as recently as 2005 in a taxonomic restructuring of the Hylidae family. And as of yet, it seems that the newly discovered <i>Hyloscirtus</i> sp. may need all of the Lazarus auspices it can get to continue thriving in its tiny known range. All frogs are under threat from the deadly Bd chytrid fungus, from habitat loss, pollution and invasive predatory fish species amongst others. So I put forth this name as a statement of nature's resilience and the power for hope as expressed by the youth voices of today.                                                                                                                                                                                                                                                                                                |
| 200 | <b>Gunga Frog</b> <i>Ahmedbestae</i>   Elodie Cunningham, 24, United Kingdom                                                                                                                                                                                                                                                                                                                                                                                                                                                                                                                                                                                                                                                                                                                                                                                                                                                                                                                                                                                                                                                                                                                |
|     | In honour of Ahmed Best, the actor who portrayed the frog-like character Jar Jar Binks in the Star Wars franchise. He has bravely spoken out about how backlash against the character, characterised by (often racially motivated) abuse affected his mental health and led him to suicidal ideation. Since, he has become a tireless campaigner for mental health and racial justice, and deserves recognition for the froggy role that means so much to the many he has inspired.                                                                                                                                                                                                                                                                                                                                                                                                                                                                                                                                                                                                                                                                                                         |
| 201 | <b>Zara Mixtio</b>   Eloise Hletko Wood, 7, USA ●                                                                                                                                                                                                                                                                                                                                                                                                                                                                                                                                                                                                                                                                                                                                                                                                                                                                                                                                                                                                                                                                                                                                           |
|     | I thought it sounded pretty. I chose Mixtio because it means blend in Latin.                                                                                                                                                                                                                                                                                                                                                                                                                                                                                                                                                                                                                                                                                                                                                                                                                                                                                                                                                                                                                                                                                                                |
| 202 | <b>Sleepy-eyed Torrent Frog</b> <i>Fragaria</i>   Elsa Röed Enblom, 16, Sweden ●                                                                                                                                                                                                                                                                                                                                                                                                                                                                                                                                                                                                                                                                                                                                                                                                                                                                                                                                                                                                                                                                                                            |
|     | I chose the common name based on the fact that I think the frog has sort of sleepy-looking eyes. "Fragaria" is meant as a reference to a song cover called "Strawberry Frog" by @ratwyfe and @goodtimeal on TikTok. In addition to being a cute name, I also think it communicates something about Generation Z and our love for frogs as well as social media.                                                                                                                                                                                                                                                                                                                                                                                                                                                                                                                                                                                                                                                                                                                                                                                                                             |
| 203 | <b>glass frog</b> <i>speculum - rana</i>   elsabet bamako, 14, USA                                                                                                                                                                                                                                                                                                                                                                                                                                                                                                                                                                                                                                                                                                                                                                                                                                                                                                                                                                                                                                                                                                                          |
|     | I choose this name because speculum means glass in Latin and rana means frog in Latin                                                                                                                                                                                                                                                                                                                                                                                                                                                                                                                                                                                                                                                                                                                                                                                                                                                                                                                                                                                                                                                                                                       |
| 204 | <b>Round Toed Camo Frog</b> <i>Hyloscirtus caveatis Porcina</i>   Emilee McGirr, 10, Canada ●                                                                                                                                                                                                                                                                                                                                                                                                                                                                                                                                                                                                                                                                                                                                                                                                                                                                                                                                                                                                                                                                                               |
|     | I chose this because in the video it says that it is round toed and its skin colour can change.                                                                                                                                                                                                                                                                                                                                                                                                                                                                                                                                                                                                                                                                                                                                                                                                                                                                                                                                                                                                                                                                                             |
| 205 | <b>Hopehopsi</b>   Emilee Lord, 23, USA                                                                                                                                                                                                                                                                                                                                                                                                                                                                                                                                                                                                                                                                                                                                                                                                                                                                                                                                                                                                                                                                                                                                                     |
|     | I chose this name because it represents that hope exists—and acts—in many forms, including hopping like a frog. Every new species is a reminder for a continued and renewed commitment to the environment and that we should always be taking action in our hope for its preservation.                                                                                                                                                                                                                                                                                                                                                                                                                                                                                                                                                                                                                                                                                                                                                                                                                                                                                                      |
| 206 | <b>ChocóChips Frog</b> <i>Hyloscirtus scintillae</i>   Emilene Alexandra Erazo Morocho, 21, Ecuador                                                                                                                                                                                                                                                                                                                                                                                                                                                                                                                                                                                                                                                                                                                                                                                                                                                                                                                                                                                                                                                                                         |
|     | Creo que es importante recalcar que esta especie fue encontrada en la reserva del Chocó y de esta forma incentivar a más personas a cuidar este importante espacio del bosque nublado que corre peligro. Además, viendo las fotografías de esta especie, las manchas que tiene me recuerdan a chispas de chocolate o de menta (cuando cambia de color para camuflarse). Por eso, hice un juego de palabras donde Chocó es para recalcar en donde fue encontrada y Chips por sus características físicas. Traducí la palabra chispas al latín y me salió la palabra scintillae, sin embargo, si ustedes saben una mejor traducción al latín del nombre que yo elegí me gustaría que me ayuden para que sea lo más agradable posible.                                                                                                                                                                                                                                                                                                                                                                                                                                                         |
| 207 | <b>Suas varietates suas</b>   Emilia Prier, 11, USA ●                                                                                                                                                                                                                                                                                                                                                                                                                                                                                                                                                                                                                                                                                                                                                                                                                                                                                                                                                                                                                                                                                                                                       |
|     | I chose this name because it means spots in Latin, and if you look close to the frog you can see spots.                                                                                                                                                                                                                                                                                                                                                                                                                                                                                                                                                                                                                                                                                                                                                                                                                                                                                                                                                                                                                                                                                     |
| 208 | <b>Triple C Camouflaged Frog</b> <i>Hylocirtus randallaetrium</i> o <i>Hylocirtus triumcamuflae</i>   Emilia Cáceres, 20, Ecuador ●                                                                                                                                                                                                                                                                                                                                                                                                                                                                                                                                                                                                                                                                                                                                                                                                                                                                                                                                                                                                                                                         |
|     | Escogí este nombre ya que, está ubicada en el Chocó ecuatoriano, provincia del Carchi, en la parroquia El Chical. Son tres C. Además vive en arroyos de agua en vertientes de la Cordillera de los Andes y tiene la habilidad de Camuflarse. Todo indica que la letra C está destinada a estar en el nombre de esta ranita. Además suena como el nombre de un superhéroe que puede camuflarse y salvar su hábitat de los malvados humanos que quieren destruirlo. La parte de "randallae" por Randall Boggs de Monster Inc. Aunque él es no es un superhéroe, también tiene las yemas de los dedos redondas, puede camuflarse cambiando de color y adherirse a las paredes!! Muy similares.. Seguro si Randall viviese en el Chocó sería del mismo color que estas ranitas, solo que en versión salamandra. Y "trium" por tres c. Por último si CC significa "candidata confirmada", Triple C, significa candidata confirmada con el nombre más cool ¿Qué más se puede pedir? Si no les gusta la parte de Randall, puede ser: <i>Hylocirtus triumcamuflae</i> . Con la misma explicación anterior, sin lo de Randall (: Este último es más parecido al nombre común e igual suena muy bien! |

 = Winner  
 = Runner-Up  
 = Contributor  
 = Finalist  
 = Semi-Finalist  
 = Special Recognition  
 = Science & Research Award  
 = Creativity Award  
 = Inspiring Conservation Award  
 = Junior Scientist Award (12 & under)



## Species Naming Competition Full List of Entries

|     |                                                                                                                                                                                                                                                                                                                                                                                                                                                                                                                                                                                                                                                                                                                                                                                                                                                                                                                |
|-----|----------------------------------------------------------------------------------------------------------------------------------------------------------------------------------------------------------------------------------------------------------------------------------------------------------------------------------------------------------------------------------------------------------------------------------------------------------------------------------------------------------------------------------------------------------------------------------------------------------------------------------------------------------------------------------------------------------------------------------------------------------------------------------------------------------------------------------------------------------------------------------------------------------------|
| 209 | <b>Rana colores</b> <i>Hyloscirtus colorum</i>   Emily Merino, 13, Ecuador                                                                                                                                                                                                                                                                                                                                                                                                                                                                                                                                                                                                                                                                                                                                                                                                                                     |
|     | Yo elegí este nombre porque, esta especie de rana puede cambiar de color, y a mí parecer esa es su característica más relevante, ya que hay varias especies con ojos grandes o yemas de los dedos redondas, pero muy pocas que cambien de color, esta fue la característica en la que me base, además es fácil distinguirla de otras especies por su increíble habilidad. También creo que esta característica es muy importante porque le ayuda a defenderse y ocultarse de los depredadores ya que la usa como camuflaje y mecanismo de defensa, porque se puede ocultar entre las hojas con sus característicos colores el verde limón y el café, estos colores son muy útiles porque su habitat es un bosque con hojas de diversos colores en los que se puede mesclar tranquilamente y ser pasada por alto por varios depredadores y cazadores que la quieran cazar , con diferentes propósitos.          |
| 210 | <b>Rana Fitzwilliam Darcy</b> <i>Hylocirtus Fitzguelmus Darcy</i>   Emily Jiménez, 14, Ecuador                                                                                                                                                                                                                                                                                                                                                                                                                                                                                                                                                                                                                                                                                                                                                                                                                 |
|     | Yo elegí este nombre porque es de mi personaje masculino favorito de un libro, el cual es un clásico que creo que la mayoría de gente lo ha leído; el libro es Orgullo y Prejuicio; el cual fue escrito por Jane Austen en 1813. Para la época en la que fue escrita esta obra está muy bien desarrollada tanto en los personajes como en los sucesos que pasan en el transcurso de la historia; yo elegí a este personaje porque se podría decir que es una persona muy inteligente, aunque un poco arrogante, también era muy noble, es sumamente educado ya que venía de una de las familias más importantes de donde se desarrolla la historia, lamentablemente debido a su orgullo casi pierde a Elizabeth Bennet (personaje femenino principal). En la historia nos vamos dando cuenta de como este personaje va cambiando debido a las diferentes situaciones que se le presentan a lo largo del libro. |
| 211 | <b>Andes Sticky Tree Frog</b> <i>Hyloscirtus Viscosi</i>   Emily Bennett, 23, English, United Kingdom ●                                                                                                                                                                                                                                                                                                                                                                                                                                                                                                                                                                                                                                                                                                                                                                                                        |
|     | Two reasons: I think it's important for the name to include its sticky super powers! This trait tells it apart from the others. I also feel it's important to include its location. The Andes is a very biologically diverse area that is under threat- I think it's important to educate people where these amazing species come from! And why we need to protect them!                                                                                                                                                                                                                                                                                                                                                                                                                                                                                                                                       |
| 212 | <b>Camoufroe</b> <i>monsanti</i>   Emily Legge, 24, English                                                                                                                                                                                                                                                                                                                                                                                                                                                                                                                                                                                                                                                                                                                                                                                                                                                    |
|     | Common name - I've spent this year working on statistical software with animal community data, which can get stressful and tedious. I chose a play on the word camouflage to relate to the colour changing skin of the frog and in thinking about the scientists who will be analysing the species data and writing reports on them, in the hopes that a pun name would make them smile during the work. Scientific name - This is in honour of their unique habitat in mountain rivers/streams and is the Latin translation of 'mountain swimmer' combined into a single word.                                                                                                                                                                                                                                                                                                                                |
| 213 | <b>The freckled choco frog</b> <i>Hyloscirtus nubes aquam</i> (Meaning the frog species and 'cloud water')   Emily Potts, 25, United Kingdom ●                                                                                                                                                                                                                                                                                                                                                                                                                                                                                                                                                                                                                                                                                                                                                                 |
|     | I chose this name because of the spots of its back but also because it lives in the Choco region. It also resembles the shape of the chocolate frog in Harry Potter                                                                                                                                                                                                                                                                                                                                                                                                                                                                                                                                                                                                                                                                                                                                            |
| 214 | <b>visio electri luscus arbor ranae</b>   Emilyn Henry, 11, USA ●                                                                                                                                                                                                                                                                                                                                                                                                                                                                                                                                                                                                                                                                                                                                                                                                                                              |
|     | I wanted to use something scientific sounding.                                                                                                                                                                                                                                                                                                                                                                                                                                                                                                                                                                                                                                                                                                                                                                                                                                                                 |
| 215 | <b>freckles lentigines</b>   Emma Spielman, 7, Costa Rica ●                                                                                                                                                                                                                                                                                                                                                                                                                                                                                                                                                                                                                                                                                                                                                                                                                                                    |
|     | I choose Lentigines because while the species changes colors it always keeps its freckles (spots on its skin).                                                                                                                                                                                                                                                                                                                                                                                                                                                                                                                                                                                                                                                                                                                                                                                                 |
| 216 | <b>Mud Touched</b> <i>luto tetigit</i>   Emma Spielman, 9, Costa Rica ●                                                                                                                                                                                                                                                                                                                                                                                                                                                                                                                                                                                                                                                                                                                                                                                                                                        |
|     | This frog shows points on his body almost like he loves to be in the mud!                                                                                                                                                                                                                                                                                                                                                                                                                                                                                                                                                                                                                                                                                                                                                                                                                                      |
| 217 | <b>Swiss Rio</b> <i>Urbs Helvetica</i>   Emma Schweiss, 12, USA                                                                                                                                                                                                                                                                                                                                                                                                                                                                                                                                                                                                                                                                                                                                                                                                                                                |
|     | I chose this name because It had the nickname for my last name and I dance at a dance school and we did a production that had a song in it about rio.                                                                                                                                                                                                                                                                                                                                                                                                                                                                                                                                                                                                                                                                                                                                                          |
| 218 | <b>Tropical trout frog</b> <i>mykiss</i>   Emmalyn Blair, 8, USA ●                                                                                                                                                                                                                                                                                                                                                                                                                                                                                                                                                                                                                                                                                                                                                                                                                                             |
|     | The spotted pattern on the back fo the frog made me think of a trout. Even though the spotted pattern was stronger with males, it is present in the females, just lighter. Also, the name of trout makes it similar to frogs that stick to wet surfaces like the Hylidae family of torrent frogs/.                                                                                                                                                                                                                                                                                                                                                                                                                                                                                                                                                                                                             |

 = Winner  
 = Runner-Up  
 = Contributor  
 = Finalist  
 = Semi-Finalist  
 = Special Recognition  
 = Science & Research Award  
 = Creativity Award  
 = Inspiring Conservation Award  
 = Junior Scientist Award (12 & under)

## Species Naming Competition Full List of Entries

|     |                                                                                                                                                                                                                                                                                                                                                                                                                                                                                                                                                                                                                                                                                                                                                                                              |
|-----|----------------------------------------------------------------------------------------------------------------------------------------------------------------------------------------------------------------------------------------------------------------------------------------------------------------------------------------------------------------------------------------------------------------------------------------------------------------------------------------------------------------------------------------------------------------------------------------------------------------------------------------------------------------------------------------------------------------------------------------------------------------------------------------------|
| 219 | <b>Rana de cristal millennial de yemas redondas</b> <i>Hylocirtus iuvenis</i>   Enmily Sánchez, 22, Ecuador 🟡 🟢                                                                                                                                                                                                                                                                                                                                                                                                                                                                                                                                                                                                                                                                              |
|     | El nombre común está inspirado en la especie y su pertenencia al género Centrolenidae (por esta razón, rana de cristal), también al hábitat en dónde se encuentra, en este caso la reserva que será creada por jóvenes (de ahí viene la palabra millennial) y por su particular característica en la yema de los dedos (rana de cristal millennial de yemas redondas) El epíteto para el nombre científico viene del latín “iuvenis” que significa juventud o joven, haciendo referencia al gran protagonismo actual que tenemos los jóvenes a favor de la biodiversidad y defensa de los derechos de la naturaleza.                                                                                                                                                                         |
| 220 | <b>Bird song frog</b> <i>hydo</i>   Enoch Adesegun, 10, Canada 🟡                                                                                                                                                                                                                                                                                                                                                                                                                                                                                                                                                                                                                                                                                                                             |
|     | because it is around water                                                                                                                                                                                                                                                                                                                                                                                                                                                                                                                                                                                                                                                                                                                                                                   |
| 221 | <b>Tropical Chocó Tree Frog</b> <i>Hylocirtus scelerisque</i>   Erika Teng Gui, 18, Philippines                                                                                                                                                                                                                                                                                                                                                                                                                                                                                                                                                                                                                                                                                              |
|     | I chose the name “Tropical Chocó Tree Frog” because this new species lives in the Tropical Andes and Chocó bioregion. “Choco”, which is short for “chocolate”, can also be used to resemble the frog’s little brown spots that remind me of chocolate chips! When translated to Latin, “Chocolate” becomes “scelerisque”, hence the scientific name “Hylocirtus scelerisque” that I came up with!                                                                                                                                                                                                                                                                                                                                                                                            |
| 222 | <b>Torrent prince frog</b>   Erin Tull, 14, USA 🟢 🟡 🟣                                                                                                                                                                                                                                                                                                                                                                                                                                                                                                                                                                                                                                                                                                                                        |
|     | This frog is a species of torrent frog, hence the first part of the name. I also believe frogs need some kind of cute name with in the species to help people really appreciate them, due to the fact that a lot of people are still grossed out by them. Frog also represent princes in famous fairytales like “The Princess and the Frog”. I have loved frogs from the moment I could crawl and feel that more people should appreciate the beauty found within the species.                                                                                                                                                                                                                                                                                                               |
| 223 | <b>stick frog</b> <i>stick frog</i>   Ethan DePalma, Unspecified, canada                                                                                                                                                                                                                                                                                                                                                                                                                                                                                                                                                                                                                                                                                                                     |
|     | because by the image of this frog it looks like a stick if it stretches out and the color of the frog looks like a stem.                                                                                                                                                                                                                                                                                                                                                                                                                                                                                                                                                                                                                                                                     |
| 224 | <b>Ta’arō Chocó Frog</b>   Eva Booth, 16, United Kingdom 🟡 🟣                                                                                                                                                                                                                                                                                                                                                                                                                                                                                                                                                                                                                                                                                                                                 |
|     | Ta’arō means “Hope” in Guarani - a language family in which the Awá language - Guajá - is a part of. Chocó is the name of a rainforest in Ecuador inside the Dracula Reserve, an area that is one of the most unique and biodiverse places in the world, in which this frog lives. Reserva and Rainforest Trust are aiming to create the world’s first youth funded nature reserve there, to try to preserve this vital ecosystem and protect the species and indigenous people (such as the Awá) that live there. Therefore this name means “Hope for the Chocó (Rainforest)”                                                                                                                                                                                                               |
| 225 | <b>Big Frog Green</b> <i>Slayerus Frogeus</i>   Evan Davis, 14, America                                                                                                                                                                                                                                                                                                                                                                                                                                                                                                                                                                                                                                                                                                                      |
|     | i chose the common and genus name in reference to a game cause I feel like there will be a lot of submissions regarding politics etc. as of now and it would be nice for it to be named something lighthearted instead. Id rather someone laugh at the name then have to think about it.                                                                                                                                                                                                                                                                                                                                                                                                                                                                                                     |
| 226 | <b>The Chameleon Frog</b>   Fabienne van Os, 17, The Netherlands                                                                                                                                                                                                                                                                                                                                                                                                                                                                                                                                                                                                                                                                                                                             |
|     | I read about their ability to adapt to their surroundings, so I linked it to a chameleon right away. Besides that, I think it’s a lovely new frog, and it should definitely receive a great name! Good luck with choosing :)                                                                                                                                                                                                                                                                                                                                                                                                                                                                                                                                                                 |
| 227 | <b>Richie</b> <i>Richie</i>   Fabricio Zavala, 23, Ecuador                                                                                                                                                                                                                                                                                                                                                                                                                                                                                                                                                                                                                                                                                                                                   |
|     | Porque es carchense, uno de los iconos más grandes que nos representa a nivel mundial al ecuador es Richard Carapaz, también del carchi.                                                                                                                                                                                                                                                                                                                                                                                                                                                                                                                                                                                                                                                     |
| 228 | <b>Ranita soro</b> <i>Hyloscirtus cucupuro</i>   Fanny Camino, Unspecified, Ecuador 🟡                                                                                                                                                                                                                                                                                                                                                                                                                                                                                                                                                                                                                                                                                                        |
|     | Vivo en una comuna llamada San Vicente de Cucupuro en Ecuador. Estamos descubriendo que podemos hacer turismo en la comuna a través de la escalada en roca. Con la finalidad de ayudar a las personas de la comuna a ser más conscientes en el cuidado de la fauna y flora que existe. Y también a promocionar la salud psicológica de las personas en general. A través de: la escalada, protección de las especies, psicoeducación de las personas utilizando técnicas de psicología como mindfulness, yoga, autoconocimiento. Observación de estrellas como técnica de relajación y aprendizaje. Todo lo escrito significa Cucupuro y quiero que la ranita sea nuestro principal motivación intrínseca para llevar a cabo este grandioso y beneficioso proyecto social para la humanidad. |

 = Winner  
 = Runner-Up  
 = Contributor  
 = Finalist  
 = Semi-Finalist  
 = Special Recognition  
 = Science & Research Award  
 = Creativity Award  
 = Inspiring Conservation Award  
 = Junior Scientist Award (12 & under)

## Species Naming Competition Full List of Entries

|     |                                                                                                                                                                                                                                                                                                                                                                                                                                                                                                                                                                                                                                                                                                                                                                                                                                                                                                                                                                                                                                                                                                                                                                                                                                                                                                                                                                                                                                                                                                                                                                                                   |
|-----|---------------------------------------------------------------------------------------------------------------------------------------------------------------------------------------------------------------------------------------------------------------------------------------------------------------------------------------------------------------------------------------------------------------------------------------------------------------------------------------------------------------------------------------------------------------------------------------------------------------------------------------------------------------------------------------------------------------------------------------------------------------------------------------------------------------------------------------------------------------------------------------------------------------------------------------------------------------------------------------------------------------------------------------------------------------------------------------------------------------------------------------------------------------------------------------------------------------------------------------------------------------------------------------------------------------------------------------------------------------------------------------------------------------------------------------------------------------------------------------------------------------------------------------------------------------------------------------------------|
| 229 | <b>Ecuadorian Chameleon Frog</b> <i>Mutatiuc Speculoranae</i>   Felipe Carrillo Alume, 15, Dominican Republic                                                                                                                                                                                                                                                                                                                                                                                                                                                                                                                                                                                                                                                                                                                                                                                                                                                                                                                                                                                                                                                                                                                                                                                                                                                                                                                                                                                                                                                                                     |
|     | When choosing the new species name I had many options in mind, I could use the sound it made, the specific body characteristics, and many other details that were stated, but I decided to go with the Ecuadorian chameleon frog. I chose this name to clearly show the nationality of the new species, where it comes from, and a specific characteristic about the frog that makes it unique, like the way its skin can change color as its environment changes, and obviously the type of animal it is at the end. It looks like a simple name but I truly believe that it displays the frog as it is and when I thought about it, I knew it was the one. For the scientific name, it became a little more complicated. I was confused at first with how to create the name with the genus and the epithet since I really don't know what those words meant and how to actually create one. Right now I still believe that it is incorrect in a way but I am happy with the way the name turned out. Like in the common name, I decided to use a specific ability of the frog for the genus of the name. I combined the two words, hue (huc in Latin) and change (mutatio in Latin) together to form Mutatiuc. For the epithet of the name, I decided to do it simply and just go with basic characteristics. Near the beginning of the document, it talks about how this frog is similar to the glass frogs and I just decided to use that word but in Latin (Speculo-ranae). I am happy and proud of the way my names turned out and I can't wait to see what the frog is going to be named. |
| 230 | <b>Tamya del Chical</b> <i>puyucircumdigitus</i>   Felipe Quiñonez, 19, Ecuador ● ● ●                                                                                                                                                                                                                                                                                                                                                                                                                                                                                                                                                                                                                                                                                                                                                                                                                                                                                                                                                                                                                                                                                                                                                                                                                                                                                                                                                                                                                                                                                                             |
|     | El nombre común Tamya del Chical lo escogí porque su hábitat es el bosque nublado, además las culturas ancestrales creían que los anfibios tenían una estrecha relación con la lluvia, tamya significa lluvia en kichwa y del Chical porque la rana vive cerca a esta comunidad de personas que se han interesado en su conservación y también es el punto de referencia para localiza a esta rana. Por otro lado, el nombre científico me encantaría que sea Hyloscirtus puyucircumdigitus, de igual manera tiene la palabra puyu que significa niebla en Kichwa que representa al ecosistema donde esta especie vive, esto junto a circum que significa redondo en latín y digitus que significa dedo en latín, ya que es una de sus principales características.                                                                                                                                                                                                                                                                                                                                                                                                                                                                                                                                                                                                                                                                                                                                                                                                                               |
| 231 | <b>Chirping Gecko Frog</b> <i>Hyloscirtus Minurrito Migale Ranae</i>   Felix Hennigar, 10, USA ●                                                                                                                                                                                                                                                                                                                                                                                                                                                                                                                                                                                                                                                                                                                                                                                                                                                                                                                                                                                                                                                                                                                                                                                                                                                                                                                                                                                                                                                                                                  |
|     | Because The Frog chirps like a bird and has sticky pads that work like and look like a Gecko's pads                                                                                                                                                                                                                                                                                                                                                                                                                                                                                                                                                                                                                                                                                                                                                                                                                                                                                                                                                                                                                                                                                                                                                                                                                                                                                                                                                                                                                                                                                               |
| 232 | <b>Freckled frog</b> <i>Hylocirtus lenticula</i>   Felix Rowan-Young, 21, United Kingdom                                                                                                                                                                                                                                                                                                                                                                                                                                                                                                                                                                                                                                                                                                                                                                                                                                                                                                                                                                                                                                                                                                                                                                                                                                                                                                                                                                                                                                                                                                          |
|     | Looking at the frog's morphology, the male has pleasing brown flecks all over its body. Although the female lacks these markings, many species have been named after characteristics of only one of the sexes dimorphism. Freckles are usually associated with children/young people and so is an appropriate way to give tribute to Reserva Youth Land Trust. The word 'lenticular' has a few meanings, one of which being a type of cloud, and the frog's habitat is cloud forest. Another, the word derives from 'lentil-shaped' which is the shape of the frog's toes and is one of the defining features of the frog in the genus. It can also be interpreted as a type of eye-lens giving a nod to their striking eyes. Overall, I tried to think of a name that is simple, but also does justice by giving meaning, drawing inspiration from as many factors that make the species unique.                                                                                                                                                                                                                                                                                                                                                                                                                                                                                                                                                                                                                                                                                                 |
| 233 | <b>Circle-toed Tree Frog</b>   Finley McCullough, 7, USA ●                                                                                                                                                                                                                                                                                                                                                                                                                                                                                                                                                                                                                                                                                                                                                                                                                                                                                                                                                                                                                                                                                                                                                                                                                                                                                                                                                                                                                                                                                                                                        |
|     | I chose this because the frog has circle toes.                                                                                                                                                                                                                                                                                                                                                                                                                                                                                                                                                                                                                                                                                                                                                                                                                                                                                                                                                                                                                                                                                                                                                                                                                                                                                                                                                                                                                                                                                                                                                    |
| 234 | <b>Rana de torrente guerrera</b> <i>Hylocirtus awqaqii</i>   Francisco Velásquez, 21, Ecuador ●                                                                                                                                                                                                                                                                                                                                                                                                                                                                                                                                                                                                                                                                                                                                                                                                                                                                                                                                                                                                                                                                                                                                                                                                                                                                                                                                                                                                                                                                                                   |
|     | Del quechua guerrero o soldado, esta rana emblema puede ser el/la guerrerx emblema que encabeza esta lucha por la conservación.                                                                                                                                                                                                                                                                                                                                                                                                                                                                                                                                                                                                                                                                                                                                                                                                                                                                                                                                                                                                                                                                                                                                                                                                                                                                                                                                                                                                                                                                   |
| 235 | <b>lazy frog</b> <i>lazy frog</i>   Frank Chrisman, 12, Missouri ●                                                                                                                                                                                                                                                                                                                                                                                                                                                                                                                                                                                                                                                                                                                                                                                                                                                                                                                                                                                                                                                                                                                                                                                                                                                                                                                                                                                                                                                                                                                                |
|     | cuz in a few pics you can see that the frog likes to lay down sit back and watch the water fall                                                                                                                                                                                                                                                                                                                                                                                                                                                                                                                                                                                                                                                                                                                                                                                                                                                                                                                                                                                                                                                                                                                                                                                                                                                                                                                                                                                                                                                                                                   |
| 236 | <b>Rana de yemas redondas del Chical</b> <i>Hyloscirtus Chical</i>   Franklin Gomez, 23, Ecuador ●                                                                                                                                                                                                                                                                                                                                                                                                                                                                                                                                                                                                                                                                                                                                                                                                                                                                                                                                                                                                                                                                                                                                                                                                                                                                                                                                                                                                                                                                                                |
|     | Este nombre es tomado de la parroquia El Chical, lugar en el que habita esta rana.                                                                                                                                                                                                                                                                                                                                                                                                                                                                                                                                                                                                                                                                                                                                                                                                                                                                                                                                                                                                                                                                                                                                                                                                                                                                                                                                                                                                                                                                                                                |
| 237 | <b>Freckled torrent frog</b> <i>Hyloscirtus Ephelidis</i>   Frederica Schmidt, 19, Germany ●                                                                                                                                                                                                                                                                                                                                                                                                                                                                                                                                                                                                                                                                                                                                                                                                                                                                                                                                                                                                                                                                                                                                                                                                                                                                                                                                                                                                                                                                                                      |
|     | I thought about characteristics that make this frog special - what I mainly noticed were the rounded fingertips and the freckled skin, which both female and male frog share. It is a simple name, but it does a good job :) I am not sure about my Latin translation however, Epheliden is the word for freckles but I don't know how to find the right form. Thank you for the interesting information about the frog and have a nice day!                                                                                                                                                                                                                                                                                                                                                                                                                                                                                                                                                                                                                                                                                                                                                                                                                                                                                                                                                                                                                                                                                                                                                      |
| 238 | <b>lardamus frog</b> <i>lardamus cirtus</i>   Fynn Gilburn, 12, USA                                                                                                                                                                                                                                                                                                                                                                                                                                                                                                                                                                                                                                                                                                                                                                                                                                                                                                                                                                                                                                                                                                                                                                                                                                                                                                                                                                                                                                                                                                                               |
|     | because lard                                                                                                                                                                                                                                                                                                                                                                                                                                                                                                                                                                                                                                                                                                                                                                                                                                                                                                                                                                                                                                                                                                                                                                                                                                                                                                                                                                                                                                                                                                                                                                                      |
| 239 | <b>brown plump frog</b> <i>Hyloscirtus brownus plumpis</i>   Fynn Gilburn, 12, USA                                                                                                                                                                                                                                                                                                                                                                                                                                                                                                                                                                                                                                                                                                                                                                                                                                                                                                                                                                                                                                                                                                                                                                                                                                                                                                                                                                                                                                                                                                                |
|     | because it looks plump and brown                                                                                                                                                                                                                                                                                                                                                                                                                                                                                                                                                                                                                                                                                                                                                                                                                                                                                                                                                                                                                                                                                                                                                                                                                                                                                                                                                                                                                                                                                                                                                                  |

 = Winner  
 = Runner-Up  
 = Contributor  
 = Finalist  
 = Semi-Finalist  
 = Special Recognition  
 = Science & Research Award  
 = Creativity Award  
 = Inspiring Conservation Award  
 = Junior Scientist Award (12 & under)

## Species Naming Competition Full List of Entries

|     |                                                                                                                                                                                                                                                                                |
|-----|--------------------------------------------------------------------------------------------------------------------------------------------------------------------------------------------------------------------------------------------------------------------------------|
| 240 | <b>Fortus</b>   Gabriel Grossman, 7, USA ●                                                                                                                                                                                                                                     |
|     | It sounds like a frog name                                                                                                                                                                                                                                                     |
| 241 | <b>Ecuadorian Camo Frog</b> <i>Caveatis Porcina</i>   Gabriel Adams, 8, US ●                                                                                                                                                                                                   |
|     | It's skin looks like camouflage cloth.                                                                                                                                                                                                                                         |
| 242 | <b>Kermit la rana rené</b> <i>Sachatamia Hylorcirtus</i>   Gabriela Obando, 14, Ecuador                                                                                                                                                                                        |
|     | Porque es una rana y la rana más famosa que conozco es "Kermit" también conocido como "La rana rene" y porque forma parte de mi infancia.                                                                                                                                      |
| 243 | <b>Green Bone frog</b> <i>Greenius bonius</i>   Gemma Schwartz, 7, USA ●                                                                                                                                                                                                       |
|     | I chose this name because I did a lot of research all afternoon and the frog is green and it blends into a lot of things that are green and brown. And it's a glass frog so I thought it was the perfect name.                                                                 |
| 244 | <b>Round-toed Speckled Torrent Frog</b> <i>Arietes varios ranae</i>   Gemma Fletcher, 8, USA ●●●                                                                                                                                                                               |
|     | Because the round toes and speckles on the male frogs stood out to me, and the Latin name suits the common name for this frog.                                                                                                                                                 |
| 245 | <b>Foresta</b>   Giselle (Bancroft Elementary School) Aguirre, 10, USA ●                                                                                                                                                                                                       |
|     | Elegí ese nombre porque es verde y no es tan diferente del resto de ranas.                                                                                                                                                                                                     |
| 246 | <b>kirmit</b> <i>kirmity the frog</i>   grace mutphy, 12, canada ●                                                                                                                                                                                                             |
|     | i chose those names because kirmit sounded like a frog name and i found it was common and for the second name i just added onto the names and got kirmity the frog!                                                                                                            |
| 247 | <b>Hylocirtus forg</b> <i>prickel frog</i>   Grace Gerald Blowes, Unspecified, Canada                                                                                                                                                                                          |
|     | i choose this name because it has spots on them and spots and also be called prickles.                                                                                                                                                                                         |
| 248 | <b>Soot glass frog</b> <i>Hylocirtus kermitus</i>   Gracy Wah, 15, USA                                                                                                                                                                                                         |
|     | For the common name, soot came to me when I saw the skin of the frog (some covered with tiny spots) that reminded me of soot-covered grass. The species was named after Kermit the Frog because of its bright exterior and slit eyes.                                          |
| 249 | <b>Ecuadorian Impostor Ninja frog</b>   Grayden Seufferling, Unspecified, USA                                                                                                                                                                                                  |
|     | It can change colors somehow and they are a new species/ aka impostor.                                                                                                                                                                                                         |
| 250 | <b>Ecuadorian Green Dart</b>   Grayson Passanisi, 11, USA ●                                                                                                                                                                                                                    |
|     | I chose this name because it stood out to me as a frog ready to jump away from predators if they see past their camouflage.                                                                                                                                                    |
| 251 | <b>Phineas and Frog</b>   Griffin, Willow and Charlie Gilmartin, 11, USA ●●                                                                                                                                                                                                    |
|     | The cartoon characters Phineas and Ferb are scientist kid inventors and our heroes. We think children should be more recognized for being smart. Reserva gets it and is bringing together kids into the environment together and actually protecting it through kid donations. |
| 252 | <b>LAZARBEAM YEETEATER</b>   Gus Georgie, 26, North America                                                                                                                                                                                                                    |
|     | Because why not                                                                                                                                                                                                                                                                |
| 253 | <b>Gold singer</b> <i>Hylocirtus aurum cantorum</i>   Hadi Amer, 8, USA ●                                                                                                                                                                                                      |
|     | When I 1st listened to with a frog sound and sounded like a bird singing. Then I saw the spots on it and it looked like glitter. It reminded me of gold.                                                                                                                       |
| 254 | <b>Spotted Land Frog</b> <i>Limnodynastes tasmaniensis</i>   Hailey Hartmann - Harris, 12, Ontario, Canada ●                                                                                                                                                                   |
|     | because its the most commonly seen in my backyard by the lake                                                                                                                                                                                                                  |
| 255 | <b>Peebo Frog</b>   Hailey Grenier, 15, USA                                                                                                                                                                                                                                    |
|     | This frog definitely looks like a Peebo. the shape is friendly, and so is the name Peebo. Very friendly frog we have here.                                                                                                                                                     |
| 256 | <b>Free solo torrent frog</b> <i>Hylocirtus honnoldpiushanus</i>   Hana Kreže, 12, Slovenia ●●                                                                                                                                                                                 |
|     | Because it is sucked to the wall like Alex Honnold.                                                                                                                                                                                                                            |

 = Winner  
 = Runner-Up  
 = Contributor  
 = Finalist  
 = Semi-Finalist  
 = Special Recognition  
 = Science & Research Award  
 = Creativity Award  
 = Inspiring Conservation Award  
 = Junior Scientist Award (12 & under)

## Species Naming Competition Full List of Entries

|     |                                                                                                                                                                                                                                                                                                                                                                                                                                                                                                                                                                                                                                                                                                                                                                                                                                                                                                                                                                                                   |
|-----|---------------------------------------------------------------------------------------------------------------------------------------------------------------------------------------------------------------------------------------------------------------------------------------------------------------------------------------------------------------------------------------------------------------------------------------------------------------------------------------------------------------------------------------------------------------------------------------------------------------------------------------------------------------------------------------------------------------------------------------------------------------------------------------------------------------------------------------------------------------------------------------------------------------------------------------------------------------------------------------------------|
| 257 | <b>supertios</b> <i>hyloscirtus alexpetus</i>   Hanna Kreze, 12, Slovenia ●                                                                                                                                                                                                                                                                                                                                                                                                                                                                                                                                                                                                                                                                                                                                                                                                                                                                                                                       |
|     | because it's super frog                                                                                                                                                                                                                                                                                                                                                                                                                                                                                                                                                                                                                                                                                                                                                                                                                                                                                                                                                                           |
| 258 | <b>Toad Anna</b>   Hannah Bouadi, 6, USA ●                                                                                                                                                                                                                                                                                                                                                                                                                                                                                                                                                                                                                                                                                                                                                                                                                                                                                                                                                        |
|     | The name I chose is Annatoad. I chose this name because I wanted to name my frog species after me and Anna is the Latin for my name; Hannah.                                                                                                                                                                                                                                                                                                                                                                                                                                                                                                                                                                                                                                                                                                                                                                                                                                                      |
| 259 | <b>The Kettle Frog</b> <i>Lebes Frog</i>   Hannah Gould, 12, USA                                                                                                                                                                                                                                                                                                                                                                                                                                                                                                                                                                                                                                                                                                                                                                                                                                                                                                                                  |
|     | I Think the frog in a way looks like a rusty kettle.                                                                                                                                                                                                                                                                                                                                                                                                                                                                                                                                                                                                                                                                                                                                                                                                                                                                                                                                              |
| 260 | <b>Brown spotted singer</b>   Hannah Freundel, 15, USA                                                                                                                                                                                                                                                                                                                                                                                                                                                                                                                                                                                                                                                                                                                                                                                                                                                                                                                                            |
|     | The frog has brown spots and the sound it makes is a chirp that sounds almost like singing.                                                                                                                                                                                                                                                                                                                                                                                                                                                                                                                                                                                                                                                                                                                                                                                                                                                                                                       |
| 261 | <b>Round-Toed Smiling Frog</b> <i>rotundumrenidens</i>   Hannah McClellan, 19, USA                                                                                                                                                                                                                                                                                                                                                                                                                                                                                                                                                                                                                                                                                                                                                                                                                                                                                                                |
|     | I incorporated "Round-Toed" in the common name and "rotundum" in the scientific name to represent the frog's rounded toes, which set it apart from similar species. I called this frog the "Smiling Frog" because it appears to be smiling happily in every photo! This is represented by "renidens" in the scientific name, meaning "smiling" or "beaming." I want this frog's kind, sweet face to be captured in its name.                                                                                                                                                                                                                                                                                                                                                                                                                                                                                                                                                                      |
| 262 | <b>Green Ecuador Frog</b>   Harper Nesmith, 8, USA ●                                                                                                                                                                                                                                                                                                                                                                                                                                                                                                                                                                                                                                                                                                                                                                                                                                                                                                                                              |
|     | I chose this name because it lives in Ecuador and it is green.                                                                                                                                                                                                                                                                                                                                                                                                                                                                                                                                                                                                                                                                                                                                                                                                                                                                                                                                    |
| 263 | <b>Ghost-handed glassfrog</b> <i>Hylocirtus Viridenonfacile</i>   Heather McIntyre, 24, Canada                                                                                                                                                                                                                                                                                                                                                                                                                                                                                                                                                                                                                                                                                                                                                                                                                                                                                                    |
|     | The common name reflects the feature that made the frog visibly different from the other Hylocirtus frogs - its clear fingers. The other name was suggested by Dr Mark Scherz on Twitter, and it is supposed to mean "it's not easy being green" (Kermit from the Muppet's saying).                                                                                                                                                                                                                                                                                                                                                                                                                                                                                                                                                                                                                                                                                                               |
| 264 | <b>Geomortis</b> <i>Geomortis</i>   Heli Bonilla, 14, Ecuador ●                                                                                                                                                                                                                                                                                                                                                                                                                                                                                                                                                                                                                                                                                                                                                                                                                                                                                                                                   |
|     | El nombre Geomortis es un conjunto de palabras que ocultan un mensaje. Las palabras que lo componen es geo y mortis; geo es un prefijo que significa tierra, planeta tierra o globo terráqueo y mortis es un palabra en latín, que tienen como significado muerte. Estas palabras hacen referencia a la frase "El planeta Tierra se está muriendo"; por medio de este nombre hago un llamado a todos los jóvenes, niños y adultos a proteger a nuestro planeta, que día a día sigue muriendo por nuestra culpa y que nos suplica que la salvemos, que salvemos a cada especie que habita en ella; que dejemos de contaminarla y destruirla solo por nuestro beneficio. Nuestro segundo hogar nos necesita más que nunca y si no hacemos nada, este ira perdiendo su vida y con él muchas criaturas más. Existen muchas formas de aportar en esta lucha, podemos reciclar o donar dinero a diversas fundaciones que tienen como objetivo socorrer al planeta. En ti esta salvar al planeta Tierra. |
| 265 | <b>Concealed chirping frog</b> <i>Hyloscirtus celantur</i>   Henry Carver, 23, British                                                                                                                                                                                                                                                                                                                                                                                                                                                                                                                                                                                                                                                                                                                                                                                                                                                                                                            |
|     | I have suggested the name Concealed Chirp Frog because of the frogs ability to camouflage itself and therefore being able to conceal its position. What struck me about the frog was it's interesting croak which to me sounded more as if it were a cricket. I thought the sound was more of a crickets chirp than a frogs croak. These to me were very interesting characteristics of the frog.                                                                                                                                                                                                                                                                                                                                                                                                                                                                                                                                                                                                 |
| 266 | <b>Queer frog</b> <i>homosexualitatis admittendam Deus</i>   Holly Thornton, 12, Britan ●                                                                                                                                                                                                                                                                                                                                                                                                                                                                                                                                                                                                                                                                                                                                                                                                                                                                                                         |
|     | First of, I understand why this would be offensive, but it could also be considered inclusive. Also a lot of the LGBT community love frogs, and so do I, so please consider this                                                                                                                                                                                                                                                                                                                                                                                                                                                                                                                                                                                                                                                                                                                                                                                                                  |
| 267 | <b>Bronze Eye Glass frog</b> <i>Hyloscirtus Aes Oculi</i>   Hugo Treviño, 26, USA                                                                                                                                                                                                                                                                                                                                                                                                                                                                                                                                                                                                                                                                                                                                                                                                                                                                                                                 |
|     | I choose the name for the distinct bronze color in the Glass frogs eyes.                                                                                                                                                                                                                                                                                                                                                                                                                                                                                                                                                                                                                                                                                                                                                                                                                                                                                                                          |
| 268 | <b>Super Dope rainforest frog</b> <i>Hyloscirtus mashpi</i>   Ian Thornton, 14, USA                                                                                                                                                                                                                                                                                                                                                                                                                                                                                                                                                                                                                                                                                                                                                                                                                                                                                                               |
|     | I chose this name because I think all frogs are super dope.                                                                                                                                                                                                                                                                                                                                                                                                                                                                                                                                                                                                                                                                                                                                                                                                                                                                                                                                       |
| 269 | <b>Pointillist Jumper</b> <i>Pointileus Thorax Laneus</i>   Inés Wiechers, 16, Mexico                                                                                                                                                                                                                                                                                                                                                                                                                                                                                                                                                                                                                                                                                                                                                                                                                                                                                                             |
|     | I chose this name for two reasons. Firstly, looking at the dots and spots that cover the frog's whole body reminded me of the art technique known as pointillism, where artists create paintings or sketches by purely using dots of different sizes and colors. Thus, the 'pointillist' part of the name references this visual technique. Additionally, the second part of the name, 'jumper', is more playful and refers to its ability to jump, given that it is a frog. In essence, I believe that this name offers this species a unique sense of identity.                                                                                                                                                                                                                                                                                                                                                                                                                                 |

 = Winner  
 = Runner-Up  
 = Contributor  
 = Finalist  
 = Semi-Finalist  
 = Special Recognition  
 = Science & Research Award  
 = Creativity Award  
 = Inspiring Conservation Award  
 = Junior Scientist Award (12 & under)



## Species Naming Competition Full List of Entries

|     |                                                                                                                                                                                                                                                                                                                                                                                                                                                                                                                                                                                                                                                                                                                                                                                                        |
|-----|--------------------------------------------------------------------------------------------------------------------------------------------------------------------------------------------------------------------------------------------------------------------------------------------------------------------------------------------------------------------------------------------------------------------------------------------------------------------------------------------------------------------------------------------------------------------------------------------------------------------------------------------------------------------------------------------------------------------------------------------------------------------------------------------------------|
| 270 | <b>Rana kiwi de cristal</b> <i>Hylocirtus huapilalensis</i>   Inés Guerrero, 18, Ecuador ●                                                                                                                                                                                                                                                                                                                                                                                                                                                                                                                                                                                                                                                                                                             |
|     | Nombre común (rana kiwi de cristal): sus colores se asemejan a los de la fruta kiwi, con un subtono verde claro y pequeños puntitos en tonalidades cafés. Además, sus protuberancias le dan una apariencia texturizada que también comparte con la fruta. De cristal porque comparte el brillo y transparencia característico de otras ranas de cristal. Nombre científico ( <i>Hylocirtus huapilalensis</i> ): debido a la Quebrada El Huapilal.                                                                                                                                                                                                                                                                                                                                                      |
| 271 | <b>Ecuadorian vick frog</b> <i>Centrolenidae Tormota</i>   Isaac Lam, 11, canada ●                                                                                                                                                                                                                                                                                                                                                                                                                                                                                                                                                                                                                                                                                                                     |
|     | I chose this name because vick and vicus sound similar vicus means glass in Latin                                                                                                                                                                                                                                                                                                                                                                                                                                                                                                                                                                                                                                                                                                                      |
| 272 | <b>love life frog</b> <i>amor vitae ranae</i>   Isabel Cerda, 16, Dominican Republic                                                                                                                                                                                                                                                                                                                                                                                                                                                                                                                                                                                                                                                                                                                   |
|     | I chose this name because amor meaning love, vitae meaning life, and range mean frog in Latin. With this, I want to portray the idea of a frog that lives his fullest life out of love being the happiest frog and showing to all his family of frogs.                                                                                                                                                                                                                                                                                                                                                                                                                                                                                                                                                 |
| 273 | <b>rana de luz</b> <i>crystallinum medium lumen vitae</i>   Isabella Trujillo, 10, Ecuador ●                                                                                                                                                                                                                                                                                                                                                                                                                                                                                                                                                                                                                                                                                                           |
|     | crystallinum medium lumen vitae A mí me gustaría ponerle este nombre porque me parece una rana que irradia luz y vida en medio de la selva del Amazonas que nos muestran nueva vida en la naturaleza .Esta rana me parece que merece este nombre porque es pariente de las ranas de cristal, es una especie descubierta en Ecuador, pasa su vida en medio de la vida rodeando la selva del Amazonas luchando es como esperanza y perseverancia, esta rana me parece espectacular esta rana nos dice que tenemos que seguir con nuestro camino es como algo frágil que la vida nos da es la naturaleza creando nueva vida pasa en medio de todo un amazonas explorando , pasa por la línea de la naturaleza, es un nuevo mundo con más animales y por ese creo que merece este nombre. Gracias por leer |
| 274 | <b>tiny Andes treefrog</b> <i>rana minima</i>   isabella cirino, 13, australia                                                                                                                                                                                                                                                                                                                                                                                                                                                                                                                                                                                                                                                                                                                         |
|     | rana minima means tiny frog in latin and Tiny Andes Treefrog is pretty self explanatory                                                                                                                                                                                                                                                                                                                                                                                                                                                                                                                                                                                                                                                                                                                |
| 275 | <b>Carchi speckled torrent frog</b> <i>Flavolorum flumenmirantibus</i> ( <i>yellow bridled river wonder</i> )   Isabella Shorrock, 17, United Kingdom, English ● ●                                                                                                                                                                                                                                                                                                                                                                                                                                                                                                                                                                                                                                     |
|     | There are several reasons why I found this name fitting; I firstly found it wonderful and intriguing how such a little species could survive harsh river torrents, and thought that it would be fitting to commemorate it's wonder and resilience within the name. Wonder also alludes to the incredible fact that new species are still being discovered to this day, and there is much more to yet learn about the natural world. I think that the speckled brown against the green skin, and bright yellow head markings are very charismatic, and are both notable features of the frog, with the thin yellow outline of the head resembling a bridle, or reins. The speckles present on both male and female individuals is a unifying feature between both sexes.                                |
| 276 | <b>Mountain Cloud Frog</b>   Isadora Greene, 7, USA ● ●                                                                                                                                                                                                                                                                                                                                                                                                                                                                                                                                                                                                                                                                                                                                                |
|     | Because the frog lives in cloudy mountains.                                                                                                                                                                                                                                                                                                                                                                                                                                                                                                                                                                                                                                                                                                                                                            |
| 277 | <b>Slygway</b> <i>Slygway Mangifera</i>   Itikaas Ranjith, 10, India ●                                                                                                                                                                                                                                                                                                                                                                                                                                                                                                                                                                                                                                                                                                                                 |
|     | My common name for this new species of frog is like this, in Kung Fu Panda(movie) there is a character called Oogway who is a tortoise. His skin, eyes and the frog's skin and eyes are pretty similar. And another reason is that, This frog looks very sly and is as patient as a ninja. My scientific name for this new species of frog is because the female frog looks like a green mango. Thank You                                                                                                                                                                                                                                                                                                                                                                                              |
| 278 | <b>Speckled Dubyk</b> <i>Hylocirtus Arietes Varios quercus</i>   Ivanna Tymczyszyn, 14, British                                                                                                                                                                                                                                                                                                                                                                                                                                                                                                                                                                                                                                                                                                        |
|     | I named it speckled after its beautiful spotted skin and 'Dubyk' after my mother's family name which, in Ukrainian, means Little Oak and I think that the frogs are like little oaks colourwise - some are more on the brown side and some are more green. Therefore, the name not only describes the frog, but it also honours my family heritage.                                                                                                                                                                                                                                                                                                                                                                                                                                                    |
| 279 | <b>El Chical's frog</b>   J Ashley, 14, USA ● ●                                                                                                                                                                                                                                                                                                                                                                                                                                                                                                                                                                                                                                                                                                                                                        |
|     | I decided to name it after the town it was found closest to.                                                                                                                                                                                                                                                                                                                                                                                                                                                                                                                                                                                                                                                                                                                                           |
| 280 | <b>chameleon frog</b> <i>chamaeleonidae</i>   jack boyd, 11, USA ●                                                                                                                                                                                                                                                                                                                                                                                                                                                                                                                                                                                                                                                                                                                                     |
|     | because it is like a chameleon                                                                                                                                                                                                                                                                                                                                                                                                                                                                                                                                                                                                                                                                                                                                                                         |
| 281 | <b>Charci Chroma frog</b> <i>Flammantia lumina torquens</i>   Jack Strickland, 14, England                                                                                                                                                                                                                                                                                                                                                                                                                                                                                                                                                                                                                                                                                                             |
|     | Heterochromia meaning two different coloured eyes shows the difference in facial feature from the male and female                                                                                                                                                                                                                                                                                                                                                                                                                                                                                                                                                                                                                                                                                      |

 = Winner  
 = Runner-Up  
 = Contributor  
 = Finalist  
 = Semi-Finalist  
 = Special Recognition  
 = Science & Research Award  
 = Creativity Award  
 = Inspiring Conservation Award  
 = Junior Scientist Award (12 & under)

## Species Naming Competition Full List of Entries

|     |                                                                                                                                                                                                                                                                                                                                                                                                                                                                                                                                                                                                                                                                                                                                                                                                                                                                              |
|-----|------------------------------------------------------------------------------------------------------------------------------------------------------------------------------------------------------------------------------------------------------------------------------------------------------------------------------------------------------------------------------------------------------------------------------------------------------------------------------------------------------------------------------------------------------------------------------------------------------------------------------------------------------------------------------------------------------------------------------------------------------------------------------------------------------------------------------------------------------------------------------|
| 282 | <b>Brown Speckled Glassfrog</b> <i>brunetusmaculosus</i>   Jack Booth, 15, Wales                                                                                                                                                                                                                                                                                                                                                                                                                                                                                                                                                                                                                                                                                                                                                                                             |
|     | I chose to name the new species of frog Brown Speckled Glassfrog or <i>Hylocirtus brunetusmaculosus</i> because I thought it necessary to differentiate this frog from similar species sharing the same habitat and through looking at photos, both the male and female have a brown speckled back in most camouflage patterns (the female has far less than the male in most instances) whereas the Red-Spotted Glassfrog has red spots and the Pichincha Giant Glass Frog has light blue coloured speckles. Through giving the new species this scientific and common name it is easy to understand which frog is being spoken about while maintaining a highly relevant name as it's describing the frog's appearance. Lastly the species name is a true Latin name with <i>brunetus</i> meaning brown and <i>maculosus</i> meaning speckled rather than being latinized. |
| 283 | <b>Yellow striped tree frog</b>   Jacob Hess, 7, USA ●                                                                                                                                                                                                                                                                                                                                                                                                                                                                                                                                                                                                                                                                                                                                                                                                                       |
|     | Because the females have yellow stripes on their backs.                                                                                                                                                                                                                                                                                                                                                                                                                                                                                                                                                                                                                                                                                                                                                                                                                      |
| 284 | <b>chapple</b> <i>jacob</i>   jacob chapple, 13, Unspecified                                                                                                                                                                                                                                                                                                                                                                                                                                                                                                                                                                                                                                                                                                                                                                                                                 |
|     | becus i did                                                                                                                                                                                                                                                                                                                                                                                                                                                                                                                                                                                                                                                                                                                                                                                                                                                                  |
| 285 | <b>Rona frog</b> <i>ronais ranae</i>   Jacob Gay, 14, USA                                                                                                                                                                                                                                                                                                                                                                                                                                                                                                                                                                                                                                                                                                                                                                                                                    |
|     | Because we are in the middle of a pandemic named corona and this is a new species discovered during corona.                                                                                                                                                                                                                                                                                                                                                                                                                                                                                                                                                                                                                                                                                                                                                                  |
| 286 | <b>The cloaker frog</b>   Jade Foster, 7, USA ●                                                                                                                                                                                                                                                                                                                                                                                                                                                                                                                                                                                                                                                                                                                                                                                                                              |
|     | I chose this name because the frog can camouflage.                                                                                                                                                                                                                                                                                                                                                                                                                                                                                                                                                                                                                                                                                                                                                                                                                           |
| 287 | <b>Cinnamon</b>   Jaden Simpson, 11, Canada ●                                                                                                                                                                                                                                                                                                                                                                                                                                                                                                                                                                                                                                                                                                                                                                                                                                |
|     | I want to name the frog cinnamon because he looks like he has cinnamon on him                                                                                                                                                                                                                                                                                                                                                                                                                                                                                                                                                                                                                                                                                                                                                                                                |
| 288 | <b>Round-toed Waterdancer</b> <i>Saltator</i>   Jaden Daniels, 16, USA                                                                                                                                                                                                                                                                                                                                                                                                                                                                                                                                                                                                                                                                                                                                                                                                       |
|     | I chose this name for several reasons. For the first part of the name, the reason is that they have round toes on each of their feet which distinguishes them from other types of similar looking frogs. Another reason for that is because it's a pretty cute feature that should be noted. One reason for the second part of the name, waterdancer, is the fact that they can climb up walls, even when wet. That is absolutely astounding to me, even when I know some the science behind it. The last reason for the second part was for the fact that they look like they should be dancers with their strong, dancer-like legs. They look pretty elegant for a frog, and I think they should be uniquely named for that. Although the name is long, I think it resembles the entirety of the frog and its unique characteristics.                                      |
| 289 | <b>Frog pedumulentum</b>   Jai'than Dupre, 14, USA                                                                                                                                                                                                                                                                                                                                                                                                                                                                                                                                                                                                                                                                                                                                                                                                                           |
|     | I choose this name because of how the frogs feet look like so i think of it as sticky toes and thats where pedumulentum comes from                                                                                                                                                                                                                                                                                                                                                                                                                                                                                                                                                                                                                                                                                                                                           |
| 290 | <b>skinny frog</b> <i>smally</i>   jair leslie, 10, jamaica ●                                                                                                                                                                                                                                                                                                                                                                                                                                                                                                                                                                                                                                                                                                                                                                                                                |
|     | I describes the frog.                                                                                                                                                                                                                                                                                                                                                                                                                                                                                                                                                                                                                                                                                                                                                                                                                                                        |
| 291 | <b>The Farmie</b> <i>wartnose</i>   Jakob Anderson, 11, Canada ●                                                                                                                                                                                                                                                                                                                                                                                                                                                                                                                                                                                                                                                                                                                                                                                                             |
|     | I chose this name because it sounds cool and farms are nice big open spaces and I see lots of frogs a my grandparents farm, wartnose was just a cool twist to make it sound cool.                                                                                                                                                                                                                                                                                                                                                                                                                                                                                                                                                                                                                                                                                            |
| 292 | <b>Gamer frog</b> <i>venatus Hylocirtus</i>   jalen Gardner, 14, USA                                                                                                                                                                                                                                                                                                                                                                                                                                                                                                                                                                                                                                                                                                                                                                                                         |
|     | I choose this name because i spend hours a week gaming on my xbox and i wanted to show the world my love for e sports.                                                                                                                                                                                                                                                                                                                                                                                                                                                                                                                                                                                                                                                                                                                                                       |
| 293 | <b>Spotted Chameleon Frog</b> <i>varius chamaeleonidae anura</i>   James Martin, 10, U.S.A ●                                                                                                                                                                                                                                                                                                                                                                                                                                                                                                                                                                                                                                                                                                                                                                                 |
|     | Because it is spotted and can change color like a chameleon and it is a frog.                                                                                                                                                                                                                                                                                                                                                                                                                                                                                                                                                                                                                                                                                                                                                                                                |
| 294 | <b>Hylidae Fudge</b>   James Dougal, 14, Northern Ireland ●                                                                                                                                                                                                                                                                                                                                                                                                                                                                                                                                                                                                                                                                                                                                                                                                                  |
|     | I choose this name because my dog Fudge passed away recently me and him are and always will be best friends and I promised him something big in his honour before he passed I could think of any other way to put his name in it the species name and it still sound good so I just put this in. I thought this would be a good name because fudge being a chocolate and fudge my dog being a chocolate Labrador and it being in the Chocó bioregion I thought it would make sense chocó like chocolate it honestly was between this and Hylidae Tesla named after Nikola Tesla I hope you like my submission if I had to pick it it would be Hylidae Fudge but if you don't like that name just put it down as Hylidae Tesla - James                                                                                                                                        |

 = Winner  
 = Runner-Up  
 = Contributor  
 = Finalist  
 = Semi-Finalist  
 = Special Recognition  
 = Science & Research Award  
 = Creativity Award  
 = Inspiring Conservation Award  
 = Junior Scientist Award (12 & under)

## Species Naming Competition Full List of Entries

|     |                                                                                                                                                                                                                                                                                                                                                                                                                                                                                                                                                                                                                                                                                                                                                                                                                                                                                                                                                                                                                                                                                                                     |
|-----|---------------------------------------------------------------------------------------------------------------------------------------------------------------------------------------------------------------------------------------------------------------------------------------------------------------------------------------------------------------------------------------------------------------------------------------------------------------------------------------------------------------------------------------------------------------------------------------------------------------------------------------------------------------------------------------------------------------------------------------------------------------------------------------------------------------------------------------------------------------------------------------------------------------------------------------------------------------------------------------------------------------------------------------------------------------------------------------------------------------------|
| 295 | <b>The Haarlem Torrent Frog</b> <i>Hyloscirtus iuventorum</i>   James Miller, 18, UK                                                                                                                                                                                                                                                                                                                                                                                                                                                                                                                                                                                                                                                                                                                                                                                                                                                                                                                                              |
|     | Haarlem is a Dutch city in the Netherlands. Legend has it that the city of Haarlem was saved from being swept away by the sea by a young boy who plugged his finger in a leaking dike, and stayed there all night, in spite of the cold, until the villagers found him in the morning and plugged the gap. This serves as quite a nice metaphor, because just like the Dutch city of Haarlem, the frog is being saved by young people, who are determinedly stemming the loss of biodiversity until the adults wake up and fix the problem. Seeing as this frog is so unique in the way it is being named scientifically and in the way its home is being protected, I feel it might be nice to give it a name that honours that. The Latin name (I hope) means ‘Young People’s Torrent Frog’ which sounds better in Latin than in English!                                                                                                                                                                                                                                                                         |
| 296 | <b>Speckled Frog</b> <i>Hylocirtus Randallis</i>   Jamie Cruz, 14, USA                                                                                                                                                                                                                                                                                                                                                                                                                                                                                                                                                                                                                                                                                                                                                                                                                                                                                                                                                                                                                                              |
|     | For the common name, I chose to name it speckled frog since when analyzing all the photos above all of them have dots or big brown spots in their body hence the word speckled. The scientific name is a bit more creative because I used the first name of a character in a famous Disney movie. Randall Boggs is the chameleon-like animal featured in the movie Monster Inc who could make himself “invisible” according to his surroundings. I chose to put the name Randallis in the scientific name based on similarities that I saw with this frog. Above it mentions that this frog is able to change colors based on its environment changes if any. Just like Randall who changed colors to be able to get first place in screams, he would always change according to the “room” he would enter be it with the wall, rug, toys, etc. This is the reasoning and explanation behind the names that I chose for this frog.                                                                                                                                                                                  |
| 297 | <b>Water Frog</b> <i>H2O frog</i>   Jane Eidson, 13, USA                                                                                                                                                                                                                                                                                                                                                                                                                                                                                                                                                                                                                                                                                                                                                                                                                                                                                                                                                                                                                                                            |
|     | Because it sounded like it was near water, and it’s a frog, so.. Water Frog. And H2O is water, so... H2O Frog!                                                                                                                                                                                                                                                                                                                                                                                                                                                                                                                                                                                                                                                                                                                                                                                                                                                                                                                                                                                                      |
| 298 | <b>Glistening Grape (frog)</b> <i>Glossynura Moragammora</i>   Janiyah Sanders, 14, USA                                                                                                                                                                                                                                                                                                                                                                                                                                                                                                                                                                                                                                                                                                                                                                                                                                                                                                                                                                                                                             |
|     | I choose this name because of the frog’s glossy coat and because the female frog is the color of a fresh grape and the male frog is the color of a rotted grape.                                                                                                                                                                                                                                                                                                                                                                                                                                                                                                                                                                                                                                                                                                                                                                                                                                                                                                                                                    |
| 299 | <b>Froggy McFroggins</b> <i>booficus</i>   Jared Brannen, 22, USA                                                                                                                                                                                                                                                                                                                                                                                                                                                                                                                                                                                                                                                                                                                                                                                                                                                                                                                                                                                                                                                   |
|     | not naming it this would be the scientific misstep of the century. in an unprecedented year, why not make an unprecedented decision and name the frog Froggy McFroggins                                                                                                                                                                                                                                                                                                                                                                                                                                                                                                                                                                                                                                                                                                                                                                                                                                                                                                                                             |
| 300 | <b>CamoFrog</b>   Jasmin Viveiros, 15, Australia                                                                                                                                                                                                                                                                                                                                                                                                                                                                                                                                                                                                                                                                                                                                                                                                                                                                                                                                                                                                                                                                    |
|     | I chose this name because it is one of my favourite characters from animal crossing, even though it is a really basic name for a frog. When I played animal crossing they became my favourite character :)                                                                                                                                                                                                                                                                                                                                                                                                                                                                                                                                                                                                                                                                                                                                                                                                                                                                                                          |
| 301 | <b>Southern Camo Frog</b> <i>Hyloscirtus aequanativus</i>   Javier Miyar, 15, Dominican Republic                                                                                                                                                                                                                                                                                                                                                                                                                                                                                                                                                                                                                                                                                                                                                                                                                                                                                                                               |
|     | I choose the following names for the frogs because of various factors and characters of the frogs. First and foremost, I choose the common name of Southern Camo Frog. I choose this name because of where the frog resides, which is South America, therefore I included Southern to show its location. Furthermore, I added the second name due to one of its distinctive characteristics, its ability to adapt to the color of its environment, camouflaging themselves, and that is why the word camo is involved. Additionally, for the scientific name, I started with Hyloscirtus because that is required since it is the general name. However, for the scientific epithet, I decided to choose the name Hyloscirtus aequanativus. The scientific epithet is formed by two separate words, Ecuador, which translates to “Aequatoria”, and indigenous, that translates to “nativus”. I chose to incorporate Ecuador to show its location and where it resides, giving a much specific location, than the common name, and included indigenous, to show that its habitat is an indigenous region in Ecuador. |
| 302 | <b>Ecuadorian Roundtip</b> <i>Hyloscirtus strabismus</i>   Javier Wilson, 15, USA                                                                                                                                                                                                                                                                                                                                                                                                                                                                                                                                                                                                                                                                                                                                                                                                                                                                                                                                                                                                                                   |
|     | I chose the name Ecuadorian Roundtip as the common name because of its South American location and its physical abnormality of having round fingertips. Additionally, I chose the name Hyloscirtus strabismus because strabismus is a medical term for having a squint, and this specific frog seems to squint very frequently.                                                                                                                                                                                                                                                                                                                                                                                                                                                                                                                                                                                                                                                                                                                                                                                     |
| 303 | <b>Attenborough tree frog</b>   Jazmyn Timcke, 15, United Kingdom, England                                                                                                                                                                                                                                                                                                                                                                                                                                                                                                                                                                                                                                                                                                                                                                                                                                                                                                                                                       |
|     | In dedication to Sir David Attenborough. He has inspired me and I love what he does. When I am older I want to be just like him and help to save the planet. He is a great role model.                                                                                                                                                                                                                                                                                                                                                                                                                                                                                                                                                                                                                                                                                                                                                                                                                                                                                                                              |
| 304 | <b>Tulcan cutie frog</b> <i>Tulcan minora Hylocirtus</i>   Jazz Farini, 16, Australia                                                                                                                                                                                                                                                                                                                                                                                                                                                                                                                                                                                                                                                                                                                                                                                                                                                                                                                                                                                                                               |
|     | I chose it cause the frog looked really cute and small and I thought it should be named after the town it was near as it was their frog !                                                                                                                                                                                                                                                                                                                                                                                                                                                                                                                                                                                                                                                                                                                                                                                                                                                                                                                                                                           |

 = Winner  
 = Runner-Up  
 = Contributor  
 = Finalist  
 = Semi-Finalist  
 = Special Recognition  
 = Science & Research Award  
 = Creativity Award  
 = Inspiring Conservation Award  
 = Junior Scientist Award (12 & under)

## Species Naming Competition Full List of Entries

|     |                                                                                                                                                                                                                                                                                                                                                                                                                          |
|-----|--------------------------------------------------------------------------------------------------------------------------------------------------------------------------------------------------------------------------------------------------------------------------------------------------------------------------------------------------------------------------------------------------------------------------|
| 305 | <b>Rana rené</b> <i>Hyloscirtus renus</i>   Jean Rosero, 22, Ecuador                                                                                                                                                                                                                                                                                                                                                     |
|     | Es uno de los personajes más icónicos de la televisión. Considero que al nombrar a una rana como un personaje famoso atraerá atención de diferentes medios y generará interés en la ciencia.                                                                                                                                                                                                                             |
| 306 | <b>Rana de cristal de yemas redondas</b> <i>Hyloscirtus gammarotundus</i>   Jefferson Alexander Mora Ortega, 26, Ecuador                                                                                                                                                                                                                                                                                                 |
|     | gammarotundus por el latín gamma: yema rotundus: redondo Seleccione este nombre por la peculiar característica de esta especie que sus yemas son muy redondas comparando con sus vecinas, la rana de cristal gigante de Pichincha y la rana de cristal con manchas rojas.                                                                                                                                                |
| 307 | <b>Snoop</b> <i>Circumspecto</i>   Jenna Alexander, 15, USA                                                                                                                                                                                                                                                                                                                                                              |
|     | It was the name of a frog i had captured with my friend before i never heard from her since, and it has been in my mind for years. It brings back good memories and im sure she'd love to see a frog named after us wherever she might be.                                                                                                                                                                               |
| 308 | <b>Gripping Chameleon Frog</b> <i>Hyloscirtus camo</i>   Jennifer (Class 6-16) Milette, 11, Canada                                                                                                                                                                                                                                    |
|     | Because of its hands and the ability to camouflouge                                                                                                                                                                                                                                                                                                                                                                      |
| 309 | <b>Greenus</b> <i>Hylocirtus Greenus</i>   Jennifer Alvarado-Reyes, 14, USA                                                                                                                                                                                                                                                                                                                                              |
|     | I chose this name because I thought it was a good representation of what the frog looks like.                                                                                                                                                                                                                                                                                                                            |
| 310 | <b>Choco Bean</b>   Jennifer Hernandez, 17, USA                                                                                                                                                                                                                                                                                                                                                                          |
|     | “Choco” was chosen due to it being found in the Choco cloud forest of Ecuador. And “Bean” fits with it because the frogs’ eyes look like a cocoa bean. Cocoa beans grow in tropical areas such as the forests in Ecuador as well. So the name would represent the area in which it was found and it fits with the cocoa bean allusion.                                                                                   |
| 311 | <b>Sticky cinnamon bun torrent frog</b> <i>Amet pede circum regem</i>   Jess Pugh, 16, United Kingdom                                                                                                                                                                                                                                |
|     | The frog hold similarities to a sticky, cinnamon bun such as it looks similar, it is regarded as very sticky and it disappears all too easily.                                                                                                                                                                                                                                                                           |
| 312 | <b>Choco Torrent Frog</b>   Jesse Hicks, 26, Canada                                                                                                                                                                                                                                                                                   |
|     | Because it’s from choco and lives in the torrents                                                                                                                                                                                                                                                                                                                                                                        |
| 313 | <b>Amber-eyed children’s frog</b> <i>Hyloscirtus aurumoculus</i>   Jessica Mwangi, 15, Kenya                                                                                                                                                                                                                                                                                                                             |
|     | I chose this name because of the unique eye color the frog has and the scientists gave us,the children/youth a chance to name this frog.                                                                                                                                                                                                                                                                                 |
| 314 | <b>The frogulus</b> <i>Frogulusmogulustrogulusnogulustogulusroguluskogulushogulusbogulus</i>   Joe Borshky, 12, Canada                                                                                                                                                                                                              |
|     | Because scientists aren’t nice enough to choose this                                                                                                                                                                                                                                                                                                                                                                     |
| 315 | <b>Speckled Cloud Torrent Frog</b> <i>Hyloscirtus Nimbus</i>   Jonah McGrath, 9, USA                                                                       |
|     | I chose nimbus as the species name because the frog was discovered in the Choco cloud forest. I noticed that the frog is covered in brown “speckled” spots. I recently learned that raindrops form around a piece of dust, and a cloud is made up of millions of raindrops. So a cloud is “speckled” with brown spots, in a way. I used the word cloud in the common name because of where this new frog was discovered. |
| 316 | <b>Chadwick</b> <i>Hylocirtus Chadwickius</i>   Jonas Jacobson, 21, USA                                                                                                                                                                                                                                                                                                                                                  |
|     | In honor of Chadwick Boseman. Like the frog’s color changing skin, Boseman played many roles during his lifetime. They included Black Panther and Jackie Robinson. Although Boseman does not have an exact connection to the Carchi Provence, his reach was truly worldwide.                                                                                                                                             |
| 317 | <b>Gamabunta</b> <i>summonitores</i>   Jonathan Wood, 25, British                                                                                                                                                                                                                                                                                                                                                        |
|     | I chose this name based of the toads in Naruto that are summoned. One of the main toads is called Gamabunta and I chose summonitores for summoning as the toads in the series are summoned to help in battle.                                                                                                                                                                                                            |
| 318 | <b>Greenly</b>   Jonathan Borello, Unspecified, USA                                                                                                                                                                                                                                                                                                                                                                      |
|     | I like the color green that this frog is. I have never hear of a species that says green even though most frogs are green. Green is also my favorite color.                                                                                                                                                                                                                                                              |

 = Winner  
 = Runner-Up  
 = Contributor  
 = Finalist  
 = Semi-Finalist  
 = Special Recognition  
 = Science & Research Award  
 = Creativity Award  
 = Inspiring Conservation Award  
 = Junior Scientist Award (12 & under)

## Species Naming Competition Full List of Entries

|     |                                                                                                                                                                                                                                                                                                                                                                                                                                                                                                                                                                                                                                                                                                                                                                                                                                                                                                                                                                                                                                                                                                                                                              |
|-----|--------------------------------------------------------------------------------------------------------------------------------------------------------------------------------------------------------------------------------------------------------------------------------------------------------------------------------------------------------------------------------------------------------------------------------------------------------------------------------------------------------------------------------------------------------------------------------------------------------------------------------------------------------------------------------------------------------------------------------------------------------------------------------------------------------------------------------------------------------------------------------------------------------------------------------------------------------------------------------------------------------------------------------------------------------------------------------------------------------------------------------------------------------------|
| 319 | <b>The Persevering Round-Fingertipped Torrent Frog</b> <i>Hyloscirtus sphaerica-perseverantia</i>   Joohun Lee, 18, USA ●●                                                                                                                                                                                                                                                                                                                                                                                                                                                                                                                                                                                                                                                                                                                                                                                                                                                                                                                                                                                                                                   |
|     | The name of this frog, the Persevering Round-Fingertipped Torrent Frog, is two-fold in its purpose. Firstly, the name refers to the frog's charming rounded fingertips, a physical feature that makes it distinct from its close neighbors. Mentioning this special feature in the frog's name makes it apt for clear identification among potentially similar species. ("Sphaerica" means "pertaining to a sphere" or "spherical" in Latin.) Secondly, the name also refers to perseverance, which characterizes the frog and its discovery in a multiplicity of ways. The wisdom and curiosity of the researchers who ultimately found this frog; the work of those who tirelessly support the preservation and educational outreach of all wildlife; and even the frog's keen propensity for thriving in cloudy forests, all celebrate a spirit of perseverance. ("Perseverantia" means perseverance in Latin.) In combination, "sphaerica perseverantia" reads as "spherical perseverance."                                                                                                                                                              |
| 320 | <b>Flat-back frog</b> <i>Plana Retro Ranae</i>   Jose Gonzalez, 16, Dominican Republic                                                                                                                                                                                                                                                                                                                                                                                                                                                                                                                                                                                                                                                                                                                                                                                                                                                                                                                                                                                                                                                                       |
|     | I chose this name because in this picture the first thing that called my attention was this frog sits flat on its hands. Usually, frogs have a little bend on there back, but this one generally sits in a position that looks like a flat table. I picture frogs with a little hump on their back this is why this one called my attention so much.                                                                                                                                                                                                                                                                                                                                                                                                                                                                                                                                                                                                                                                                                                                                                                                                         |
| 321 | <b>Round-Cloud Tree Frog</b> <i>Hyloscirtus Stratocumulus</i>   José Armenteros, 15, Dominican Republic ●●                                                                                                                                                                                                                                                                                                                                                                                                                                                                                                                                                                                                                                                                                                                                                                                                                                                                                                                                                                                                                                                   |
|     | The "Tree Frog" part of the name is self-explanatory as the frog is considered as a part of the Hylidae family. I added it so that it would make identifying the frogs family easier. The "Round" bit I added because it is the shape of the frog's fingertips and this is an important aspect of the frog's as it is what mostly distinguishes it from its neighbouring glass frog relatives. It is also what allows it to stick to wet surfaces more easily than his close relative species, and that is a really significant trait of the frog when you consider its applications in a clod forest, the frog's only habitat. The "Cloud" bit of the name represents the frog's habitat, the cloud forest, which also happens to be a major reason for its evolving to develop the certain traits it did that distinguish it. For the epithet (second part of the scientific name), I chose the latin word stratocumulus. Stratocumulus means a large, round (which relates to the common name), clumped up cloud. I chose it because it also relates to the frog's unique habitat, the term resembles the mist that is often present in the cloud forest. |
| 322 | <b>Bad-lime Torrent Frog</b> <i>Hyloscirtus maluscinis</i>   Jose Rodolfo Rodriguez-Wehe, 16, USA ●                                                                                                                                                                                                                                                                                                                                                                                                                                                                                                                                                                                                                                                                                                                                                                                                                                                                                                                                                                                                                                                          |
|     | I chose the name of Bad-lime Torrent Frog for many reasons. First are foremost, the torrent frog part of the name is to indicate that the frog is a torrent and not a tree frog. The Bad-lime part of the name is where I decided to go a bit more creative. To begin with, the frog has the characteristic to change color, which we see in the images that were presented. The main colors viewed are brown and green, and sometimes a mix. At the same time, limes are green ,and when spoiled/bad, they start to become brown and form brown spots.                                                                                                                                                                                                                                                                                                                                                                                                                                                                                                                                                                                                      |
| 323 | <b>Black Mountain Leaf Hugger</b> <i>mikró vounó vátrachos</i>   Joseph wright, 16, USA                                                                                                                                                                                                                                                                                                                                                                                                                                                                                                                                                                                                                                                                                                                                                                                                                                                                                                                                                                                                                                                                      |
|     | I chose the common name because it mentioned that it live in parts of the Cerro Negro, and there was pictures of the frog an its always on a leaf and it lays its eggs on leaves as well. i chose the scientific name mikró vounó vátrachos because it translates to small mountain frog which is exactly what it is a tiny frog that lives in the tops of mountains                                                                                                                                                                                                                                                                                                                                                                                                                                                                                                                                                                                                                                                                                                                                                                                         |
| 324 | <b>The Brown Eyed Mask Frog</b>   Joslyn Anderson, 9, USA ●                                                                                                                                                                                                                                                                                                                                                                                                                                                                                                                                                                                                                                                                                                                                                                                                                                                                                                                                                                                                                                                                                                  |
|     | I chose this name because the frog has brown eyes and it uses camouflage to hide its self from predators. Another word for camouflage is mask so I chose that to make it shorter.                                                                                                                                                                                                                                                                                                                                                                                                                                                                                                                                                                                                                                                                                                                                                                                                                                                                                                                                                                            |
| 325 | <b>La rana grillo</b>   Juan (Bancroft ES) Sánchez, 10, USA ●                                                                                                                                                                                                                                                                                                                                                                                                                                                                                                                                                                                                                                                                                                                                                                                                                                                                                                                                                                                                                                                                                                |
|     | Porque suena y se parece a un grillo.                                                                                                                                                                                                                                                                                                                                                                                                                                                                                                                                                                                                                                                                                                                                                                                                                                                                                                                                                                                                                                                                                                                        |
| 326 | <b>Rana Despertar del Río</b> <i>Matthaeusrevel</i>   Juan Mateo Revelo Mosquera, 18, Ecuador                                                                                                                                                                                                                                                                                                                                                                                                                                                                                                                                                                                                                                                                                                                                                                                                                                                                                                                                                                                                                                                                |
|     | Elegí "Rana Despertar del Río". "Rana despertar" porque al escuchar el ruido que emite la rana lo primero que se me vino a la mente fue el sonido del despertador de mi madre y por eso le puse despertar; además cada mañana es bueno escuchar un despertador y saber que un nuevo día ha comenzado y esto nos abre una esperanza nueva, la misma que depende del ánimo y la actitud que pongamos en cada despertar.<br>Adicional a esto, despertar del río lo relaciono con el agua que fluye y que cada minuto es nueva, pues circula y no es estática, como la esperanza, que siempre tiene que renovarse. La otra parte del nombre elegido, "del Río", la puse debido al hábitat donde se encuentra esta rana, pues en la explicación se indica claramente que vive cerca de ríos. Para el epíteto específico escogí Matthaeusrevel, debido a que mi segundo es Mateo y mi primer apellido es Revelo; además, si estos nombres resultan ganadores sería un honor para mí que en los estudios que se realicen se mencione a una rana ecuatoriana con mi nombre.                                                                                          |

 = Winner  
 = Runner-Up  
 = Contributor  
 = Finalist  
 = Semi-Finalist  
 = Special Recognition  
 = Science & Research Award  
 = Creativity Award  
 = Inspiring Conservation Award  
 = Junior Scientist Award (12 & under)



## Species Naming Competition Full List of Entries

|     |                                                                                                                                                                                                                                                                                                                                                                                                                                                                                                                                                                                                                                                                                                                                                                                                                                                                                                                                                                                                                             |
|-----|-----------------------------------------------------------------------------------------------------------------------------------------------------------------------------------------------------------------------------------------------------------------------------------------------------------------------------------------------------------------------------------------------------------------------------------------------------------------------------------------------------------------------------------------------------------------------------------------------------------------------------------------------------------------------------------------------------------------------------------------------------------------------------------------------------------------------------------------------------------------------------------------------------------------------------------------------------------------------------------------------------------------------------|
| 327 | <b>The Choco Torrent Frog</b> <i>Hyloscirtus Torrentem</i>   Judah McGrath, 6, USA ●●●                                                                                                                                                                                                                                                                                                                                                                                                                                                                                                                                                                                                                                                                                                                                                                                                                                                                                                                                      |
|     | I think the judges should consider the name that I created because it is amazing and because I think frogs are cool. My Daddy makes me hot cocoa every weekend and this new frog is from Choco cloud forest and those two words are kind of the same. So I wanted Choco to be in the name for the frog.                                                                                                                                                                                                                                                                                                                                                                                                                                                                                                                                                                                                                                                                                                                     |
| 328 | <b>Freckled Torrent Frog</b> <i>Hylcirtus puerilis</i>   Jules Peiperl, 23, USA ●●●                                                                                                                                                                                                                                                                                                                                                                                                                                                                                                                                                                                                                                                                                                                                                                                                                                                                                                                                         |
|     | The small pigmented spots on the skin of the male <i>Hyloscirtus</i> sp. CC. remind me of freckles. I like imagining this frog as having freckles because they remind me of the young people all over the world who are becoming invested in environmental study and preservation. I think that noting this new species of frog for its youthful appearance ( <i>puerilis</i> , in Latin, means “youthful” or “childlike”) can remind us that involving young people, especially kids, in the study and protection of the environment is of paramount importance. Just because someone is small or has a freckled and youthful appearance, doesn’t mean that they don’t serve an important role in their community, just as <i>Hyloscirtus</i> sp. CC. serves an important role in the rainforest of Carchi province.                                                                                                                                                                                                       |
| 329 | <b>chapuzón- mano de tierra</b> <i>intinge - manus terrae</i>   Julia Trujillo, 13, Ecuador ●●                                                                                                                                                                                                                                                                                                                                                                                                                                                                                                                                                                                                                                                                                                                                                                                                                                                                                                                              |
|     | Yo escogí este nombre debido a que este animal me pareció muy curioso desde el principio de su aparición ya que las ranas en si tienen en su piel los colores naturales de la tierra además de esto también al ser de forma circular los dedos de sus manos me pareció que con estas también podían impulsarse desde un roca que en este caso sería la tierra hacia el agua dándose un chapuzón me gusto este nombre porque me parecía gracioso y además por que quisiera que todos nos identificáramos con ella al dar un salto desde una cascada como lo hacen varias personas que habitan en la zona y saltan desde las quebradas hacia el agua bien si nos ponemos a pensar esta rana hace lo mismo al ser tan chiquitita es como si estuviera saltando desde un acantilado otra razón por la que escogí este nombre es porque muchas veces los animales necesitan en si la tierra para sobrevivir en este caso ella lo necesita para darse un gran chapuzón! Atrévete a dar saltos grandes por lo que te apasiona.4 ok |
| 330 | <b>gotita cristalina</b> <i>crystallinus domi</i>   Julia Trujillo, 13, Ecuador ●                                                                                                                                                                                                                                                                                                                                                                                                                                                                                                                                                                                                                                                                                                                                                                                                                                                                                                                                           |
|     | La especie demuestra que puede vivir gracias a su estilo de camuflaje y todo gracias a su piel que como el agua cambia de color dependiendo los factores y no solo eso que al parecer puede cambiar el color de sus ojos eso es algo simplemente impresionante ya que le permite no ser cazado por depredadores pero también puede ser una impresionante estrategia para que pueda cazar insectos y larvas con mayor facilidad sus huevos también parecen pequeñas gotas de agua lo que permitirá que su especie pueda tal vez seguir sobreviviendo y al dejar descendencia años mas tarde esperar poder verla de nuevo como siempre posada en una hoja o sobre las superficies de las piedras del rio a finos roses del agua viviendo tranquilamente muchos no podrán verla por lo diminuta que es y otros por que tiene un estilo de camuflaje que te sorprende y que le da esa apariencia de gotita de cristalina.                                                                                                       |
| 331 | <b>Carchi brown speckled frog</b>   julia roche, 17, USA                                                                                                                                                                                                                                                                                                                                                                                                                                                                                                                                                                                                                                                                                                                                                                                                                                                                                                                                                                    |
|     | The frog is found in Carchi province, Ecuador which provides people an idea of where the frog was first found and is located. The frog also has brown speckles all over its skin which gives people an idea of what the frog looks like.                                                                                                                                                                                                                                                                                                                                                                                                                                                                                                                                                                                                                                                                                                                                                                                    |
| 332 | <b>semi choco spotted mountain Leaf frog</b>   Julianna Cesare, 18, Canada                                                                                                                                                                                                                                                                                                                                                                                                                                                                                                                                                                                                                                                                                                                                                                                                                                                                                                                                                  |
|     | The frog lives in the choco bioregion at a high elevation, therefore I included mountain and choco to not only represent the colour of spots on the male and female frogs but also the region. The frog lays its eggs on leafs that then allow the tadpoles to slide off into the river which I think is an important detail to this new species. Unlike the spotted glass frog, this frog only has few spots on its females, almost like a semi ripe banana. These factors combined give a lot of unique characteristics which would make a descriptive and educational name                                                                                                                                                                                                                                                                                                                                                                                                                                               |
| 333 | <b>bonnie</b> <i>Frentai Boniai</i>   Julissa Hernandez, 14, USA                                                                                                                                                                                                                                                                                                                                                                                                                                                                                                                                                                                                                                                                                                                                                                                                                                                                                                                                                            |
|     | My first dogs name was bonbon, but he passed, so in honor of him I would name it Frentai Boniai as its scientific name. As its common name i would name it Bonnie since that was my dogs nickname.                                                                                                                                                                                                                                                                                                                                                                                                                                                                                                                                                                                                                                                                                                                                                                                                                          |
| 334 | <b>the tulcan brown spotted frog.</b> <i>tulirownspot</i>   june kahumbu, Unspecified, kenyan                                                                                                                                                                                                                                                                                                                                                                                                                                                                                                                                                                                                                                                                                                                                                                                                                                                                                                                               |
|     | i chose it because its from tulcan country and its brown spotted and u put the words together                                                                                                                                                                                                                                                                                                                                                                                                                                                                                                                                                                                                                                                                                                                                                                                                                                                                                                                               |
| 335 | <b>Dracula</b>   Justin Sather, 9, USA ●                                                                                                                                                                                                                                                                                                                                                                                                                                                                                                                                                                                                                                                                                                                                                                                                                                                                                                                                                                                    |
|     | The frog was found near the Dracula reserve.                                                                                                                                                                                                                                                                                                                                                                                                                                                                                                                                                                                                                                                                                                                                                                                                                                                                                                                                                                                |
| 336 | <b>The smiling speckled frog</b> <i>beatus ranae</i>   Kaelin Harris, 13, North America                                                                                                                                                                                                                                                                                                                                                                                                                                                                                                                                                                                                                                                                                                                                                                                                                                                                                                                                     |
|     | The frog looks as if he were smiling and that when people hear things live “smileing” “smile’s” and “happy” they most of the time feel more like they need to protect something because it is seen as more fragile wilch may help influence people to protect it. It also has specials on its back / little dots wilch will help identify it when seen.                                                                                                                                                                                                                                                                                                                                                                                                                                                                                                                                                                                                                                                                     |

 = Winner  
 = Runner-Up  
 = Contributor  
 = Finalist  
 = Semi-Finalist  
 = Special Recognition  
 = Science & Research Award  
 = Creativity Award  
 = Inspiring Conservation Award  
 = Junior Scientist Award (12 & under)

## Species Naming Competition Full List of Entries

|     |                                                                                                                                                                                                                                                                                                                                                                                                                                                                                                                                                                                                                                                  |
|-----|--------------------------------------------------------------------------------------------------------------------------------------------------------------------------------------------------------------------------------------------------------------------------------------------------------------------------------------------------------------------------------------------------------------------------------------------------------------------------------------------------------------------------------------------------------------------------------------------------------------------------------------------------|
| 337 | <b>Dragon Frog</b>   Kai Templeton, 7, USA ●                                                                                                                                                                                                                                                                                                                                                                                                                                                                                                                                                                                                     |
|     | I chose this name because the frog has the eyes of a dragon.                                                                                                                                                                                                                                                                                                                                                                                                                                                                                                                                                                                     |
| 338 | <b>Kermet</b> <i>Kermet viridis anura</i>   Kailan Purcell, 17, Irish                                                                                                                                                                                                                                                                                                                                                                                                                                                                                                                                                                            |
|     | Kermet-vidrus- anrua , I based it off the muppets Kermet the frog who's green. So I looked up the scientific words for green and frog and I just put it all together                                                                                                                                                                                                                                                                                                                                                                                                                                                                             |
| 339 | <b>chameleon</b>   kailenne currie, 11, canada ●                                                                                                                                                                                                                                                                                                                                                                                                                                                                                                                                                                                                 |
|     | because it changes colours like a chameleon                                                                                                                                                                                                                                                                                                                                                                                                                                                                                                                                                                                                      |
| 340 | <b>Cinnamon sprinkle rain frog</b> <i>Pristimantis andeshah</i>   Kalem wooldridge, 6, USA ●                                                                                                                                                                                                                                                                                                                                                                                                                                                                                                                                                     |
|     | Both kinds are spotted.(female and male)                                                                                                                                                                                                                                                                                                                                                                                                                                                                                                                                                                                                         |
| 341 | <b>Michoco Jelly Torrent Frog</b> <i>Hyloscirtus Michoco</i>   Kalinda Nismara, 10, Indonesia ●●●●                                                                                                                                                                                                                                                                                                                                                                                                                                                                                                                                               |
|     | Michoco Jelly Torrent Frog means My Choco Jelly Torrent Frog. This Frog lives in the Choco Cloud Rainforest and this name was chosen to honour the Choco Rainforest. The Frog has a transparent green skin, like a Jelly! Mi is a spanish word for my and this means that everyone can call the Frog theirs, because this Frog is one of the unique species in our one and only planet Earth, protecting the Earth and the living things is part of our responsibility.                                                                                                                                                                          |
| 342 | <b>Rana camufladora ecuatoriana</b> <i>Hyloscirtus chocoannis</i>   Karol Salazar, 18, Colombiana                                                                                                                                                                                                                                                                                                                                                                                                                                                                                                                                                |
|     | Los nombres comunes y científicos escogidos hacen referencia a características propias de la rana, cómo lo son el cambio de color de su piel como mecanismo de defensa y el área en la que fué encontrada esta rana.                                                                                                                                                                                                                                                                                                                                                                                                                             |
| 343 | <b>Slime Frogs</b> <i>limus</i>   Kashaf Riyadh, 11, Canada ●                                                                                                                                                                                                                                                                                                                                                                                                                                                                                                                                                                                    |
|     | It looks like a blob of slime when I first saw the pictures It looked more like slime then a frog                                                                                                                                                                                                                                                                                                                                                                                                                                                                                                                                                |
| 344 | <b>Slime Frog</b> <i>Hyloscirtus Limus</i>   Kashaf Riyadh, 11, Canada ●                                                                                                                                                                                                                                                                                                                                                                                                                                                                                                                                                                         |
|     | When I first saw it I thought it was slime not a frog it's green like some slime and the males are brown and brown is another colour that people make slime of and the texture looks like slime and it looks like a blob.                                                                                                                                                                                                                                                                                                                                                                                                                        |
| 345 | <b>Ripeus glumori</b> <i>Ripeus glumori</i>   Kasiah Telligman, 9, USA ●                                                                                                                                                                                                                                                                                                                                                                                                                                                                                                                                                                         |
|     | Because it sounds like a magic spell. Frogs are magical.                                                                                                                                                                                                                                                                                                                                                                                                                                                                                                                                                                                         |
| 346 | <b>Round Toed Sparkle Frog</b>   Kate Lachlan, 18, UK                                                                                                                                                                                                                                                                                                                                                                                                                                                                                                                                                                                            |
|     | he has round toes and looks like a wonderful sparkly friend                                                                                                                                                                                                                                                                                                                                                                                                                                                                                                                                                                                      |
| 347 | <b>The ugly diamond torrent frog</b> <i>turpiculusiaspis</i>   Katherine Briant, 14, United Kingdom ●●                                                                                                                                                                                                                                                                                                                                                                                                                                                                                                                                           |
|     | I chose this name because it translates from Latin as ugly diamond (or at least I tried my best on Google translate!). While I personally think this frog is beautiful, it's often the slimier, smaller and less memorable animals that lose out in conservation. People want to help majestic, iconic tigers or fluffy, funny pandas - not a little frog nobody's heard of. The diamond part of the name shows that despite all this, this animal is still such an important part of its ecosystem and is so valuable to nature. Our world is so amazingly complex and we shouldn't pick and choose which species we save based on appearances. |
| 348 | <b>Jade Swallow speckled frog</b>   Kathryn hatchett, 16, England                                                                                                                                                                                                                                                                                                                                                                                                                                                                                                                                                                                |
|     | I chose Jade to represent the vibrant and beautiful colour of the frog and also the rarity as gemstones are rare and individual just like these frogs. Inspired by the nearby mountains I picked swallow because it reflects the delicate nature of the frog's body and they look elegant so the name swallow would show this. The speckled part represents the intricate dots and patterns on the frog's body.                                                                                                                                                                                                                                  |
| 349 | <b>Ecuadorian freckled frog</b> <i>Hyloscirtus lentiginos</i>   Katie Waddington, 24, British-French                                                                                                                                                                                                                                                                                                                                                                                                                                                                                                                                             |
|     | I chose the name Ecuadorian freckled frog as I thought it embodied this particular frog. I included Ecuadorian as with the rapid loss of biodiversity throughout the world, it is important to acknowledge where these fascinating animals originated from. I chose the word "freckled" as that is what stood out to me visually. Both male and female have these small dots either completely or partially covering their bodies. This reminded me of freckles you would find on people, a sign of rare beauty and individuality in my eyes.                                                                                                    |
| 350 | <b>froggy the Frog go</b> <i>froggy quod froggo</i>   Katrina Jacobs, Unspecified, Canada                                                                                                                                                                                                                                                                                                                                                                                                                                                                                                                                                        |
|     | because I think that's the kind of cute name for a pretty adorable frog and I kind of just really like that name it's a cute name for a cute frog                                                                                                                                                                                                                                                                                                                                                                                                                                                                                                |

 = Winner  
 = Runner-Up  
 = Contributor  
 = Finalist  
 = Semi-Finalist  
 = Special Recognition  
 = Science & Research Award  
 = Creativity Award  
 = Inspiring Conservation Award  
 = Junior Scientist Award (12 & under)

## Species Naming Competition Full List of Entries

|     |                                                                                                                                                                                                                                                                                                                                                                                                                            |
|-----|----------------------------------------------------------------------------------------------------------------------------------------------------------------------------------------------------------------------------------------------------------------------------------------------------------------------------------------------------------------------------------------------------------------------------|
| 351 | <b>Tulcán Chameleon Frog</b> <i>Hyloscirtus Tulcaniensis</i>   Kaya Wells, 20, USA                                                                                                                                                                                                                                                                                                                                         |
|     | The common name is for characteristics such as its location and the fact that it changes color. The scientific name is the genus and the area it lives in.                                                                                                                                                                                                                                                                 |
| 352 | <b>Chirping Frodeen</b> ( <i>frodeen means spotted frog</i> )   Kaydee Koldos, 8, USA ●                                                                                                                                                                                                                                                                                                                                    |
|     | Because It Chirps And Frodeen (or spotted frog) it's a spotted frog!                                                                                                                                                                                                                                                                                                                                                       |
| 353 | <b>Changing water</b> <i>Mutantes aquam rana</i>   Kayla Nudell, 17, USA                                                                                                                                                                                                                                                                                                                                                   |
|     | The frogs color changes a unique feature. I think that discovering the frog can be an indicator of positive changes to the world moving forward from such a horrible year. I think the frog resembles change. Since it lives near moving waters it was only fitting to add that into the name.                                                                                                                             |
| 354 | <b>Palmers Tree Frog</b> <i>Hyloscirtus palmyrus</i>   Kedar nan, 13, India                                                                                                                                                                                                                                                                                                                                                |
|     | I attended a workshop on frogs and did further research based on social media posts.                                                                                                                                                                                                                                                                                                                                       |
| 355 | <b>Jeff</b> <i>meum nomen est</i>   Kendall Totten, 21, USA                                                                                                                                                                                                                                                                                                                                                                |
|     | As a popular movie 22 Jump Street, the phrase "My name is Jeff," has become a popular meme. By naming this frog Jeff it would gain vast attention throughout multiple social media platforms. Ultimately bringing attention to the scientific community and possibly future passionate people interested in animals.                                                                                                       |
| 356 | <b>Rana Anura</b>   Kennedi English, 16, USA                                                                                                                                                                                                                                                                                                                                                                               |
|     | Because I really like the name and how it is pronounced.                                                                                                                                                                                                                                                                                                                                                                   |
| 357 | <b>Red Spotted Glazed Frog</b> <i>Glazedie Reddis Spotticus</i>   Kennedy Brooks, 14, USA                                                                                                                                                                                                                                                                                                                                  |
|     | I chose this name because the frog has a glass-like texture but I wanted another name for glass, so I chose glazed. The frog is also red-spotted.                                                                                                                                                                                                                                                                          |
| 358 | <b>The horizontal eyed frog</b> <i>Kermit the Frog</i>   kermit the frog, 11, USA ●                                                                                                                                                                                                                                                                                                                                        |
|     | Because it's Kermit long lost brother                                                                                                                                                                                                                                                                                                                                                                                      |
| 359 | <b>The sticky frog</b> <i>Mountain ranae</i>   Kevin Scully, 11, Ontario ●                                                                                                                                                                                                                                                                                                                                                 |
|     | I chose this name because the habitat of this frog is in the mountains .                                                                                                                                                                                                                                                                                                                                                   |
| 360 | <b>Choco chirping torrent frog</b> <i>Chocoensis</i>   Kevin Hutcheson, 21, USA ●                                                                                                                                                                                                                                                                                                                                          |
|     | It references the location where this frog was discovered.                                                                                                                                                                                                                                                                                                                                                                 |
| 361 | <b>slime toed tree frog</b>   Keylan Henry, 5, USA ●                                                                                                                                                                                                                                                                                                                                                                       |
|     | It just sounded like the frog looks.                                                                                                                                                                                                                                                                                                                                                                                       |
| 362 | <b>Cerro Frog</b>   Khushla Dooboree, 10, Canada ● ●                                                                                                                                                                                                                                                                                                                                                                       |
|     | I could have named this frog anything, like the name of Someone I love or something about it, like the spotted frog. But the area in which this frog lives In is so small, and I wanted to name it something that is unique or special about this area! So I decided to do the Cerro Frog, after the beautiful mountains Cerro Goldrinas and Cerro Negro, which are found in the area which is this frogs only known home! |
| 363 | <b>Hope Frog</b> <i>Hyloscirtus Spes</i>   Kyle Downie, 20, United Kingdom ● ●                                                                                                                                                                                                                                                                                                                                             |
|     | Generally I had been feeling very little hope that we (environmental activists) were going to achieve anything. The news of the discovery of this frog sparked a new hope though. At a time when so many species are facing extinction, we are still discovering so much more about this wonderful planet. This discovery gives more reason to fight for a future for all of Earth's living creatures.                     |
| 364 | <b>The Freckled Frog</b> <i>dat lentiginosus ranae</i>   kyra fraser, 11, Canada ●                                                                                                                                                                                                                                                                                                                                         |
|     | I choosed this name because the frog has a lot of dots                                                                                                                                                                                                                                                                                                                                                                     |
| 365 | <b>Brown speckled torrent frog</b>   Lana Jackson, 13, UK ●                                                                                                                                                                                                                                                                                                                                                                |
|     | I chose this name because i had noticed it had brown speckled on its skin, and as I read through the file and information, I heard it was a torrent frog, but in the tree frog family. So I named it the brown speckled torrent frog.                                                                                                                                                                                      |

 = Winner  
 = Runner-Up  
 = Contributor  
 = Finalist  
 = Semi-Finalist  
 = Special Recognition  
 = Science & Research Award  
 = Creativity Award  
 = Inspiring Conservation Award  
 = Junior Scientist Award (12 & under)

## Species Naming Competition Full List of Entries

|     |                                                                                                                                                                                                                                                                                                                                                                                                                                                                                                                                                                                                                                                                                                                                                                                                                                                                                                                                                                                                                                                                                                                                              |
|-----|----------------------------------------------------------------------------------------------------------------------------------------------------------------------------------------------------------------------------------------------------------------------------------------------------------------------------------------------------------------------------------------------------------------------------------------------------------------------------------------------------------------------------------------------------------------------------------------------------------------------------------------------------------------------------------------------------------------------------------------------------------------------------------------------------------------------------------------------------------------------------------------------------------------------------------------------------------------------------------------------------------------------------------------------------------------------------------------------------------------------------------------------|
| 366 | <b>water frog</b> <i>torrent frog</i>   Landon Hubbard, 11, Canada ● ●                                                                                                                                                                                                                                                                                                                                                                                                                                                                                                                                                                                                                                                                                                                                                                                                                                                                                                                                                                                                                                                                       |
|     | I chose this name because frogs are always wet and it's always climbing trees.                                                                                                                                                                                                                                                                                                                                                                                                                                                                                                                                                                                                                                                                                                                                                                                                                                                                                                                                                                                                                                                               |
| 367 | <b>The slim spotted male frog</b> <i>Hylocitus pandemus</i>   Lapidoth Iyiola, 14, USA                                                                                                                                                                                                                                                                                                                                                                                                                                                                                                                                                                                                                                                                                                                                                                                                                                                                                                                                                                                                                                                       |
|     | I chose this name because I discovered this species during a pandemic. I named it as a reminder of this moment in history.                                                                                                                                                                                                                                                                                                                                                                                                                                                                                                                                                                                                                                                                                                                                                                                                                                                                                                                                                                                                                   |
| 368 | <b>the walter frog</b> <i>Laura</i>   Laura Turnbull, 15, England                                                                                                                                                                                                                                                                                                                                                                                                                                                                                                                                                                                                                                                                                                                                                                                                                                                                                                                                                                                                                                                                            |
|     | there is a walter dog there should be a walter frog i also think it is a pretty rad name                                                                                                                                                                                                                                                                                                                                                                                                                                                                                                                                                                                                                                                                                                                                                                                                                                                                                                                                                                                                                                                     |
| 369 | <b>Camofrog</b> <i>Hyloscirtus caveatis</i>   Lautaro Otero, 15, Argentina ●                                                                                                                                                                                                                                                                                                                                                                                                                                                                                                                                                                                                                                                                                                                                                                                                                                                                                                                                                                                                                                                                 |
|     | The names I chose are mainly due to the frog's ability to change color and camouflage with the environment. First I chose the scientific name, which I originally wanted to be camouflage in Latin. However, when camouflage is translated into Latin, the result was two words: caveatis Porcina. Of course, the species epithet can't be more than one word, so I looked up the word caveatis, to see if it would work on its own. And it turns out that caveatis is a conjugation of the word caveō, which means to be aware, avoid, and take care. In my opinion, that is a perfect representation of this animal, as its habitat is one of the most biodiverse and threatened ecosystems in the world, so in order to remain alive, the tiny frogs have to be aware of their surroundings at all times to avoid predators or threats (which they can accomplish by camouflaging) in order to take care of themselves. Now moving on to the common name, I chose camofrog because I believe it is a very catchy, simple name (kind of like bullfrog) that tells you exactly what this animal is capable of doing, which is camouflaging. |
| 370 | <b>Dreaming Frog</b> <i>Somnium</i>   Layla Love, 11, American ●                                                                                                                                                                                                                                                                                                                                                                                                                                                                                                                                                                                                                                                                                                                                                                                                                                                                                                                                                                                                                                                                             |
|     | I like having good dreams.                                                                                                                                                                                                                                                                                                                                                                                                                                                                                                                                                                                                                                                                                                                                                                                                                                                                                                                                                                                                                                                                                                                   |
| 371 | <b>leaf frog</b> <i>leaf frog</i>   leaf frog mom, 12, og ●                                                                                                                                                                                                                                                                                                                                                                                                                                                                                                                                                                                                                                                                                                                                                                                                                                                                                                                                                                                                                                                                                  |
|     | it blends in with                                                                                                                                                                                                                                                                                                                                                                                                                                                                                                                                                                                                                                                                                                                                                                                                                                                                                                                                                                                                                                                                                                                            |
| 372 | <b>Flouge</b>   Leah (Bancroft ES) Kiprono, 10, USA ●                                                                                                                                                                                                                                                                                                                                                                                                                                                                                                                                                                                                                                                                                                                                                                                                                                                                                                                                                                                                                                                                                        |
|     | I chose that name from "camouflage".                                                                                                                                                                                                                                                                                                                                                                                                                                                                                                                                                                                                                                                                                                                                                                                                                                                                                                                                                                                                                                                                                                         |
| 373 | <b>Lemon Frog</b> <i>Hylocirtus Citrea</i>   Lemma Lee, 16, England                                                                                                                                                                                                                                                                                                                                                                                                                                                                                                                                                                                                                                                                                                                                                                                                                                                                                                                                                                                                                                                                          |
|     | Hylocirtus Cirtus is very similar to citrus Lemons are citrus Citrea means lemon in latin I think we deserve a lemon frog                                                                                                                                                                                                                                                                                                                                                                                                                                                                                                                                                                                                                                                                                                                                                                                                                                                                                                                                                                                                                    |
| 374 | <b>Leo Frog</b>   Leo Gistau, 6, USA ●                                                                                                                                                                                                                                                                                                                                                                                                                                                                                                                                                                                                                                                                                                                                                                                                                                                                                                                                                                                                                                                                                                       |
|     | Because it's my name                                                                                                                                                                                                                                                                                                                                                                                                                                                                                                                                                                                                                                                                                                                                                                                                                                                                                                                                                                                                                                                                                                                         |
| 375 | <b>Gayus frogus</b> <i>Gayus frogus</i>   Leo Ashburner, 13, New Zealand                                                                                                                                                                                                                                                                                                                                                                                                                                                                                                                                                                                                                                                                                                                                                                                                                                                                                                                                                                                                                                                                     |
|     | Because I feel gay and LGBTQ people need to be understood more and having a frog named after them would help people understand                                                                                                                                                                                                                                                                                                                                                                                                                                                                                                                                                                                                                                                                                                                                                                                                                                                                                                                                                                                                               |
| 376 | <b>Boca Desabrida</b> <i>Hyloscirtus sibilus thor</i>   Leonel Matias Cabezas Ochoa, 9, Ecuador ●                                                                                                                                                                                                                                                                                                                                                                                                                                                                                                                                                                                                                                                                                                                                                                                                                                                                                                                                                                                                                                            |
|     | La razón de su nombre común es porque puede ser una característica que aún no se ha descubierto de esta grandiosa especie. Su nombre científico, Hyloscirtus es su género, sibilus es porque el sonido que produce esta rana es como el de un silbido de otros animales, como el pájaro; y Thor, gracias a que el silbido de esta rana es fuerte al igual que Thor, además este es uno de mis superhéroes favoritos.                                                                                                                                                                                                                                                                                                                                                                                                                                                                                                                                                                                                                                                                                                                         |
| 377 | <b>Emerald Tree Frog</b> <i>Hylocirtus Colorimmutatus</i>   Lewis Catlin, 15, England                                                                                                                                                                                                                                                                                                                                                                                                                                                                                                                                                                                                                                                                                                                                                                                                                                                                                                                                                                                                                                                        |
|     | I picked the name as directly in Latin it comes to "Colour changing" which is fitting to the species colours and behavior.                                                                                                                                                                                                                                                                                                                                                                                                                                                                                                                                                                                                                                                                                                                                                                                                                                                                                                                                                                                                                   |
| 378 | <b>Round pad frog</b> <i>Discendo Discimus</i>   Lewis Burgess, 17, Wales                                                                                                                                                                                                                                                                                                                                                                                                                                                                                                                                                                                                                                                                                                                                                                                                                                                                                                                                                                                                                                                                    |
|     | Discendo Discimus Translates to "By teaching we learn" I chose this because it brings a powerful message to everyone whose passionate about nature and conservation. We as conservationists need to show people how vital it is to protect what we are so lucky to have, and this name shows how is teaching others can also benefit us.                                                                                                                                                                                                                                                                                                                                                                                                                                                                                                                                                                                                                                                                                                                                                                                                     |
| 379 | <b>The Mossy Glass Frog</b> <i>Hyloscirtus Blancas</i>   Lex Schlesener, 12, America ●                                                                                                                                                                                                                                                                                                                                                                                                                                                                                                                                                                                                                                                                                                                                                                                                                                                                                                                                                                                                                                                       |
|     | Because it looks like mossy glass.                                                                                                                                                                                                                                                                                                                                                                                                                                                                                                                                                                                                                                                                                                                                                                                                                                                                                                                                                                                                                                                                                                           |

 = Winner  
 = Runner-Up  
 = Contributor  
 = Finalist  
 = Semi-Finalist  
 = Special Recognition  
 = Science & Research Award  
 = Creativity Award  
 = Inspiring Conservation Award  
 = Junior Scientist Award (12 & under)

## Species Naming Competition Full List of Entries

|     |                                                                                                                                                                                                                                                                                                                                                                                                                                                                                                                                                               |
|-----|---------------------------------------------------------------------------------------------------------------------------------------------------------------------------------------------------------------------------------------------------------------------------------------------------------------------------------------------------------------------------------------------------------------------------------------------------------------------------------------------------------------------------------------------------------------|
| 380 | <b>Brown Spotted Beauty</b> <i>brunneis maculis pulchritudo</i>   Lexia Forester, Unspecified, USA                                                                                                                                                                                                                                                                                                                                                                                                                                                            |
|     | This little frog displays a variety of tiny brown or amber looking spots all over its body, whether it is leaning more towards the brown or the green end of the scale, it still displays some of those little spots.                                                                                                                                                                                                                                                                                                                                         |
| 381 | <b>Tropical Zebra</b> <i>Ferus Tropicae</i>   Lia Levin, 11, USA                                                                                                                                                                                                                                                                                                                                                                                                                                                                                              |
|     | I chose this name because the frog is lives in a tropical area, and it has colorful, and interesting colors and spots like a zebra.                                                                                                                                                                                                                                                                                                                                                                                                                           |
| 382 | <b>Smirking torrent frog</b> <i>Hyloscirtus smirkii</i>   Liam Baisley, 21, South Africa ●                                                                                                                                                                                                                                                                                                                                                                                                                                                                    |
|     | The facial structure of this frog makes it look like it has a silly or cunning smirk on its face. Just like this :). It looks like it has thought of the perfect way to plop into the stream later that afternoon! I think frogs are silly looking animals (in a good way!) and this silly name suits this frog so well!                                                                                                                                                                                                                                      |
| 383 | <b>Liam Gregory</b> <i>Liamos Gregoryei</i>   Liam... duh Gregory, 19, canada                                                                                                                                                                                                                                                                                                                                                                                                                                                                                 |
|     | because                                                                                                                                                                                                                                                                                                                                                                                                                                                                                                                                                       |
| 384 | <b>brown eyed glass Frog</b> <i>Gaillardia speculum ranae</i>   Lianne Elkadri, 11, Canada ●                                                                                                                                                                                                                                                                                                                                                                                                                                                                  |
|     | The reason I submitted this name is because it is brown eyed and it is a glass frog.                                                                                                                                                                                                                                                                                                                                                                                                                                                                          |
| 385 | <b>chamel Frog</b> <i>Hyloscirtus caveatis Porcina</i>   Lilian Garcia, 15, USA                                                                                                                                                                                                                                                                                                                                                                                                                                                                               |
|     | Because it somewhat resembles a chameleon and it's abilities are similar to that of one.                                                                                                                                                                                                                                                                                                                                                                                                                                                                      |
| 386 | <b>Hello Frog</b> <i>Hyloscirtus altrovorsum</i>   Lillian Armenteros Lama, 16, Dominican Republic                                                                                                                                                                                                                                                                                                                                                                                                                                                            |
|     | Scientific Name: The frog is found exclusively in Carchi Province, Ecuador. Carchi, in the local Caribbean language, means "on the other side." In Latin, this phrase roughly translates to "altrovorsum," so this is what I chose for the species. For the genus, I left it "Hyloscirtus" as that is the branch under which it falls upon so far. Common Name: The artist Adele's most popular song is called "Hello," and the most famous lyric is "Hello from the other side..." I thought it would be a nice, colloquial, and easy nickname for the frog. |
| 387 | <b>The Ecuadorian Okra Tree Frog</b> <i>Hyloscirtus Okra Arbor Rana</i>   Lily Thompson, 10, Canada ●                                                                                                                                                                                                                                                                                                                                                                                                                                                         |
|     | I choose the name because the frog looks like an okra vegetable and grows in Ecuador. The frog was found in Ecuador so I wanted to include it. I included tree frog in the frogs name because I thought it was important to include its specie type in its name.                                                                                                                                                                                                                                                                                              |
| 388 | <b>Little Russell</b> <i>pandemus superstes</i>   Lily Scholes, 20, British                                                                                                                                                                                                                                                                                                                                                                                                                                                                                   |
|     | I am making this entry in the name of my fellow students on Level 3 Countryside Management at Brooksby Melton College, Leicestershire UK. Myself, Lily and Dylan find many common frogs on our lunch hour and as a bit of fun we call them little Russell's as usually you spot them by hearing a little rustle in the undergrowth or see a leaf move slightly. The Latin name is pandemic survivor, which I think is apt Thanks Greg                                                                                                                         |
| 389 | <b>brottney</b>   lily porter, Unspecified, USA                                                                                                                                                                                                                                                                                                                                                                                                                                                                                                               |
|     | i chose this name because it is named off of my friend                                                                                                                                                                                                                                                                                                                                                                                                                                                                                                        |
| 390 | <b>Fat-Toe Torrent Frog</b> <i>plenapolli</i>   Limnanthes Serafini, 18, USA ●                                                                                                                                                                                                                                                                                                                                                                                                                                                                                |
|     | One of the most unique features of this particular frog is how round its toes are - so I chose a name that helps scientists easily recall its appearance while still being short and audibly snappy. The scientific name comes from plenus (fat) and polli (tips), which has some really nice alliteration and just rolls off the tongue.                                                                                                                                                                                                                     |
| 391 | <b>Emerald Raindrop Frog</b> <i>Thesaurum</i>   Liv Grant, 24, UK and USA ● ● ●                                                                                                                                                                                                                                                                                                                                                                                                                                                                               |
|     | When I imagine the tadpoles falling from the leaves into a stream I picture glittering jewels of life falling from the sky - Emerald Raindrops! I think the scientific name should reflect just how precious this newly discovered species is, and so I would like to suggest "thesaurum" as the species name. This has the dual meaning of the noun "treasure" which is what this frog is, and the verb "to treasure", which is what we must do to protect this species and it's habitat.                                                                    |
| 392 | <b>Froggy mcfrogson</b> <i>Frogemus mcfrogsonis</i>   Lochlan Ambrose, 13, English                                                                                                                                                                                                                                                                                                                                                                                                                                                                            |
|     | Because I have the mental age of step year old                                                                                                                                                                                                                                                                                                                                                                                                                                                                                                                |
| 393 | <b>Finger Toed Franklin</b> <i>Fingerous Frankenous</i>   Logan Meck, 17, USA                                                                                                                                                                                                                                                                                                                                                                                                                                                                                 |
|     | My girlfriend thought Franklin was a cute name                                                                                                                                                                                                                                                                                                                                                                                                                                                                                                                |

 = Winner  
 = Runner-Up  
 = Contributor  
 = Finalist  
 = Semi-Finalist  
 = Special Recognition  
 = Science & Research Award  
 = Creativity Award  
 = Inspiring Conservation Award  
 = Junior Scientist Award (12 & under)



## Species Naming Competition Full List of Entries

|     |                                                                                                                                                                                                                                                                                                                                                                                                                                                                                                                                                                                                                                                                                                                                                                                                                                                                                                                                                                                                                                                                                                                                                                                             |
|-----|---------------------------------------------------------------------------------------------------------------------------------------------------------------------------------------------------------------------------------------------------------------------------------------------------------------------------------------------------------------------------------------------------------------------------------------------------------------------------------------------------------------------------------------------------------------------------------------------------------------------------------------------------------------------------------------------------------------------------------------------------------------------------------------------------------------------------------------------------------------------------------------------------------------------------------------------------------------------------------------------------------------------------------------------------------------------------------------------------------------------------------------------------------------------------------------------|
| 394 | <b>Hoppity-Hopscotch</b>   Lola Walton, 16, United Kingdom                                                                                                                                                                                                                                                                                                                                                                                                                                                                                                                                                                                                                                                                                                                                                                                                                                                                                                                                                                                                                                                                                                                                  |
|     | Frogs jump. It's a cute name for a cute frog.                                                                                                                                                                                                                                                                                                                                                                                                                                                                                                                                                                                                                                                                                                                                                                                                                                                                                                                                                                                                                                                                                                                                               |
| 395 | <b>Mitten torrent frog</b> <i>Hyloscirtus covidia</i>   Lucie Yang, 15, Canada                                                                                                                                                                                                                                                                                                                                                                                                                                                                                                                                                                                                                                                                                                                                                                                                                                                           |
|     | This frog has unique round fingertips, in contrast to other glassfrogs' more straight fingertips. Therefore, I decided to name it Mitten Torrent Frog because it looks like it is wearing mittens. The frog also looks very comfortable and peaceful, which is how I feel when I wear new mittens in the winter. For its scientific name, I chose <i>Hyloscirtus covidia</i> because this frog will be named during the COVID-19 pandemic, which has affected many people worldwide. This opportunity to name this frog has brought me a lot of happiness and hope during the pandemic, and I think its name should honor the pandemic, so it can be remembered for years to come.                                                                                                                                                                                                                                                                                                                                                                                                                                                                                                          |
| 396 | <b>Green Lantern Frog</b>   Lucy Hemler, 8, USA                                                                                                                                                                                                                                                                                                                                                                                                                                                                                                                                                                                                                                                                                                                                                                                                                                                                                                                                                                                                                                                            |
|     | I chose this name because it is green and it changes colors.                                                                                                                                                                                                                                                                                                                                                                                                                                                                                                                                                                                                                                                                                                                                                                                                                                                                                                                                                                                                                                                                                                                                |
| 397 | <b>Chocolate Frog</b> <i>Hyloscirtus scelerisque</i>   Lucy Harnack, 9, USA                                                                                                                                                                                                                                                                                                                                                                                                                                                                                                                                                                                                                                                                                                                                                                                                                                                                                                                                               |
|     | I thought this name would be good, because the color of the frog's eyes. I also thought this name because scientists found this specie in the Choco Cloud forest.                                                                                                                                                                                                                                                                                                                                                                                                                                                                                                                                                                                                                                                                                                                                                                                                                                                                                                                                                                                                                           |
| 398 | <b>Mira Mira</b>   Lucy McEachen, 12, USA                                                                                                                                                                                                                                                                                                                                                                                                                                                                                                                                                                                                                                                                                                                                                                                                                                                                                                                                                                                                                                                                  |
|     | I named it my name because I love frogs. They are so cute, My friends name is Mira and she loves them so much. Her favorite animal is frogs and she loves green also.                                                                                                                                                                                                                                                                                                                                                                                                                                                                                                                                                                                                                                                                                                                                                                                                                                                                                                                                                                                                                       |
| 399 | <b>Quinche Cutie Frog</b> <i>Bellus Infantem</i>   Lucy Wright, 16, England                                                                                                                                                                                                                                                                                                                                                                                                                                                                                                                                                                                                                                                                                                                                                                                                                                                                                                                                                                                                                                                                                                                 |
|     | This is a really cute frog and I chose the name to match. You said I should adapt the name to how it looks but the Male and female look very different and they also shift their colour. That meant it was hard to pin down characteristics to describe except for its cuteness                                                                                                                                                                                                                                                                                                                                                                                                                                                                                                                                                                                                                                                                                                                                                                                                                                                                                                             |
| 400 | <b>The Green Awa Apsaras Torrent Frog</b>   Lucy Underwood, 17, United Kingdom                                                                                                                                                                                                                                                                                                                                                                                                                                                                                                                                                                                                                                                                                                                                                                                                                                                                                                                                    |
|     | Being a torrent frog and found near water in the Cloud Forests, I wanted to embody this in the name, so using the information of the habitat and the cloud forests, I researched words related to water and clouds. I fell upon the word Apsaras, which in Indian means 'from the waters', and instantly fell in love with it! It seemed a short and sweet fitting name with a fitting meaning, and further research led to my discovery that an apsara is also a female spirit of the clouds and water in Hindu and Buddhist culture, reinforcing these ties with water, where the frogs are found and their habitats within the cloud forests. These spirits, in the culture, also possess immense skill, which I would expect from these creatures, and demonstrated through their ability to climb trees and change colour, but mainly being of a predominant green, or chartreuse shade. Additionally, the local Awa people are dedicated to conserving these frogs and therefore, I wanted to honour them with the name. The name I have chosen seeks to mark a new beginning with the element of spirituality adding a sense of hope for the conservation and future of these frogs! |
| 401 | <b>glizzy gobbler</b>   Luke Szollos, 10, USA                                                                                                                                                                                                                                                                                                                                                                                                                                                                                                                                                                                                                                                                                                                                                                                                                                                                                                                                                                                                                                                            |
|     | glizzy gobbler son especiales                                                                                                                                                                                                                                                                                                                                                                                                                                                                                                                                                                                                                                                                                                                                                                                                                                                                                                                                                                                                                                                                                                                                                               |
| 402 | <b>Greg Greg</b>   Luke Watson, 17, USA                                                                                                                                                                                                                                                                                                                                                                                                                                                                                                                                                                                                                                                                                                                                                                                                                                                                                                                                                                                                                                                                                                                                                     |
|     | I chose this name because this frog gave me a Greg kind of vibe. So I would do what any normal person would do, name it greg.                                                                                                                                                                                                                                                                                                                                                                                                                                                                                                                                                                                                                                                                                                                                                                                                                                                                                                                                                                                                                                                               |
| 403 | <b>Spotted Watermelon Frog</b> <i>Citrullus lanatus</i>   Lulu Herrera, 11, America                                                                                                                                                                                                                                                                                                                                                                                                                                                                                                                                                                                                                                                                                                                                                                                                                                                                                                                                                                                                                      |
|     | I chose spotted watermelon because the frog looked like a spotted watermelon if it wasn't ripe yet. I also looked more into Ecuador and found out that is is well know for its watermelon, so I thought it fit in well.                                                                                                                                                                                                                                                                                                                                                                                                                                                                                                                                                                                                                                                                                                                                                                                                                                                                                                                                                                     |
| 404 | <b>Faith Frog</b> <i>Hyloscirtus Fidei</i>   Luther Clayton, 18, United Kingdom                                                                                                                                                                                                                                                                                                                                                                                                                                                                                                                                                                                                                                                                                                                                                                                                                                                                                                                                       |
|     | To still be discovering new species of both flora and fauna around the world in 2020 is a testament to how beautifully extensive the natural world is, and how little we still know about it, despite what we may think. Finding this frog species is a strong sign of faith for the future - so I suggest faith (Fidei) to be its name.                                                                                                                                                                                                                                                                                                                                                                                                                                                                                                                                                                                                                                                                                                                                                                                                                                                    |
| 405 | <b>Green Croissant</b>   Lydia Smith, 8, USA                                                                                                                                                                                                                                                                                                                                                                                                                                                                                                                                                                                                                                                                                                                                                                                                                                                                                                                                                                                                                                                             |
|     | I chose this name because it is green and it is as big as a croissant.                                                                                                                                                                                                                                                                                                                                                                                                                                                                                                                                                                                                                                                                                                                                                                                                                                                                                                                                                                                                                                                                                                                      |

 = Winner  
 = Runner-Up  
 = Contributor  
 = Finalist  
 = Semi-Finalist  
 = Special Recognition  
 = Science & Research Award  
 = Creativity Award  
 = Inspiring Conservation Award  
 = Junior Scientist Award (12 & under)

## Species Naming Competition Full List of Entries

|     |                                                                                                                                                                                                                                                                                                                                                                                                                                                                                                                                                                                                                                                                                                                                                                                                                                                                           |
|-----|---------------------------------------------------------------------------------------------------------------------------------------------------------------------------------------------------------------------------------------------------------------------------------------------------------------------------------------------------------------------------------------------------------------------------------------------------------------------------------------------------------------------------------------------------------------------------------------------------------------------------------------------------------------------------------------------------------------------------------------------------------------------------------------------------------------------------------------------------------------------------|
| 406 | <b>Spring Hopper</b>   Mace Barker, 5, USA ●                                                                                                                                                                                                                                                                                                                                                                                                                                                                                                                                                                                                                                                                                                                                                                                                                              |
|     | I chose this name because it reminds me of spring and because it's a good jumper.                                                                                                                                                                                                                                                                                                                                                                                                                                                                                                                                                                                                                                                                                                                                                                                         |
| 407 | <b>Round Fingered Glass Frog</b> <i>Digitis Per Speculum Ranae</i>   Maira Parsons, 11, USA ●                                                                                                                                                                                                                                                                                                                                                                                                                                                                                                                                                                                                                                                                                                                                                                             |
|     | I chose this name because the frog had roped fingers and part if it is clear, like glass.                                                                                                                                                                                                                                                                                                                                                                                                                                                                                                                                                                                                                                                                                                                                                                                 |
| 408 | <b>Chocorana</b> <i>Scelerisque Ranae</i>   Majo Zurita, 20, Ecuador                                                                                                                                                                                                                                                                                                                                                                                                                                                                                                                                                                                                                                                                                                                                                                                                      |
|     | My dog's name is Chocopan, and this frog lives in the Chocó. So, I figured it'd be cool if I could do a wordplay with this.                                                                                                                                                                                                                                                                                                                                                                                                                                                                                                                                                                                                                                                                                                                                               |
| 409 | <b>Leaf frog</b> <i>Folium rana</i>   malcolm deheck, 9, USA ●                                                                                                                                                                                                                                                                                                                                                                                                                                                                                                                                                                                                                                                                                                                                                                                                            |
|     | because it looks like it is always on leaves                                                                                                                                                                                                                                                                                                                                                                                                                                                                                                                                                                                                                                                                                                                                                                                                                              |
| 410 | <b>Papaya frog</b> <i>Reciproca</i>   Mana Komatsu, 16, UK                                                                                                                                                                                                                                                                                                                                                                                                                                                                                                                                                                                                                                                                                                                                                                                                                |
|     | The sexual dimorphic colours resemble papayas. The female looks like the outside skin of the papaya and the male looks like the brown insides of a papaya. I chose the Latin word for 'inverse' or reciprocal due to the inversed colours of the opposite sexes like an inversed papaya.                                                                                                                                                                                                                                                                                                                                                                                                                                                                                                                                                                                  |
| 411 | <b>lime skin frog</b>   marcus landon, Unspecified, canada                                                                                                                                                                                                                                                                                                                                                                                                                                                                                                                                                                                                                                                                                                                                                                                                                |
|     | I chose this name because its skin is very similar to a lime tone.                                                                                                                                                                                                                                                                                                                                                                                                                                                                                                                                                                                                                                                                                                                                                                                                        |
| 412 | <b>Sticky-handed frog</b> <i>Hyloscirtus rotundigotos</i>   Maria Caro, Unspecified, Dominican Republic ●                                                                                                                                                                                                                                                                                                                                                                                                                                                                                                                                                                                                                                                                                                                                                                 |
|     | The scientific name comes from the unique round fingertips of the frog. Rotun comes from the Latin word "rotundu", which means round and digitos means fingers in Latin. I chose the common name, Sticky-handed frog, because there is a toy I loved to play with when I was little, called sticky hands, which is made out of a sticky jelly-like material that sticks on to things. This toy reminds me very much of the frog's fingertips.                                                                                                                                                                                                                                                                                                                                                                                                                             |
| 413 | <b>Wazowski</b>   Maria Amelia Taveras, 16, Dominican Republic                                                                                                                                                                                                                                                                                                                                                                                                                                                                                                                                                                                                                                                                                                                                                                                                            |
|     | I choose this word reference to one of the most famous disney characters Mike Wazowski, I got inspired by his greenish tone that he also shares with this new frog species.                                                                                                                                                                                                                                                                                                                                                                                                                                                                                                                                                                                                                                                                                               |
| 414 | <b>Amber Arbor Frog</b> <i>Digitum natibian</i>   Maria Emilia Khamis, 15, Dominican Republic ●                                                                                                                                                                                                                                                                                                                                                                                                                                                                                                                                                                                                                                                                                                                                                                           |
|     | I chose these names because of the frog's distinctive characteristics. I preferred to add Amber Arbor Frog as its common name because of the frog's beautiful amber eyes. Arbor, on the other hand, means tree. I added "tree" to the new specie's name since it comes from the tree frog family. For the specie's scientific name, I decided to name it Digitum natibian. "Digitum" means finger-prints. In this specie's case, its round fingertips set it apart from its neighbors. "Natibian," the specific epithet, is divided into two words: indigenous, which means "nativus" in Latin, and "-ibian." I determined to add "nat" as a part of indigenous for this specie comes from an indigenous nation, Ecuador. Finally, "-ibian" was added as a suffix for amphibian since frogs are amphibians, vertebrates that need water or a moist environment to thrive. |
| 415 | <b>Kermit.</b>   Maria Gabriella Licairac, 16, Dominican Republic                                                                                                                                                                                                                                                                                                                                                                                                                                                                                                                                                                                                                                                                                                                                                                                                         |
|     | Cause it reminds me of a fictional show called the muppets. Kermit the frog plays the main character in the movie.                                                                                                                                                                                                                                                                                                                                                                                                                                                                                                                                                                                                                                                                                                                                                        |
| 416 | <b>Rana militar dedos de bombillo</b> <i>Hyloscirtus bombillae</i>   María José López Peña, 22, Ecuador                                                                                                                                                                                                                                                                                                                                                                                                                                                                                                                                                                                                                                                                                                                                                                   |
|     | Rana "militar" because militar is how Ecuadorian people normally refer to the army, the way it hides by camouflage reminds me of them. In fact, Chical has an army guard surrounding it constantly because of illicit traffic on the border with Colombia. And "dedos de bombillo" because of its spheral-shaped fingertips, "bombillo" is the popular name among Ecuadorians for the Christmas ball ornaments hanging on the tree. It kinda has a vibe of Christmas as well!                                                                                                                                                                                                                                                                                                                                                                                             |
| 417 | <b>Rana Ojona (Luminosa)</b> <i>Hylidae lucidum</i>   María Teresa Alvarado Jaramillo, 12, Ecuador ●                                                                                                                                                                                                                                                                                                                                                                                                                                                                                                                                                                                                                                                                                                                                                                      |
|     | Me gustó la combinación entre hylidae que era el nombre de su familia y lucidum que significa brillante. La ranita, al verla se la veía hermosa y brillante, de ahí la idea y para el nombre común tuve la idea de sus grandes ojos y color.                                                                                                                                                                                                                                                                                                                                                                                                                                                                                                                                                                                                                              |
| 418 | <b>Cinderella</b>   Marie Hess, 4, USA ●                                                                                                                                                                                                                                                                                                                                                                                                                                                                                                                                                                                                                                                                                                                                                                                                                                  |
|     | Because I like Cinderella's name and I wanted to name it that.                                                                                                                                                                                                                                                                                                                                                                                                                                                                                                                                                                                                                                                                                                                                                                                                            |
| 419 | <b>pretty brown eyes swisher sweet</b>   Marissa Walker, 21, US                                                                                                                                                                                                                                                                                                                                                                                                                                                                                                                                                                                                                                                                                                                                                                                                           |
|     | beyoncé                                                                                                                                                                                                                                                                                                                                                                                                                                                                                                                                                                                                                                                                                                                                                                                                                                                                   |

 = Winner  
 = Runner-Up  
 = Contributor  
 = Finalist  
 = Semi-Finalist  
 = Special Recognition  
 = Science & Research Award  
 = Creativity Award  
 = Inspiring Conservation Award  
 = Junior Scientist Award (12 & under)

## Species Naming Competition Full List of Entries

|     |                                                                                                                                                                                                                                                                                                                                                                                                                                                                            |
|-----|----------------------------------------------------------------------------------------------------------------------------------------------------------------------------------------------------------------------------------------------------------------------------------------------------------------------------------------------------------------------------------------------------------------------------------------------------------------------------|
| 420 | <b>Mountain Leaf Frog</b> <i>Mons Folium Hyloscirtus</i>   Markuss Bickovs, 13, United Kingdom                                                                                                                                                                                                                                                                                                                                                                             |
|     | The fact that you showed me were you found it suggests to me that lives in some what mountainous areas which is why it has mountain in its name and the leaf comes from the fact that the frog can camouflage onto different leaves to hide from its predators so that's why. This might not be the greatest name but I think this name makes a lot of sense.                                                                                                              |
| 421 | <b>The Shamrock Forest Frog</b>   Markyel Butler, 16, USA                                                                                                                                                                                                                                                                                                                                                                                                                  |
|     | Because that's the color the frog looks like and i feel the name fits the frog. Hope He gets this Name.                                                                                                                                                                                                                                                                                                                                                                    |
| 422 | <b>Carchian Adapting Glass Frog</b> <i>Hylocirtus aptans carchinensis</i>   Marlena Kemper, 17, Germany                                                                                                                                                                                                                                                                                                                                                                    |
|     | Species names should be both descriptive and clear, my choice suggests the habitat as well as its distinctive feature to change skin color. The Latin name shows both of these descriptors as well.                                                                                                                                                                                                                                                                        |
| 423 | <b>Leaf back dot frog</b>   Marshall Williams, 11, Canada ●                                                                                                                                                                                                                                                                                                                                                                                                                |
|     | Because in most pictures the frog is on a leaf and has a back that is full of dots.                                                                                                                                                                                                                                                                                                                                                                                        |
| 424 | <b>Darling Cloud frog</b> <i>Hylocirtus oculi dei</i>   Marta Cerkasina, 16, Latvian/Uk ●                                                                                                                                                                                                                                                                                                                                                                                  |
|     | Their skin reminds me of my avocado plant called Darling and they live in the cloud forests so 'Darling Cloud'. I chose 'oculi dei' because I love their eyes and I think of frogs as little gods because I love them so much.                                                                                                                                                                                                                                             |
| 425 | <b>rana de arbol</b>   Martin Aponte, 10, USA ●                                                                                                                                                                                                                                                                                                                                                                                                                            |
|     | My rana se llama rana de arbol porque cuando el macho y laembra estan juntos paresen un arbol y tambien por Que el macho parerse a un rama y la abraza parase a una hoja.                                                                                                                                                                                                                                                                                                  |
| 426 | <b>Rana equus spirit</b> <i>Hyloscirtus mediomundiranae</i>   Matias lopez, 16, Ecuador ●                                                                                                                                                                                                                                                                                                                                                                                  |
|     | Rana "equus" significa caballo en latin y a las personas de tulcan se las llama caballo y spirit es el caballo protagonista en la pelicula de disney spirit el caballo indomable porque las personas de tulcan somos inndomables                                                                                                                                                                                                                                           |
| 427 | <b>Colombian perching tree frog</b> <i>Eptesicus fuscusarbor ranae</i>   Matilda S, 10, USA ●                                                                                                                                                                                                                                                                                                                                                                              |
|     | I chose this name because I'm many of the pictures the frog is perching on leaves, sticks and other things you could find in a rainforest, I noticed that the frog was in Colombia so I thought that was an important aspect of the frog, I did not want to go into much detail of the exact place I'm Columbia because that might confuse people since not all people might know if that place is in Columbia.                                                            |
| 428 | <b>Terry Fox Glass Frog</b>   Matthew McAllister, 11, Canada ●                                                                                                                                                                                                                                                                                                                                                                                                             |
|     | I chose this name because Terry Fox is an inspiration to people everywhere.                                                                                                                                                                                                                                                                                                                                                                                                |
| 429 | <b>Fiery covid frog</b> <i>Ignea covid rana</i>   Matthew Joy, 16, Ireland                                                                                                                                                                                                                                                                                                                                                                                                 |
|     | I chose this name because in this crazy year of firsts from huge fires (which is where fiery came from) and pandemics (which is where covid came from) small wins are even more important to focus on. So this name is to honour the people who managed to discover this frog in these uncertain times and to show they never gave up working hard learn about the wildlife of the planet no matter what was thrown at them                                                |
| 430 | <b>Choco Andes Frog</b>   MAURICE MUNGA, 24, Kenya                                                                                                                                                                                                                                                                                                                                                                                                                         |
|     | It's a frog from the choco and tropical Andes forest bio region.                                                                                                                                                                                                                                                                                                                                                                                                           |
| 431 | <b>camonerious</b> <i>Clorenamos</i>   Max Hines, 15, England ●                                                                                                                                                                                                                                                                                                                                                                                                            |
|     | The name I chose for this new species of frog is based on two things. Firstly, the first part of the name 'cloren' is based on the pigment that makes leaves green, chlorophyll. I thought this could be a great way to show how the frog can camouflage itself on a leaf. Secondly, the second part of the name 'amos'. This part of the name is based on the Greek word 'atomos'. I chose this because I thought it would reflect the size of the frog since it's small. |
| 432 | <b>Ethan Landen</b> <i>Tuna</i>   Max Rolfinke, 21, USA                                                                                                                                                                                                                                                                                                                                                                                                                    |
|     | Ethan landen is an incredibly smart human being that has outcompetes many Davidson students in smarts but also overall sexiness. This man is a stud. He reminds me best of Jesus and Mohammed at the same time.                                                                                                                                                                                                                                                            |
| 433 | <b>Rounded Fingertip Chirping Frog</b>   Maximus Speelman, 8, USA ●                                                                                                                                                                                                                                                                                                                                                                                                        |
|     | I chose this name because the frog has round fingertips and makes a chirping sound.                                                                                                                                                                                                                                                                                                                                                                                        |

 = Winner  
 = Runner-Up  
 = Contributor  
 = Finalist  
 = Semi-Finalist  
 = Special Recognition  
 = Science & Research Award  
 = Creativity Award  
 = Inspiring Conservation Award  
 = Junior Scientist Award (12 & under)

## Species Naming Competition Full List of Entries

|     |                                                                                                                                                                                                                                                                                                                                                                                                                                                                                                                                                                                                                                                                                                                                                                                                                                                                                                                                                                                                                                                                                                                                                                                                                                                                 |
|-----|-----------------------------------------------------------------------------------------------------------------------------------------------------------------------------------------------------------------------------------------------------------------------------------------------------------------------------------------------------------------------------------------------------------------------------------------------------------------------------------------------------------------------------------------------------------------------------------------------------------------------------------------------------------------------------------------------------------------------------------------------------------------------------------------------------------------------------------------------------------------------------------------------------------------------------------------------------------------------------------------------------------------------------------------------------------------------------------------------------------------------------------------------------------------------------------------------------------------------------------------------------------------|
| 434 | <b>Scaleless Amphibians</b> <i>Salientidae</i>   Maylat Thewodros, 14, USA                                                                                                                                                                                                                                                                                                                                                                                                                                                                                                                                                                                                                                                                                                                                                                                                                                                                                                                                                                                                                                                                                                                                                                                      |
|     | I choose this name because Salientidae is a cold-blooded vertebrate animal incorporating the frogs, toads, and tree toads, which are esteemed by the complete nonappearance of a tail in the adult stage and by the personality of long strong hind limbs well suited to leaping and swimming. In addition, this name is called a Salientidae in Latin America but is actually called Salientia and was appealing to learn more about so I choose this name and researched more about and changed it to a Latin word. This name I choose is named as a frog and is an organism classified in its kingdom groups. The Salientidae is global and includes all frogs and toads from the world. The Salientidae also includes all extinct and living frogs that occur on all continents, but Antarctica and in all of the major biomes of the world. Another term for this name is “Anura” which is known as the order. In conclusion, I choose this name because it is a scientific name that is apart of the environment and parts of the world which is why many of these species get their names from where they live which is common for scientists to name. This is the name I choose and it has so many different physical characteristics to other species. |
| 435 | <b>Mango Froggy Jumpy</b>   Meadow WILLIAMSON, 4, United Kingdom ●                                                                                                                                                                                                                                                                                                                                                                                                                                                                                                                                                                                                                                                                                                                                                                                                                                                                                                                                                                                                                                                                                                                                                                                              |
|     | It is a mango colour (changes from green to yellow like the fruit when it ripens) it’s also a jumpy frog.                                                                                                                                                                                                                                                                                                                                                                                                                                                                                                                                                                                                                                                                                                                                                                                                                                                                                                                                                                                                                                                                                                                                                       |
| 436 | <b>Megan’s torrent frog</b> <i>Hyloscirtus Megani</i>   Megan Libke, 22, USA ●                                                                                                                                                                                                                                                                                                                                                                                                                                                                                                                                                                                                                                                                                                                                                                                                                                                                                                                                                                                                                                                                                                                                                                                  |
|     | Because my name is Megan                                                                                                                                                                                                                                                                                                                                                                                                                                                                                                                                                                                                                                                                                                                                                                                                                                                                                                                                                                                                                                                                                                                                                                                                                                        |
| 437 | <b>Chirping Chocó Frog</b> <i>Hylocirtus parvaoculos</i>   Meghan Yost, 17, USA ●                                                                                                                                                                                                                                                                                                                                                                                                                                                                                                                                                                                                                                                                                                                                                                                                                                                                                                                                                                                                                                                                                                                                                                               |
|     | The frog makes such a beautiful chirping noise I feel it should be recognized to detect even in the dark of the forest at night. The Chocó comes from the region the frog is found in as well as adds some nice alliteration to the name. The scientific name means “small eyes” considering the frog looks like it’s always squinting.                                                                                                                                                                                                                                                                                                                                                                                                                                                                                                                                                                                                                                                                                                                                                                                                                                                                                                                         |
| 438 | <b>Rana tornasolada awá</b> <i>Hyloscirtus iridescentia</i>   Melannie Núñez, 20, Ecuador                                                                                                                                                                                                                                                                                                                                                                                                                                                                                                                                                                                                                                                                                                                                                                                                                                                                                                                                                                                                                                                                                                                                                                       |
|     | El nombre común fue basado en que posee estás manchitas en su cuerpo color tornasolado y vive cerca de la comunidad Awá. El nombre científico traduje “tornasolado” al latín y esta fue la más convincente para mí.                                                                                                                                                                                                                                                                                                                                                                                                                                                                                                                                                                                                                                                                                                                                                                                                                                                                                                                                                                                                                                             |
| 439 | <b>Happy boi Frog</b>   Melody Edwards, 18, Australia                                                                                                                                                                                                                                                                                                                                                                                                                                                                                                                                                                                                                                                                                                                                                                                                                                                                                                                                                                                                                                                                                                                                                                                                           |
|     | I chose “happy boi” as the frogs name because they look like some pretty happy frogs and “boi” is a gender neutral term. We’re in 2020 let’s have fun with this frogs name, this will intrigue future generations and entice them to learn about this, and may other frogs which will lead to knowledge and knowledge is power.                                                                                                                                                                                                                                                                                                                                                                                                                                                                                                                                                                                                                                                                                                                                                                                                                                                                                                                                 |
| 440 | <b>Green forest</b> <i>Esther green</i>   Mia Sierra-Price, 6, USA ●                                                                                                                                                                                                                                                                                                                                                                                                                                                                                                                                                                                                                                                                                                                                                                                                                                                                                                                                                                                                                                                                                                                                                                                            |
|     | Because it’s green and live in a forest                                                                                                                                                                                                                                                                                                                                                                                                                                                                                                                                                                                                                                                                                                                                                                                                                                                                                                                                                                                                                                                                                                                                                                                                                         |
| 441 | <b>Color-shifting Torrent</b> <i>pandemus</i>   Mia Perfetti, 14, USA ●                                                                                                                                                                                                                                                                                                                                                                                                                                                                                                                                                                                                                                                                                                                                                                                                                                                                                                                                                                                                                                                                                                                                                                                         |
|     | I chose the common name because the frog shifts colors depending on its environment and it also specifies that it is a torrent frog, and I chose the scientific name because it means pandemic and the frog was discovered during a pandemic.                                                                                                                                                                                                                                                                                                                                                                                                                                                                                                                                                                                                                                                                                                                                                                                                                                                                                                                                                                                                                   |
| 442 | <b>El Tulcáncito</b>   Mía Pagano, 15, República Dominicana ●                                                                                                                                                                                                                                                                                                                                                                                                                                                                                                                                                                                                                                                                                                                                                                                                                                                                                                                                                                                                                                                                                                                                                                                                   |
|     | I chose the name “Tulcáncito” because of the county in which the frog is from, Tulcán, Ecuador. I also added the suffix “cito”, meaning little. This is because the frog is relatively small in size.                                                                                                                                                                                                                                                                                                                                                                                                                                                                                                                                                                                                                                                                                                                                                                                                                                                                                                                                                                                                                                                           |
| 443 | <b>Tulcán Torrent Frog</b> <i>Hyloscirtus Clara futura</i>   Michael Solomon, 15, Kenya ● ● ●                                                                                                                                                                                                                                                                                                                                                                                                                                                                                                                                                                                                                                                                                                                                                                                                                                                                                                                                                                                                                                                                                                                                                                   |
|     | I’m not exactly a latin expert so I had to do a lot of research before I gave the frog its name but I finally settled with the name “Clara Futara” which means bright future because although 2020 was not the best of years we have discovered a new species and it signifies that the animal kingdom is still going strong and we should value them a lot so we can truly achieve a “Clara Futara”                                                                                                                                                                                                                                                                                                                                                                                                                                                                                                                                                                                                                                                                                                                                                                                                                                                            |
| 444 | <b>Cooper color frog</b> <i>De cooper</i>   Michaela Goodson, Unspecified, USA                                                                                                                                                                                                                                                                                                                                                                                                                                                                                                                                                                                                                                                                                                                                                                                                                                                                                                                                                                                                                                                                                                                                                                                  |
|     | it color changes and i think it sounds good and i thought of this from a show i watch so ya                                                                                                                                                                                                                                                                                                                                                                                                                                                                                                                                                                                                                                                                                                                                                                                                                                                                                                                                                                                                                                                                                                                                                                     |
| 445 | <b>Bolpy</b> <i>Appeaelisa</i>   MICHELLE Grisby, 5, USA ●                                                                                                                                                                                                                                                                                                                                                                                                                                                                                                                                                                                                                                                                                                                                                                                                                                                                                                                                                                                                                                                                                                                                                                                                      |
|     | I choose the name the cat is a great name I like                                                                                                                                                                                                                                                                                                                                                                                                                                                                                                                                                                                                                                                                                                                                                                                                                                                                                                                                                                                                                                                                                                                                                                                                                |

 = Winner  
 = Runner-Up  
 = Contributor  
 = Finalist  
 = Semi-Finalist  
 = Special Recognition  
 = Science & Research Award  
 = Creativity Award  
 = Inspiring Conservation Award  
 = Junior Scientist Award (12 & under)

## Species Naming Competition Full List of Entries

|     |                                                                                                                                                                                                                                                                                                                                                                                                                                                                                                                                                                                                                                                                                                                                                                                                                                                                                                                                                                                                                     |
|-----|---------------------------------------------------------------------------------------------------------------------------------------------------------------------------------------------------------------------------------------------------------------------------------------------------------------------------------------------------------------------------------------------------------------------------------------------------------------------------------------------------------------------------------------------------------------------------------------------------------------------------------------------------------------------------------------------------------------------------------------------------------------------------------------------------------------------------------------------------------------------------------------------------------------------------------------------------------------------------------------------------------------------|
| 446 | <b>Hyloscirtus Luminosa</b> <i>Hyloscirtus</i>   Michelle Realpe, 14, Ecuador                                                                                                                                                                                                                                                                                                                                                                                                                                                                                                                                                                                                                                                                                                                                                                                                                                                                                                                                       |
|     | Decidi llamarle Hyloscirtus Luminosa, por varias razones una fue porque descubri que este tipo de rana suele cambiar de color dependiendo en el entorno en el que se encuentre. Cambia a colores claros como el amarillo, verde entre otros, y sugiero que estos son colores vivos que respresentan algo unico en esta especie. Pero lo hacen por una simple razon que es: protegerse de los depredadores que puedan hacerles daño. La palabra luminosa fue por un personaje de una pelicula que me agrado entonces decidi que este especie de rana debe tener un nombre simple pero que exprese en una sola palabra como es, donde vive, su forma fisica entre otras cosas. Lei que viven en un habitat tranquilo y claro al igual que sus rasgos fisicos . Bueno, para terminar quisiera decir que esta rana es especial y merece un nombre exepcional que la distinga de las otras especies que existen en el mundo ya que esta es de mayor admiracion y solo existe una especie asi y no hay otra igual a esta. |
| 447 | <b>The Round-Toed Golondrinas Torrent Frog</b> <i>Hyloscirtus circinatus</i>   Mimi Johnson, 15, England ●                                                                                                                                                                                                                                                                                                                                                                                                                                                                                                                                                                                                                                                                                                                                                                                                                                                                                                          |
|     | Common name - the frog's round fingers are a unique distinction from its near relatives, and I think they are really cute, so I think they should definitely be part of its name! I like the word 'Golondrinas' and it makes me think of rushing water, which is fitting as the frog lives in an area with lots of running water. It is also nice that the frog can be named after its habitat. Scientific name - As the frog has round fingers, I thought they should be referred to in its name as it is a unique and distinctive trait. circinatus means round I believe.                                                                                                                                                                                                                                                                                                                                                                                                                                        |
| 448 | <b>Limeopecas</b> <i>Celeri exactoris</i>   Minerva Lara, 24, USA                                                                                                                                                                                                                                                                                                                                                                                                                                                                                                                                                                                                                                                                                                                                                                                                                                                                                                                                                   |
|     | i choose limeopecas becuase its sexual dimorphism. As female it has freckles and makes are green as lime. The other name is swift driver in english .. two celebrities i like at the moments last names.                                                                                                                                                                                                                                                                                                                                                                                                                                                                                                                                                                                                                                                                                                                                                                                                            |
| 449 | <b>Ecuadorian speckled frog</b> <i>Aequatorianaesparso vellere ranae</i>   Mira Gupta, 11, USA ●                                                                                                                                                                                                                                                                                                                                                                                                                                                                                                                                                                                                                                                                                                                                                                                                                                                                                                                    |
|     | I chose this name because the frog's birthplace is in Equador, so that's where Ecuadorian comes from. Some frogs are named by its physical characteristics, so speckled, or brown speckled, is in the frog's tiny brown spots on it's skin. I think this name would fit this unique frog.                                                                                                                                                                                                                                                                                                                                                                                                                                                                                                                                                                                                                                                                                                                           |
| 450 | <b>mirafrog</b> <i>miraculous hispi</i>   Miranda Grullon, 16, Dominican Republic                                                                                                                                                                                                                                                                                                                                                                                                                                                                                                                                                                                                                                                                                                                                                                                                                                                                                                                                   |
|     | MiraFrog                                                                                                                                                                                                                                                                                                                                                                                                                                                                                                                                                                                                                                                                                                                                                                                                                                                                                                                                                                                                            |
| 451 | <b>Michi frog</b> <i>Hylocirtus Chtypontas (The knocking frog)</i>   Mobin Sharifzadeh, 16, Canada                                                                                                                                                                                                                                                                                                                                                                                                                                                                                                                                                                                                                                                                                                                                                                                                                                                                                                                  |
|     | I chose the name Michi because the frog reminded me of the cartoon character, Michigan J. Frog. I shortened it to Michi so it can roll off the tongue better. As for the scientific name, I chose Hylocirtus Chtypontas (assuming it translates to something close to "The knocking frog") because the sound that the frog makes is quite unique in my opinion.                                                                                                                                                                                                                                                                                                                                                                                                                                                                                                                                                                                                                                                     |
| 452 | <b>Color Changing</b> <i>Color Immutatus</i>   Mohammad Abu Bakr, 11, America ●                                                                                                                                                                                                                                                                                                                                                                                                                                                                                                                                                                                                                                                                                                                                                                                                                                                                                                                                     |
|     | I chose this name because of the fact that this frog has the ability to color change. "Color immutatus" means color change. That is why I chose this name.                                                                                                                                                                                                                                                                                                                                                                                                                                                                                                                                                                                                                                                                                                                                                                                                                                                          |
| 453 | <b>Kermit</b> <i>Kermiticus</i>   Morgan Braswell, 24, USA                                                                                                                                                                                                                                                                                                                                                                                                                                                                                                                                                                                                                                                                                                                                                                                                                                                                                                                                                          |
|     | My dad and I always watched the muppets when I was younger so I thought I'd submit the name in his honor and also so scientists/students can have a laugh later on.                                                                                                                                                                                                                                                                                                                                                                                                                                                                                                                                                                                                                                                                                                                                                                                                                                                 |
| 454 | <b>Ecuadorian Speckled-Pear Torrent Frog</b> <i>Hyloscirtus pirum</i>   Mrs. Dominski's Grade 6 Class Our Lady of Mount Carmel E.S, Niagara Falls, ON, 11, Canada ●●●●                                                                                                                                                                                                                                                                                                                                                                                                                                                                                                                                                                                                                                                                                                                                                                                                                                              |
|     | We chose the name because the frog is found in the Choco Cloud Forrest in Ecuador. The male frog has distinct speckles on his green skin that looks similar to the skin of a pear. The female frog is also a vivid green. The frog lives near running water and is referred to as a Torrent Frog, rather than a Tree Frog as it is more specific to its habitat.                                                                                                                                                                                                                                                                                                                                                                                                                                                                                                                                                                                                                                                    |
| 455 | <b>Dappled Torrent Frog</b> <i>Hyloscirtus Macuspeculo</i>   Musa Hussain, 14, England ●●●●                                                                                                                                                                                                                                                                                                                                                                                                                                                                                                                                                                                                                                                                                                                                                                                                                                                                                                                         |
|     | As I want to become a Wildlife Conservationist and Zoologist in the future, I put immense thought into naming this frog. The common name comes from the amphibians' distinctive brown spots that cover its skin, paired with its identification as a torrent frog, thus being called The Dappled Torrent Frog. I chose this as the feature to describe this frog, as it something that immediately catches your eye immediately as you lay eyes on the frog. The scientific name starts (of course) with Hyloscirtus as the Genus, and then the specific name I chose: Macuspeculo, this is a combination of the Latin words Macula (meaning spot, or rounded mark) and Speculo (glass, referring to it being a glass frog). Thank you for reading this, and I do hope you consider my naming options for the frog.                                                                                                                                                                                                 |

 = Winner  
 = Runner-Up  
 = Contributor  
 = Finalist  
 = Semi-Finalist  
 = Special Recognition  
 = Science & Research Award  
 = Creativity Award  
 = Inspiring Conservation Award  
 = Junior Scientist Award (12 & under)



## Species Naming Competition Full List of Entries

|     |                                                                                                                                                                                                                                                                                                                                                                                                                                                                                                                                                                                                                                                                                                                                                                                                                                                                                                                                                                                        |
|-----|----------------------------------------------------------------------------------------------------------------------------------------------------------------------------------------------------------------------------------------------------------------------------------------------------------------------------------------------------------------------------------------------------------------------------------------------------------------------------------------------------------------------------------------------------------------------------------------------------------------------------------------------------------------------------------------------------------------------------------------------------------------------------------------------------------------------------------------------------------------------------------------------------------------------------------------------------------------------------------------|
| 456 | <b>Slimy frog</b> <i>Ljigavi</i>   N A, 11, Unspecified ●                                                                                                                                                                                                                                                                                                                                                                                                                                                                                                                                                                                                                                                                                                                                                                                                                                                                                                                              |
|     | I chose the name as when I saw the frog it looked slimy                                                                                                                                                                                                                                                                                                                                                                                                                                                                                                                                                                                                                                                                                                                                                                                                                                                                                                                                |
| 457 | <b>Cantante in silva beira berdea</b> <i>hyloscirtus</i>   Natalia Valentina Celín Robayo, Unspecified, Ecuador ●                                                                                                                                                                                                                                                                                                                                                                                                                                                                                                                                                                                                                                                                                                                                                                                                                                                                      |
|     | El nombre común lo escogí por su hermoso canto y el científico por su apariencia física.                                                                                                                                                                                                                                                                                                                                                                                                                                                                                                                                                                                                                                                                                                                                                                                                                                                                                               |
| 458 | <b>Spotted Viridescent Hyla</b> <i>Negro quodcumque furvum</i>   Natalie Brinquis, 10, USA ●                                                                                                                                                                                                                                                                                                                                                                                                                                                                                                                                                                                                                                                                                                                                                                                                                                                                                           |
|     | Common name: I named it because it has spots and it is green. Scientific name: I named it because after all the African american people that got harassed.                                                                                                                                                                                                                                                                                                                                                                                                                                                                                                                                                                                                                                                                                                                                                                                                                             |
| 459 | <b>Raniuxis</b> <i>humilitate potissimum</i>   Nataly Racines, 14, Ecuador                                                                                                                                                                                                                                                                                                                                                                                                                                                                                                                                                                                                                                                                                                                                                                                                                                                                                                             |
|     | Yo le puse este nombre porque rani viene de rana y uxis viene de la palabra existir y humildad se que no parece, pero lo primero que pensé eran en esas dos características porque en la pandemia que estamos viviendo tenemos que tener esas dos características a mi parecer ya que la humildad es un valor muy especial y que no todo el mundo lo tiene y el existir es algo que ha muchas personas se lo arrebatan cada día porque simplemente tenemos que estar agradecidos por lo que nos han dado y el poder vivir un día mas en esta vida tan hermosa. Y además pienso que es un nombre que es muy actual y se escucha fresco y tambien no es muy difícil de pronunciar porque quería que fuese practico y fresco y relajado, este nombre me dio esa sensación que quería para nombrar a esta nueva especie.                                                                                                                                                                   |
| 460 | <b>Rana Canicas Claras</b> <i>Hyloscirtus Patet Marmoribus</i> .   Nathalia Cordero, 14, Ecuador                                                                                                                                                                                                                                                                                                                                                                                                                                                                                                                                                                                                                                                                                                                                                                                                                                                                                       |
|     | En mi opinión, yo pienso que el nombre “Canicas Claras” es uno muy bueno ya que este hace referencia a los pequeños ojos del animal que son claros y muy brillantes. También incluye el concepto de la forma de sus ojos, que son perfectamente redondos y que parecen de vidrio; además, pueden fijarse en muchos lados; lo mismo pasa con las canicas, ya que estas ruedan a diferentes lugares y lo hacen muy rápido. La rapidez de los ojos de la rana es increíble al igual que su posibilidad de adherirse a superficies bastante húmedas que por lo general están en los ríos más corrientosos. También me base un poco en el lugar donde fue encontrado que es en la región del Chocó; ya que ahí la gente se entretiene mucho más con los juegos que son de mesa o al aire libre, como por ejemplo: las canicas. Esta sería una gran propuesta ya que encaja en todas las características del ser vivo y más que nada suena bastante bien. Espero que les guste mi propuesta. |
| 461 | <b>Young Olympian Frog</b> <i>juvenatator</i>   Nathan Mok, 15, Canada ●                                                                                                                                                                                                                                                                                                                                                                                                                                                                                                                                                                                                                                                                                                                                                                                                                                                                                                               |
|     | The name “Young Olympian” was chosen to reference the great fall the young must make; their are laid on leaves over water as eggs, and must fall into the water below, similar to the high Platform Dives in the Olympics. “Juvenatator” is supposed to mean “young swimmer”.                                                                                                                                                                                                                                                                                                                                                                                                                                                                                                                                                                                                                                                                                                          |
| 462 | <b>Chirping frog</b> <i>Hyloscirtus minurritio</i>   Nathan Carroll, 16, America                                                                                                                                                                                                                                                                                                                                                                                                                                                                                                                                                                                                                                                                                                                                                                                                                                                                                                       |
|     | Well when i heard how the frog sounds because it sounds like a bird chirping                                                                                                                                                                                                                                                                                                                                                                                                                                                                                                                                                                                                                                                                                                                                                                                                                                                                                                           |
| 463 | <b>Green freckled frog</b> <i>Sciat impetiginem ortam esse ranae viridi</i>   Nathaniel Blais, 12, Canada ●                                                                                                                                                                                                                                                                                                                                                                                                                                                                                                                                                                                                                                                                                                                                                                                                                                                                            |
|     | I chose this name because the frog both female and male have little freckles! I think they look adorable and it would make for a great name.                                                                                                                                                                                                                                                                                                                                                                                                                                                                                                                                                                                                                                                                                                                                                                                                                                           |
| 464 | <b>shadow water frog</b> <i>Rana umbra aqua</i>   NaZyia Macon, 14, USA ●                                                                                                                                                                                                                                                                                                                                                                                                                                                                                                                                                                                                                                                                                                                                                                                                                                                                                                              |
|     | The place where this frog lives is surrounded by mist which brings to mind for me shadows. There is so much water in this area this frog has had to adapt and devlop the ability to stick to wet surfaces. This is the Spider-Man frog of the forest.                                                                                                                                                                                                                                                                                                                                                                                                                                                                                                                                                                                                                                                                                                                                  |
| 465 | <b>aequator</b> <i>Hyloscirtus</i>   Nebyou Tegene, 14, USA ●                                                                                                                                                                                                                                                                                                                                                                                                                                                                                                                                                                                                                                                                                                                                                                                                                                                                                                                          |
|     | It is found in Ecuador which means equator and of course because this frog is closely related to the <i>Hyloscirtus mashpi</i>                                                                                                                                                                                                                                                                                                                                                                                                                                                                                                                                                                                                                                                                                                                                                                                                                                                         |
| 466 | <b>Cloud Chocó frog</b> <i>Nubes Chocó rana</i>   Neve Hawes, 14, England ● ●                                                                                                                                                                                                                                                                                                                                                                                                                                                                                                                                                                                                                                                                                                                                                                                                                                                                                                          |
|     | I picked this name because of where the frog was found. The forest is known and the “cloud forest” and the word cloud stood out for me .I then chose the Chocó because of the bioregion found.                                                                                                                                                                                                                                                                                                                                                                                                                                                                                                                                                                                                                                                                                                                                                                                         |
| 467 | <b>Ridge-nosed treefrog</b> <i>Hyloscirtus Milleri</i>   Nicholas Bednorz, 17, Australia ● ●                                                                                                                                                                                                                                                                                                                                                                                                                                                                                                                                                                                                                                                                                                                                                                                                                                                                                           |
|     | I chose the common name due to the ridge like structure on the nose of the frog, particularly visible on the females. I chose the scientific name as it is the surname of my geography teacher (Maria Miller) who dedicated a lot of her time and energy into fostering a respect of the environment and conservation into her students, as well as the wider community.                                                                                                                                                                                                                                                                                                                                                                                                                                                                                                                                                                                                               |

 = Winner  
 = Runner-Up  
 = Contributor  
 = Finalist  
 = Semi-Finalist  
 = Special Recognition  
 = Science & Research Award  
 = Creativity Award  
 = Inspiring Conservation Award  
 = Junior Scientist Award (12 & under)

## Species Naming Competition Full List of Entries

|     |                                                                                                                                                                                                                                                                                                                                                                                                                                                                                                                                                                                                                                                                                                                                                                                                                                                                                                                                                                                                                                                                                                         |
|-----|---------------------------------------------------------------------------------------------------------------------------------------------------------------------------------------------------------------------------------------------------------------------------------------------------------------------------------------------------------------------------------------------------------------------------------------------------------------------------------------------------------------------------------------------------------------------------------------------------------------------------------------------------------------------------------------------------------------------------------------------------------------------------------------------------------------------------------------------------------------------------------------------------------------------------------------------------------------------------------------------------------------------------------------------------------------------------------------------------------|
| 468 | <b>Lime Frog</b> <i>Anura Cinis</i>   Nicholas Tourville, 26, US                                                                                                                                                                                                                                                                                                                                                                                                                                                                                                                                                                                                                                                                                                                                                                                                                                                                                                                                                                                                                                        |
|     | The frogs have limeskin-like texture and coloration (at different points of ripeness between the male and female)                                                                                                                                                                                                                                                                                                                                                                                                                                                                                                                                                                                                                                                                                                                                                                                                                                                                                                                                                                                       |
| 469 | <b>Green Slime Chirping Frog</b> <i>Viridi Limus Minurritio ranae</i>   Nicolas - Roxana Franco, 10, USA ●                                                                                                                                                                                                                                                                                                                                                                                                                                                                                                                                                                                                                                                                                                                                                                                                                                                                                                                                                                                              |
|     | The sound recording the frog sound like a chirping sound and the color looked green and slimy                                                                                                                                                                                                                                                                                                                                                                                                                                                                                                                                                                                                                                                                                                                                                                                                                                                                                                                                                                                                           |
| 470 | <b>Sticky Jones</b> <i>Hylocirtus viscosi</i>   Nicole Obando, 14, Ecuador ●                                                                                                                                                                                                                                                                                                                                                                                                                                                                                                                                                                                                                                                                                                                                                                                                                                                                                                                                                                                                                            |
|     | Yo escogí el nombre de “Sticky Jones” para la nueva ranita, ya que principalmente me hace acuerdo a un detective marciano, llamado J’onn J’onzz, de mi serie preferida, “Supergirl”. Este detective viene de Marte y se relaciona mucho con la nueva especie de rana, principalmente porque tiene la capacidad de ocultar su identidad de marciano, viéndose como un humano común y corriente, para que de esta manera no lo vean raro ni lo vayan a matar, lo que me recuerda a que esta rana puede camuflarse y así evitar que sus depredadores la coman, además que no es muy conocida, ya que es una nueva especie. En otro aspecto en lo que esta nueva especie de rana se relaciona con este personaje de ficción, es en los ojos y en su piel de color verde, ya que esta rana tiene ojos cafés muy brillantes y piel de color verde. Finalmente, esta rana tiene la capacidad de adherirse a las hojas, lo cual es una gran ventaja para ella, ya que de esta manera no se cae ni se resbala, igualmente J’onn J’onzz también puede hacer cosas con sus manos, como por ejemplo abrir portales. |
| 471 | <b>Cloud dweller</b> <i>Nubes Civis</i>   Nicole Cranham, 17, UK ●                                                                                                                                                                                                                                                                                                                                                                                                                                                                                                                                                                                                                                                                                                                                                                                                                                                                                                                                                                                                                                      |
|     | I have chosen my name based off of the climate of its habitat, Chocó and Tropical Andes. So many frog species have been named after their physical characteristics or their location I believe it would be more interesting to name it after the climate it lives in. As for why I am submitting in the first place, I’ve always had a huge interest in biology and getting the opportunity to name a species is incredible. Also I love frogs.                                                                                                                                                                                                                                                                                                                                                                                                                                                                                                                                                                                                                                                         |
| 472 | <b>Zaba</b>   Nicole Bergeon, 19, USA                                                                                                                                                                                                                                                                                                                                                                                                                                                                                                                                                                                                                                                                                                                                                                                                                                                                                                                                                                                                                                                                   |
|     | Zaba means frog in Polish.                                                                                                                                                                                                                                                                                                                                                                                                                                                                                                                                                                                                                                                                                                                                                                                                                                                                                                                                                                                                                                                                              |
| 473 | <b>Rana arbórea puntuluz</b>   Nina Guayasamin, 7, Ecuador ● ● ●                                                                                                                                                                                                                                                                                                                                                                                                                                                                                                                                                                                                                                                                                                                                                                                                                                                                                                                                                                                                                                        |
|     | Mi hija Nina (de 7 años) escogió este nombre porque tanto el ojo como la espalda tienen puntitos luminosos. Además, la luz relleja esperanza.                                                                                                                                                                                                                                                                                                                                                                                                                                                                                                                                                                                                                                                                                                                                                                                                                                                                                                                                                           |
| 474 | <b>Safnet Paneah</b> <i>Hyloscirtus Paneasis</i>   Nindi Namuhaha, 15, USA                                                                                                                                                                                                                                                                                                                                                                                                                                                                                                                                                                                                                                                                                                                                                                                                                                                                                                                                                                                                                              |
|     | I chose this name because I love the way this frog is really one of a kind it can stick to surfaces other frog species cant, Which is the same case to that name which is actually my nickname and my mother told me that when I was a 2-year-old kid I did things which were actually and totally out of my age group.                                                                                                                                                                                                                                                                                                                                                                                                                                                                                                                                                                                                                                                                                                                                                                                 |
| 475 | <b>Gurb</b> <i>Hylocirtus Ferrugine</i>   Nine de Waal, 13, Netherlands                                                                                                                                                                                                                                                                                                                                                                                                                                                                                                                                                                                                                                                                                                                                                                                                                                                                                                                                                                                                                                 |
|     | I chose the name, because a gurb is a very awesome frog I made up and it would be really cool if there would really be a species of frog that’s called gurb. It would be like a dream coming true. I really love frogs, but if there would be a frog species named Gurb, it would be super duper amazing. I also think gurb sounds really cool and it’s an easy name to remember. It would be really great if this name will be the new name for these frogs!                                                                                                                                                                                                                                                                                                                                                                                                                                                                                                                                                                                                                                           |
| 476 | <b>Camollugri</b>   Nissa (Bancroft ES) Cea, 10, USA ●                                                                                                                                                                                                                                                                                                                                                                                                                                                                                                                                                                                                                                                                                                                                                                                                                                                                                                                                                                                                                                                  |
|     | Elegí este nombre por “Camo” por camuflaje, “llu” por lluvia y “gri” por el sonido que hace, como el de un grillo.                                                                                                                                                                                                                                                                                                                                                                                                                                                                                                                                                                                                                                                                                                                                                                                                                                                                                                                                                                                      |
| 477 | <b>Birog</b>   No Thanks, 16, Luxembourg                                                                                                                                                                                                                                                                                                                                                                                                                                                                                                                                                                                                                                                                                                                                                                                                                                                                                                                                                                                                                                                                |
|     | I am sure that because the frog sounds like a bird but is simultaneously a frog it should be called “Birog.” This is the word Bird and frog combined. Because of the nature of humans appreciation of humour is science this would be a very fitting name.                                                                                                                                                                                                                                                                                                                                                                                                                                                                                                                                                                                                                                                                                                                                                                                                                                              |
| 478 | <b>Choco hero frog</b>   Noa DOSAJ, 8, India ●                                                                                                                                                                                                                                                                                                                                                                                                                                                                                                                                                                                                                                                                                                                                                                                                                                                                                                                                                                                                                                                          |
|     | Because it can camouflage like a super hero                                                                                                                                                                                                                                                                                                                                                                                                                                                                                                                                                                                                                                                                                                                                                                                                                                                                                                                                                                                                                                                             |
| 479 | <b>Lake Frog</b>   Nolan Rodgers, 7, USA ●                                                                                                                                                                                                                                                                                                                                                                                                                                                                                                                                                                                                                                                                                                                                                                                                                                                                                                                                                                                                                                                              |
|     | It looks like it lives next to a lake and it’s a frog.                                                                                                                                                                                                                                                                                                                                                                                                                                                                                                                                                                                                                                                                                                                                                                                                                                                                                                                                                                                                                                                  |
| 480 | <b>Choco Sprinkled Frog</b> <i>Hylocirtus scelerisque sprinkli</i>   Nolan & Cameron Pilavsky, 7, USA ● ●                                                                                                                                                                                                                                                                                                                                                                                                                                                                                                                                                                                                                                                                                                                                                                                                                                                                                                                                                                                               |
|     | The frog comes from the Choco rainforest but also looks like it is covered in tiny chocolate sprinkles!                                                                                                                                                                                                                                                                                                                                                                                                                                                                                                                                                                                                                                                                                                                                                                                                                                                                                                                                                                                                 |

 = Winner  
 = Runner-Up  
 = Contributor  
 = Finalist  
 = Semi-Finalist  
 = Special Recognition  
 = Science & Research Award  
 = Creativity Award  
 = Inspiring Conservation Award  
 = Junior Scientist Award (12 & under)

## Species Naming Competition Full List of Entries

|     |                                                                                                                                                                                                                                                                                                                                                                                                                                                                                                                                                                                                                                                                                                                                                                                    |
|-----|------------------------------------------------------------------------------------------------------------------------------------------------------------------------------------------------------------------------------------------------------------------------------------------------------------------------------------------------------------------------------------------------------------------------------------------------------------------------------------------------------------------------------------------------------------------------------------------------------------------------------------------------------------------------------------------------------------------------------------------------------------------------------------|
| 481 | <b>Dew-Spotted Glass Frog</b> <i>Hylocirtus lacus</i>   Nora Doichev, 15, USA                                                                                                                                                                                                                                                                                                                                                                                                                                                                                                                                    |
|     | It shines through like dew, and is covered in spots like hundreds of tiny water droplets. It is most physically recognizable as a glass frog, so I decided to name it as such. And then “lacus” in Latin means water or a body of water, so a dew covered frog who is in relation to water                                                                                                                                                                                                                                                                                                                                                                                                                                                                                         |
| 482 | <b>Mols</b> <i>Molsamorphius</i>   Norah Culver, 11, USA                                                                                                                                                                                                                                                                                                                                                                                                                                                                                                                                                                                                                                                                                                                           |
|     | It was after one of my friends that I played softball with. Plus it just sounds weird but cool at the same time, which is perfect for a frog name.                                                                                                                                                                                                                                                                                                                                                                                                                                                                                                                                                                                                                                 |
| 483 | <b>The Royal Maldonian Torrentfrog</b>   Nyokabi Kirubi, 18, Kenya                                                                                                                                                                                                                                                                                                                                                                                                                                                                                                                                                                                                                                |
|     | The name is a reference to the Disney fictional prince, Prince Naveen who comes from the fictional country of Maldonia. Prince Naveen is cursed by a voodoo witchdoctor and turns into a frog. I think the name is suitable for this gorgeous, adorable, newly-discovered frog.                                                                                                                                                                                                                                                                                                                                                                                                                                                                                                    |
| 484 | <b>Round finger-tipped torrent frog</b> <i>Hyloscirtus nigrundo</i>   Nyokabi Ng'ang'a, 20, Kenya                                                                                                                                                                                                                                                                                                                                                                                                                                                                                                            |
|     | I chose the common name as Round finger tipped torrent frog to bring to the attention, the distinct nature of the fingertips of this beautiful new frog specie. For the specific epithet, in the scientific name, I chose nigrundo, which comes from two Latin words: nigreos (black) & hirundo (swallow). My inspiration to go by these two words, came from the two mountains (black & swallow) mountains where the area in which the frog was found, is situated. To me, these mountains carry weight in their appellations & moreover, with it being that both are active volcanic mountains, based on google research, it is surprising, yet acceptable, to see how a new specie of frogs can emerge in an area where their existence can be threatened by volcanic activity. |
| 485 | <b>wet cloud frog</b>   Oakley Sipe, 11, Canada                                                                                                                                                                                                                                                                                                                                                                                                                                                                                                                                                                  |
|     | This frog lives in a cloud forest with water, right?                                                                                                                                                                                                                                                                                                                                                                                                                                                                                                                                                                                                                                                                                                                               |
| 486 | <b>Octavio</b> <i>Hylocirtus octavius</i>   Octavio Westwood, 14, USA                                                                                                                                                                                                                                                                                                                                                                                                                                                                                                                                                                                                                                                                                                              |
|     | Because Octavio is my name and I want this frog to represent me.                                                                                                                                                                                                                                                                                                                                                                                                                                                                                                                                                                                                                                                                                                                   |
| 487 | <b>Gherkin Frog</b> <i>Hylocirtus Conditaneus</i>   Oliver Starling, 23, United Kingdom                                                                                                                                                                                                                                                                                                                                                                                                                                                                                                                                                                                                                                                                                            |
|     | The frogs green tone reminded me of a gherkin (pickled cucumber) and it's colour changing skin reminded me of the transformation from cucumber to gherkin, from a more verdant, lush green to a murkier, dirty green.                                                                                                                                                                                                                                                                                                                                                                                                                                                                                                                                                              |
| 488 | <b>Tulcán Cryptic Colored Frog</b> <i>Hyloscirtus Dissimulato</i>   Olivia Rassel, 22, USA                                                                                                                                                                                                                                                                                                                                                                                                                                                                                                                                                                                                                                                                                         |
|     | Common name- because it is specific to its origin and highlights the fact that it is camouflaged Scientific- dissimulato comes from the Latin word for disguised                                                                                                                                                                                                                                                                                                                                                                                                                                                                                                                                                                                                                   |
| 489 | <b>Green mouth</b> <i>nivea</i>   Onat Yıldızaydın, 15, Turkey                                                                                                                                                                                                                                                                                                                                                                                                                                                                                                                                                                                                                                                                                                                     |
|     | I said green mouth to common name because in the images even though the frogs change their color the mouth part is always green. The reason for the “Nivea” is my favorite cobra species is naja nivea.                                                                                                                                                                                                                                                                                                                                                                                                                                                                                                                                                                            |
| 490 | <b>Red Spotter Frog</b> <i>Redus Spottus</i>   Owen Graves, 19, USA                                                                                                                                                                                                                                                                                                                                                                                                                                                                                                                                                                                                                                                                                                                |
|     | It sounds cool and it has red spots                                                                                                                                                                                                                                                                                                                                                                                                                                                                                                                                                                                                                                                                                                                                                |
| 491 | <b>Juicy Pear Frog</b> <i>juicipearus</i>   Parker Conquest, 21, USA                                                                                                                                                                                                                                                                                                                                                                                                                                                                                                                                                                                                                                                                                                               |
|     | The frog looks exactly like a juicy pear Jelly Bear.                                                                                                                                                                                                                                                                                                                                                                                                                                                                                                                                                                                                                                                                                                                               |
| 492 | <b>The Green Jelly Torrenteer Frog</b> <i>Hyloscirtus jaleaverdeae</i>   Parsa Nayyara, 16, Indonesia                                                                                                                                                                                                                                                                                                                                                                                                                                                                                                    |
|     | Hyloscirtus jaleaverdeae, derived from the Spanish word ‘Jalea Verde’ (‘Green Jelly’ in English), reflects the frog’s greenish translucent skin which appears similar to a green Jell-O. The spanish word ‘Jalea Verde’ was chosen instead of ‘Green Jelly’ to represent the culture and language of the people of Ecuador.                                                                                                                                                                                                                                                                                                                                                                                                                                                        |
| 493 | <b>Carchi Torrent Frog</b> <i>juventudae</i>   Paul Stouffer, 21, USA                                                                                                                                                                                                                                                                                                                                                                                                                                                     |
|     | This whole project is about the next generation and how we are learning, teaching, and empowering ourselves to save the planet. This would be a small but powerful reminder as to what young people can accomplish. Power to the youth!                                                                                                                                                                                                                                                                                                                                                                                                                                                                                                                                            |

 = Winner  
 = Runner-Up  
 = Contributor  
 = Finalist  
 = Semi-Finalist  
 = Special Recognition  
 = Science & Research Award  
 = Creativity Award  
 = Inspiring Conservation Award  
 = Junior Scientist Award (12 & under)

## Species Naming Competition Full List of Entries

|     |                                                                                                                                                                                                                                                                                                                                                                                                                                                                                                                                                                                                                                                                                                                                                                                                                                                             |
|-----|-------------------------------------------------------------------------------------------------------------------------------------------------------------------------------------------------------------------------------------------------------------------------------------------------------------------------------------------------------------------------------------------------------------------------------------------------------------------------------------------------------------------------------------------------------------------------------------------------------------------------------------------------------------------------------------------------------------------------------------------------------------------------------------------------------------------------------------------------------------|
| 494 | <b>Rana con dedos de chelista</b> <i>Hylocirtus viscosi aequatoria</i>   Paula Benavides, 14, Ecuador                                                                                                                                                                                                                                                                                                                                                                                                                                                                                                                                                                                                                                                                                                                                                       |
|     | Elegí ese nombre, ya que algo muy característico de esta ranita es la forma redonda de la yema de sus dedos y por lo general los músicos que practican instrumentos como el chelo y el contrabajo, tienen las yemas de sus dedos al igual que esta ranita, de forma redonda debido a la presión que aplican al tocar las cuerdas. El nombre científico lo elegí ya que gracias a sus patas viscosas es capaz de adherirse a diferentes superficies húmedas del bosque y debido a que habita en Ecuador.                                                                                                                                                                                                                                                                                                                                                     |
| 495 | <b>Ecuador Fire Frog</b>   Peyton Gladfelter, 8, USA                                                                                                                                                                                                                                                                                                                                                                                                                                                                                                                                                                                                                                                                                                                       |
|     | I chose this name because it lives in Ecuador.                                                                                                                                                                                                                                                                                                                                                                                                                                                                                                                                                                                                                                                                                                                                                                                                              |
| 496 | <b>Chocó freckled torrent frog</b> <i>Hylocirtus spargerecacao</i>   Pia Kreže, 15, Slovenia                                                                                                                                                                                                                                                                                                                                                                                                                                                                                                                                                                                                                                                                             |
|     | Because it was found in Chocó and Chocó also reminds of chocolate. It has chocolate freckles that look like sprinkled cacao.                                                                                                                                                                                                                                                                                                                                                                                                                                                                                                                                                                                                                                                                                                                                |
| 497 | <b>Great Ecuadorian torrent frog</b>   Prit Patel, 14, Kenya                                                                                                                                                                                                                                                                                                                                                                                                                                                                                                                                                                                                                                                                                                               |
|     | The frog is found in Ecuador hence Ecuadorian and it is a torrent frog. Also the great just makes it sound better                                                                                                                                                                                                                                                                                                                                                                                                                                                                                                                                                                                                                                                                                                                                           |
| 498 | <b>Frog lives matter</b>   Quentyn Ledron, 17, France                                                                                                                                                                                                                                                                                                                                                                                                                                                                                                                                                                                                                                                                                                                                                                                                       |
|     | The movement Black Lives Matter is very actual and important, so I wanted to make sure that the person will remember the fight, but not only for that. For all the biodiversity that will disappear with global warming, we need to send a message of hope on the earth                                                                                                                                                                                                                                                                                                                                                                                                                                                                                                                                                                                     |
| 499 | <b>Green Ecuator-torrent frog</b> <i>Viridi aequinoctiali-torrentem ranae</i>   Rafael Ochoa, 10, USA                                                                                                                                                                                                                                                                                                                                                                                                                                                                                                                                                                                 |
|     | I chose this name because I looked at where he was found and what he is related to he looks green so I put green in the begging                                                                                                                                                                                                                                                                                                                                                                                                                                                                                                                                                                                                                                                                                                                             |
| 500 | <b>camofrog</b>   Rafael Lora, 10, USA                                                                                                                                                                                                                                                                                                                                                                                                                                                                                                                                                                                                                                                                                                                                     |
|     | Mi rana se llama: camofrog Elegí ese nombre porque: en un foto los puntos que el tenía se citaron un pocito y los machos también las embras camuflog.                                                                                                                                                                                                                                                                                                                                                                                                                                                                                                                                                                                                                                                                                                       |
| 501 | <b>Awá Chameleon Frog</b> <i>Hylocirtus thunbergus</i>   Rafael dos Santos Martins, 20, Portugal                                                                                                                                                                                                                                                                                                                                                                                                                                                                                                                                                                                                                                                                                                                                                            |
|     | The common name pays tribute to the indigenous tribe that shares the rainforest area that is occupied by this species of frog. It is also a reference to the ability of these frogs to change the colors of their skins depending on the environmental conditions, just as the chameleons are known to do. The specific epithet distinguishes the work that has been done by the climate activist Greta Thunberg to help saving our planet and natural world.                                                                                                                                                                                                                                                                                                                                                                                               |
| 502 | <b>The Rounded Ribbit</b>   Rebecca Walker, 18, Ireland                                                                                                                                                                                                                                                                                                                                                                                                                                                                                                                                                                                                                                                                                                                                                                                                     |
|     | I chose to name this species the “Rounded Ribbit” for three reasons. The first part of the name makes it clear which species of frog you’re referring to and avoids confusion between other species. I think the word “rounded” is essential to include, as its noticeably rounded fingertips help to distinguish this frog from other types. The second half of the name refers to the accepted sound for a frog in English. Even though most frogs don’t actually say “ribbit”, it makes the name humorous and obvious that this species is a frog. Everyone will know what you’re talking about! Lastly, my name idea features alliteration. The repeated “r” makes the name fun to say out loud and easy to remember! I chose to call this beautiful new species of frog the “Rounded Ribbit” as it is fun, relevant to the frog, unique and memorable! |
| 503 | <b>Lombard</b>   Regan Standlick, 26, USA                                                                                                                                                                                                                                                                                                                                                                                                                                                                                                                                                                                                                                                                                                                                                                                                                   |
|     | It just felt like it fit.                                                                                                                                                                                                                                                                                                                                                                                                                                                                                                                                                                                                                                                                                                                                                                                                                                   |
| 504 | <b>Tulcán torrent frog</b> <i>Hyloscirtus cuarentanus</i>   Rhiana Angelita Parr, 21, Philippines                                                                                                                                                                                                                                                                                                                                                                                                                                                                                            |
|     | Even if most people all over the world have to remain at home because of the pandemic, it’s comforting to know that new discoveries are still being made everyday - like this new species of torrent frog! For its common name, I went with its county of origin to pay homage to the biodiversity within the area. However, given its striking looks, I thought this species deserved a memorable scientific name that will remind us of a very unique time in all our lives. I based it off of the Spanish word for quarantine - “cuarentana.” My country, the Philippines, has been under mandatory community quarantine since March but I’m grateful for opportunities like this that allow me to feel the excitement of new species discoveries from the other side of the world.                                                                      |

 = Winner  
 = Runner-Up  
 = Contributor  
 = Finalist  
 = Semi-Finalist  
 = Special Recognition  
 = Science & Research Award  
 = Creativity Award  
 = Inspiring Conservation Award  
 = Junior Scientist Award (12 & under)

## Species Naming Competition Full List of Entries

|                                                                                                                                                                                                                                                                                                                                                                                                                                                                                                                                                                                                                                                                                                                                                                                                                                                                                                                                                                                                                                                                                                                                                                                                                                                                                                                                                                                                                                                                                                                                                                                                                                                                                                                                                                                                                                                                              |                                                                                                                                                                                                                    |
|------------------------------------------------------------------------------------------------------------------------------------------------------------------------------------------------------------------------------------------------------------------------------------------------------------------------------------------------------------------------------------------------------------------------------------------------------------------------------------------------------------------------------------------------------------------------------------------------------------------------------------------------------------------------------------------------------------------------------------------------------------------------------------------------------------------------------------------------------------------------------------------------------------------------------------------------------------------------------------------------------------------------------------------------------------------------------------------------------------------------------------------------------------------------------------------------------------------------------------------------------------------------------------------------------------------------------------------------------------------------------------------------------------------------------------------------------------------------------------------------------------------------------------------------------------------------------------------------------------------------------------------------------------------------------------------------------------------------------------------------------------------------------------------------------------------------------------------------------------------------------|--------------------------------------------------------------------------------------------------------------------------------------------------------------------------------------------------------------------|
| 505                                                                                                                                                                                                                                                                                                                                                                                                                                                                                                                                                                                                                                                                                                                                                                                                                                                                                                                                                                                                                                                                                                                                                                                                                                                                                                                                                                                                                                                                                                                                                                                                                                                                                                                                                                                                                                                                          | <b>Ameri Frog</b> <i>Peruviae auriferae re ranamani</i>   Riley Rea, 13, Canada                                                   |
| I chose the name Ameri Frog, since it's a subtle name and not hard to pronounce. It is pronounced as AH-MERRY, and it means "Promise from god". In Arabic, it also means "Strength" which is also very nice, as it shows strength in the name obviously! I have wanted to go to Ecuador since last year as well, so it's really cool I get to enter a contest for naming a frog in that country! Ecuador is also the tallest place in the world! It's even taller than Mount Everest, meaning it would also be the closest place to space on the globe! I personally like the look of the frog, the male almost looks clear! I heard that the forest it's living in is very moist, yet it's a dry feeling of moistness. I have a very high love for animals and always have, so I want to help this species survive and get itself a name! Hope this helps choose a name! That's really all I have to say about the new frog species, and why I think it should be called the Ameri Frog!                                                                                                                                                                                                                                                                                                                                                                                                                                                                                                                                                                                                                                                                                                                                                                                                                                                                                    |                                                                                                                                                                                                                    |
| 506                                                                                                                                                                                                                                                                                                                                                                                                                                                                                                                                                                                                                                                                                                                                                                                                                                                                                                                                                                                                                                                                                                                                                                                                                                                                                                                                                                                                                                                                                                                                                                                                                                                                                                                                                                                                                                                                          | <b>acfricon lion</b> <i>bhathy frog</i>   rishika Halwaisya, 26, india                                                                                                                                             |
| because I think it suits the frog                                                                                                                                                                                                                                                                                                                                                                                                                                                                                                                                                                                                                                                                                                                                                                                                                                                                                                                                                                                                                                                                                                                                                                                                                                                                                                                                                                                                                                                                                                                                                                                                                                                                                                                                                                                                                                            |                                                                                                                                                                                                                    |
| 507                                                                                                                                                                                                                                                                                                                                                                                                                                                                                                                                                                                                                                                                                                                                                                                                                                                                                                                                                                                                                                                                                                                                                                                                                                                                                                                                                                                                                                                                                                                                                                                                                                                                                                                                                                                                                                                                          | <b>saltarina</b>   Robert Garcia, 11, Estados Unidos                                                                              |
| Mi rana se llama saltarina Elegí ese nombre porque la rana le gusta brincar                                                                                                                                                                                                                                                                                                                                                                                                                                                                                                                                                                                                                                                                                                                                                                                                                                                                                                                                                                                                                                                                                                                                                                                                                                                                                                                                                                                                                                                                                                                                                                                                                                                                                                                                                                                                  |                                                                                                                                                                                                                    |
| 508                                                                                                                                                                                                                                                                                                                                                                                                                                                                                                                                                                                                                                                                                                                                                                                                                                                                                                                                                                                                                                                                                                                                                                                                                                                                                                                                                                                                                                                                                                                                                                                                                                                                                                                                                                                                                                                                          | <b>The Camouflaged Soldier Andequadorian Frog</b> <i>Hyloscortis captiosus</i>   Roberto Piantini Reid, 16, Dominican Republic  |
| The Camouflaged Soldier Andequadorian Frog Because this new species of frog has been discovered in Ecuador, and its habitat is along with the hydrography of the Andean mountains of the area, it is fair that the frog's common name exhibits its location of discovery. It would be an honor for the frog to possess a mix of the locations in which he lives in. The name Andequadorian, a mixture of the Andes and Equador, goes so well together that it sounds like an existing word. It sounds extremely apathetic. In addition, this new species has skin that acts as camouflage. It has green skin with brown and yellow spots that are lost with the greenery that surrounds it. This frog's skin color also alters as a result of changes in the environment around it. His camouflaged characteristics led me to include in the frog's name "Camouflaged Soldier" because like a soldier during the battle they often camouflage to get lost in the scenes. Scientific Name: <i>Hyloscortis captiosus</i> When humans began to adopt last names, it was largely given to them by their profession. For example, the last name Baker could have been given to a person because he/she specialized in baking. That being said, I because the frog does not have a profession, but they do lay the eggs on leaves that are on top of the water so that the tadpoles fall straight into it, I decided to give this species the scientific name of <i>Hyloscortis captiosus</i> . The <i>Hyloscortis</i> is the designated initial name for the frog, but <i>captiosus</i> in Latin means smart. They are intelligent for laying their eggs on top of leaves that will lead them to fall directly into the water, it is a smart and effective move, so I believe it is appropriate that the frog contain the word that describes him, smart, in his scientific name. |                                                                                                                                                                                                                    |
| 509                                                                                                                                                                                                                                                                                                                                                                                                                                                                                                                                                                                                                                                                                                                                                                                                                                                                                                                                                                                                                                                                                                                                                                                                                                                                                                                                                                                                                                                                                                                                                                                                                                                                                                                                                                                                                                                                          | <b>Froggy</b> <i>Anura Aequatoriana</i>   Romina Chiriboga, 14, Ecuador                                                                                                                                            |
| Yo le puse froggy porque cuando era pequeña tenía un peluche de rana que se llamaba así. Su nombre científico lo puse Anura Aequatoriana ya que el nombre científico real de las ranas es Anura y quise agregarle Aequatoriana porque fue encontrada en territorio ecuatoriano.                                                                                                                                                                                                                                                                                                                                                                                                                                                                                                                                                                                                                                                                                                                                                                                                                                                                                                                                                                                                                                                                                                                                                                                                                                                                                                                                                                                                                                                                                                                                                                                              |                                                                                                                                                                                                                    |
| 510                                                                                                                                                                                                                                                                                                                                                                                                                                                                                                                                                                                                                                                                                                                                                                                                                                                                                                                                                                                                                                                                                                                                                                                                                                                                                                                                                                                                                                                                                                                                                                                                                                                                                                                                                                                                                                                                          | <b>Arlene</b> <i>anura arlena</i>   Romola Goldfarb, 15, United Kingdom                                                         |
| I chose this name after my late grandmother, who absolutely loved frogs! She collected many frog things, and when I was born the first gift she ever gave me was an embroidered frog pillow. She died when I was much too young to remember her, but whenever I see frogs I think of her! She was incredibly kind and funny, and I truly wish I could've known her better. Though this name isn't very professional, I can only imagine how much she would've loved to have a real life frog named after her.                                                                                                                                                                                                                                                                                                                                                                                                                                                                                                                                                                                                                                                                                                                                                                                                                                                                                                                                                                                                                                                                                                                                                                                                                                                                                                                                                                |                                                                                                                                                                                                                    |
| 511                                                                                                                                                                                                                                                                                                                                                                                                                                                                                                                                                                                                                                                                                                                                                                                                                                                                                                                                                                                                                                                                                                                                                                                                                                                                                                                                                                                                                                                                                                                                                                                                                                                                                                                                                                                                                                                                          | <b>Ecuadorian sticky boy</b> <i>Anura chroma</i>   Ronnie Baldock, 14, North America                                                                                                                               |
| I chose the scientific name because the frog changes color. I chose the common name because the frog has sticky skin and can stick to wet surfaces.                                                                                                                                                                                                                                                                                                                                                                                                                                                                                                                                                                                                                                                                                                                                                                                                                                                                                                                                                                                                                                                                                                                                                                                                                                                                                                                                                                                                                                                                                                                                                                                                                                                                                                                          |                                                                                                                                                                                                                    |
| 512                                                                                                                                                                                                                                                                                                                                                                                                                                                                                                                                                                                                                                                                                                                                                                                                                                                                                                                                                                                                                                                                                                                                                                                                                                                                                                                                                                                                                                                                                                                                                                                                                                                                                                                                                                                                                                                                          | <b>Speckled Carchi</b> <i>maculatus</i>   Rowan Taylor, 17, England                                                             |
| The majority of species in the <i>Hyloscirtus</i> genus are named after the province they were discovered in, which I think helps researchers in the field. However, the frog's beautiful red spots shouldn't be ignored as they remind people of its impressive colour changing ability. Naming it 'speckled', which is a better description of the colouration helps differentiate it from other frogs with 'spotted' in their names. Thank you!                                                                                                                                                                                                                                                                                                                                                                                                                                                                                                                                                                                                                                                                                                                                                                                                                                                                                                                                                                                                                                                                                                                                                                                                                                                                                                                                                                                                                           |                                                                                                                                                                                                                    |

 = Winner  
 = Runner-Up  
 = Contributor  
 = Finalist  
 = Semi-Finalist  
 = Special Recognition  
 = Science & Research Award  
 = Creativity Award  
 = Inspiring Conservation Award  
 = Junior Scientist Award (12 & under)



## Species Naming Competition Full List of Entries

|     |                                                                                                                                                                                                                                                                                                                                                                                                                                                                                                                                                                               |
|-----|-------------------------------------------------------------------------------------------------------------------------------------------------------------------------------------------------------------------------------------------------------------------------------------------------------------------------------------------------------------------------------------------------------------------------------------------------------------------------------------------------------------------------------------------------------------------------------|
| 513 | <b>The Freckled Chical Torrent Frog</b> <i>Maculosus Amnis</i>   Ruby Tomlinson, 15, Canadian/English ●●                                                                                                                                                                                                                                                                                                                                                                                                                                                                      |
|     | I chose the common name because one of its primary features is its spots/freckles and it was found near El Chical, I also wanted it to have its general species name the torrent frog so that, like the red spotted glass frog it has some general descriptions and its general species that it is a part of. I then chose the Latin name which in English means “spotted stream” because of its spots and its habitat. I also think these words go nicely together and it isn’t too long or too difficult to say which i understand sometimes becomes an obstacle at school. |
| 514 | <b>Treacle</b>   Ruth Moore, 14, England                                                                                                                                                                                                                                                                                                                                                                                                                                                                                                                                      |
|     | I choose this name because the frog has rounded sticky fingertips just like treacle gives you sticky fingertips.                                                                                                                                                                                                                                                                                                                                                                                                                                                              |
| 515 | <b>brown speckled leaf frog</b> <i>brunneis folium Rana colore respersa</i>   Ryan Higuchi, 11, Canada ●                                                                                                                                                                                                                                                                                                                                                                                                                                                                      |
|     | Because it has a brown polkka dots and it is on a leaf                                                                                                                                                                                                                                                                                                                                                                                                                                                                                                                        |
| 516 | <b>Choco Choco</b> <i>Ranae e marmore luscus</i>   Ryan Roberts, 15, Canada                                                                                                                                                                                                                                                                                                                                                                                                                                                                                                   |
|     | Ranae e marmore luscus means marble eyed frog I called it that because it looks like it has marble eyes I called it Choco Choco because it’s habitat is in the Choco cloud forest                                                                                                                                                                                                                                                                                                                                                                                             |
| 517 | <b>Osouji</b> <i>Rana Osoujius</i>   Ryan DiStefano, 15, USA                                                                                                                                                                                                                                                                                                                                                                                                                                                                                                                  |
|     | I I like okeri chibi robot happy Richie Osouji                                                                                                                                                                                                                                                                                                                                                                                                                                                                                                                                |
| 518 | <b>Cinnamon dust torrent frog</b>   Ryder Unsworth, 16, USA ●                                                                                                                                                                                                                                                                                                                                                                                                                                                                                                                 |
|     | The males of the species have small brownish spots all over that resemble what I would imagine as small pieces of cinnamon                                                                                                                                                                                                                                                                                                                                                                                                                                                    |
| 519 | <b>Ecuador Frog</b>   Rylee Hatley, 8, USA ●                                                                                                                                                                                                                                                                                                                                                                                                                                                                                                                                  |
|     | I chose this name because it lives in Ecuador. I added an (a) so it is more like a name for a pet or a person.                                                                                                                                                                                                                                                                                                                                                                                                                                                                |
| 520 | <b>circle toed tropical frogs</b> <i>circulus consueverat adinstar recedent ranae a tropicae</i>   Sabella Osborn, 10, USA ●                                                                                                                                                                                                                                                                                                                                                                                                                                                  |
|     | I choose this name because the frog species has (1) circle toes (2) it lives in the Tropical Andes (3) because they are frogs. So all of thoes reasons relate to my name idea. Hope you like it.                                                                                                                                                                                                                                                                                                                                                                              |
| 521 | <b>Heqet Greg</b>   Sally Brown, 13, UK                                                                                                                                                                                                                                                                                                                                                                                                                                                                                                                                       |
|     | The name ‘Heqet’ is the name of the Egyptian god Of frogs and the frog in the reference photo looked like it was called Greg.                                                                                                                                                                                                                                                                                                                                                                                                                                                 |
| 522 | <b>Apple Frog</b> <i>Viridis Puer</i>   Sam Hollis, 13, England                                                                                                                                                                                                                                                                                                                                                                                                                                                                                                               |
|     | I chose the common name because the colour of the female instantly reminded me of a green apple and I chose the Latin name because it means green baby which a: sounds nice and b: describes the frog well                                                                                                                                                                                                                                                                                                                                                                    |
| 523 | <b>Rana del Chocó Chical</b> <i>Chical sponsione ranarum BISCUIT</i>   Samantha Alba, 14, Ecuador ●●                                                                                                                                                                                                                                                                                                                                                                                                                                                                          |
|     | Este nombre es en base a el lugar en donde fue encontrada esta rana y también en conjunto con el nombre del pueblo mas cercano, decidí este nombre con respecto a los lugares y me parece muy creativo y representativo el nombre que escogí                                                                                                                                                                                                                                                                                                                                  |
| 524 | <b>Circle-toed Tree Frog</b> <i>Hylocirtus bohemica</i>   Samantha Charboneau-Mudd, 15, USA                                                                                                                                                                                                                                                                                                                                                                                                                                                                                   |
|     | A close latin translation of the word Checal, like the close town, is Bohemica. The word sounds similar to bohemian and that brings to mind hippy-dippy kids who hug trees, which was kinda the start of the popular eco-movement.                                                                                                                                                                                                                                                                                                                                            |
| 525 | <b>Elizabeth Cady Stanton</b> <i>Caesar Caesar Elisabeth</i>   Samira Zuraik Zuraik, 16, Haitian                                                                                                                                                                                                                                                                                                                                                                                                                                                                              |
|     | I choose this name for my frog since Elizabeth Cady Stanton was one of the foremost women’s-rights activists and philosophers of the 19th century. It is aspirational what Elizabeth since she started a movement. She defended and fought for women all over the world and she truly inspired me as a person.                                                                                                                                                                                                                                                                |
| 526 | <b>Camuflaje Chocó</b>   Sammie Vance, 11, USA ●                                                                                                                                                                                                                                                                                                                                                                                                                                                                                                                              |
|     | I chose this name because the frog can blend in and change color with its surroundings. I liked the Spanish translation of camouflage. Also it represents the location where it is located. The name sounds good when you say it and I believe it represents it well!                                                                                                                                                                                                                                                                                                         |
| 527 | <b>Froggy McFrogface</b>   Samuel Jackson, 18, United Kingdom                                                                                                                                                                                                                                                                                                                                                                                                                                                                                                                 |
|     | As a homage to the boat Boaty McBoatface, things named like this are a bit of a running joke and it could be a way to get this little guy in the public view                                                                                                                                                                                                                                                                                                                                                                                                                  |

 = Winner  
 = Runner-Up  
 = Contributor  
 = Finalist  
 = Semi-Finalist  
 = Special Recognition  
 = Science & Research Award  
 = Creativity Award  
 = Inspiring Conservation Award  
 = Junior Scientist Award (12 & under)

## Species Naming Competition Full List of Entries

|     |                                                                                                                                                                                                                                                                                                                                                                                                                                                                                                                                                                                                                                                                                                                                                                                                                                                                                     |
|-----|-------------------------------------------------------------------------------------------------------------------------------------------------------------------------------------------------------------------------------------------------------------------------------------------------------------------------------------------------------------------------------------------------------------------------------------------------------------------------------------------------------------------------------------------------------------------------------------------------------------------------------------------------------------------------------------------------------------------------------------------------------------------------------------------------------------------------------------------------------------------------------------|
| 528 | <b>Pandemic GlassFrog</b> <i>Pandemus Hylocirtus</i>   Samuel Chiedozie, 25, Nigerian                                                                                                                                                                                                                                                                                                                                                                                                                                                                                                                                                                                                                                                                                                                                                                                               |
|     | Because this beautiful being was first discovered in this trying times of humans, I hereby name him/her the pandemic glassfrog to remind us that we pulled through together.                                                                                                                                                                                                                                                                                                                                                                                                                                                                                                                                                                                                                                                                                                        |
| 529 | <b>spotted chameleon frog</b> <i>Minilaneus</i>   Sandy Catalan, 14, USA                                                                                                                                                                                                                                                                                                                                                                                                                                                                                                                                                                                                                                                                                                                                                                                                            |
|     | I chose the common name, "Spotted Chameleon Frog" because it was just something simple. the frog is covered in spots especially the males, and they can change their skin color just like chameleons..I chose the scientific name " Unicus Minilaneus" because in Latin it means a unique mini jumper and well the frogs are small and they like to jump around and are only found in one place in the entire world which makes them unique.                                                                                                                                                                                                                                                                                                                                                                                                                                        |
| 530 | <b>Carson Green Torrent Frog</b> <i>Hyloscirtus Percculta</i>   Saskia McIntyre, 14, Australian                                                                                                                                                                                                                                                                                                                                                                                                                                                                                                                                                                                                                                                                                                  |
|     | Rachel Carson was a very influential environmental scientist, regarded by many as the founder of the modern environmental movement. She wrote many books about her findings, but by far her most popular work was "Silent Spring," in which she described the devastating effect that pesticides were having on the environment. I believe she deserves to have this new species named after her because without her activism, many species of all kinds of animals would not be alive today. I have chosen the scientific name " Hyloscirtus Percculta" because when i listened to the frog's call, I noticed it sounded like tapping or clap sticks. The Latin word " Percussoque" means "tapping" and the word "Oculta" means hidden. "Percculta" is a combination of these words, so the name of this frog may translate to something along the lines of "hidden tapping frog". |
| 531 | <b>Andhesive palette frog</b> <i>Hyloscirtus kaleidoscope</i>   Sathvika Krishnan, 19, United Kingdom                                                                                                                                                                                                                                                                                                                                                                                                                                                                                                                                                                                                                                                                                                                                                                               |
|     | Common name: Andhesive- references the Tropical Andes bioregion and is a play on words with "adhesive"- referencing the frog's sticky toe pads. Palette- references its colour changing ability (like an artist's colour mixing slab) Specific epithet: kaleidoscope- references frog's colour changing ability. Also, "kalei" sounds like "Callie" (i.e Callie Broaddus)!                                                                                                                                                                                                                                                                                                                                                                                                                                                                                                          |
| 532 | <b>Covid frog</b> <i>Covidious</i>   Savannah Mong, 15, USA                                                                                                                                                                                                                                                                                                                                                                                                                                                                                                                                                                                                                                                                                                                                                                                                                         |
|     | I feel that by giving this frog a name in reference to the current pandemic, just how "hoppy" we will be when this is all over!                                                                                                                                                                                                                                                                                                                                                                                                                                                                                                                                                                                                                                                                                                                                                     |
| 533 | <b>Tropical deceitful torrent</b>   Sayra Ramirez, 14, USA                                                                                                                                                                                                                                                                                                                                                                                                                                                                                                                                                                                                                                                                                                                                       |
|     | Because it belongs to torrent and some people might think it's a tree frog. So it's deceiving people into believing it's a tropical tree frog                                                                                                                                                                                                                                                                                                                                                                                                                                                                                                                                                                                                                                                                                                                                       |
| 534 | <b>Grip climber</b> <i>tenaci exhibit</i>   Sequoia Leger, 6, USA                                                                                                                                                                                                                                                                                                                                                                                                                                                                                                                                                                                                                                                                                                                                |
|     | Because I saw a picture of the frog climbing and I liked that one                                                                                                                                                                                                                                                                                                                                                                                                                                                                                                                                                                                                                                                                                                                                                                                                                   |
| 535 | <b>cloud forest lemon back frog</b> <i>Hyloscirtus Citrea</i>   Seth Gosher, 11, Canada                                                                                                                                                                                                                                                                                                                                                                                                                                                                                                                                                                                                                                                                                                         |
|     | because the back of the frog a has a yellow coloring and a texture of a lemon                                                                                                                                                                                                                                                                                                                                                                                                                                                                                                                                                                                                                                                                                                                                                                                                       |
| 536 | <b>Thin Spotted Corn Sprout</b>   Shauna Robson, 11, Canada                                                                                                                                                                                                                                                                                                                                                                                                                                                                                                                                                                                                                                                                                                                                      |
|     | I named it this because It is very thin and the male has a lot of spot's. The female reminds me of corn because the color of it. The male also reminds me of trees and plants so I think it reminds me of sprout's                                                                                                                                                                                                                                                                                                                                                                                                                                                                                                                                                                                                                                                                  |
| 537 | <b>Frogreen</b> <i>Frogreenic brown</i>   Sheikh Shoaib, 18, Indian                                                                                                                                                                                                                                                                                                                                                                                                                                                                                                                                                                                                                                                                                                                                                                                                                 |
|     | I choose the common name as frogreen because the frog is mostly green in colour U choose the scientific name as frogreenic brown because it can chnge its colour to brown .                                                                                                                                                                                                                                                                                                                                                                                                                                                                                                                                                                                                                                                                                                         |
| 538 | <b>Squinting Frog</b>   Shelly Rood, 17, Dominican Republic                                                                                                                                                                                                                                                                                                                                                                                                                                                                                                                                                                                                                                                                                                                                                                                                                         |
|     | I chose this name because in almost all of the pictures the frogs appear to be squinting. Even though they might just be squinting because of the light, or lack thereof, I feel that it gives them some sort of human quality. It's almost like they're judging you and it's quite funny.                                                                                                                                                                                                                                                                                                                                                                                                                                                                                                                                                                                          |
| 539 | <b>Chameleon Frog</b> <i>Hylocirtus mutatio</i>   Simeon Vonk, 15, England                                                                                                                                                                                                                                                                                                                                                                                                                                                                                                                                                                                                                                                                                                                                                                                                          |
|     | In the description it says it changes colour like a chameleon so chameleon frog and mutatio means change in latin                                                                                                                                                                                                                                                                                                                                                                                                                                                                                                                                                                                                                                                                                                                                                                   |
| 540 | <b>Cerro Torrent Frog</b> <i>Hyloscirtus convallis</i>   Simeon Barendse, 20, United Kingdom                                                                                                                                                                                                                                                                                                                                                                                                                                                                                                                                                                                                                                                                                                   |
|     | The frog's common name was inspired by the names of the two distinctive mountains in the region where the species was discovered - Cerro Negro and Cerro Golondrin. The Latin word I chose to use to complete the binomial name is "convallis" which translates as valley or ravine, referring to the physical environment that the species inhabits.                                                                                                                                                                                                                                                                                                                                                                                                                                                                                                                               |

 = Winner  
 = Runner-Up  
 = Contributor  
 = Finalist  
 = Semi-Finalist  
 = Special Recognition  
 = Science & Research Award  
 = Creativity Award  
 = Inspiring Conservation Award  
 = Junior Scientist Award (12 & under)

## Species Naming Competition Full List of Entries

|     |                                                                                                                                                                                                                                                                                                                                                                                                                                                                                                                                                                                                                                                                                                                                                                                                                                                                                                                                              |
|-----|----------------------------------------------------------------------------------------------------------------------------------------------------------------------------------------------------------------------------------------------------------------------------------------------------------------------------------------------------------------------------------------------------------------------------------------------------------------------------------------------------------------------------------------------------------------------------------------------------------------------------------------------------------------------------------------------------------------------------------------------------------------------------------------------------------------------------------------------------------------------------------------------------------------------------------------------|
| 541 | <b>Carchi Frog</b> <i>Anura carchiode</i>   Sixto Inchaustegui, 6, USA 🏆                                                                                                                                                                                                                                                                                                                                                                                                                                                                                                                                                                                                                                                                                                                                                                                                                                                                     |
|     | I choose this name because I based my knowledge and information on the place/origin where the frog was found. Having said so, Carchi, Ecuador makes a big part of what is this new frog's name because that is the place where it was found.                                                                                                                                                                                                                                                                                                                                                                                                                                                                                                                                                                                                                                                                                                 |
| 542 | <b>Freckled Slytherin</b> <i>Hylocirtus Atque Torrentium</i>   Skylar Tichenor, 14, USA 🟢                                                                                                                                                                                                                                                                                                                                                                                                                                                                                                                                                                                                                                                                                                                                                                                                                                                    |
|     | I chose <i>Hylocirtus Atque Torrentium</i> because on Google Translate it means flowing streams, and they live by streams. I chose <b>Freckled Slytherin</b> because the males have tons of freckles and the females have some and I love the Harry Potter series and Slytherin's house color is green.                                                                                                                                                                                                                                                                                                                                                                                                                                                                                                                                                                                                                                      |
| 543 | <b>La rana Kíto</b> <i>La rana Kito</i>   Sofia Torres, 10, USA 🏆                                                                                                                                                                                                                                                                                                                                                                                                                                                                                                                                                                                                                                                                                                                                                                                                                                                                            |
|     | Por que se vive en Ecuador.                                                                                                                                                                                                                                                                                                                                                                                                                                                                                                                                                                                                                                                                                                                                                                                                                                                                                                                  |
| 544 | <b>Brown speckled green frog</b> <i>Viridi Brunneis sparso vellere ranae</i>   Sofia Fernandez, 16, USA                                                                                                                                                                                                                                                                                                                                                                                                                                                                                                                                                                                                                                                                                                                                                                                                                                      |
|     | It's exactly how it looks, it's simple so most people can understand and identify it.                                                                                                                                                                                                                                                                                                                                                                                                                                                                                                                                                                                                                                                                                                                                                                                                                                                        |
| 545 | <b>Rana de torrente paraíso</b> <i>Hyloscirtus tegoelysium</i>   Sofia Montalvo, 20, Ecuador 🟢 🟡 🟠                                                                                                                                                                                                                                                                                                                                                                                                                                                                                                                                                                                                                                                                                                                                                                                                                                           |
|     | Nombre científico: El nombre <i>tegoelysium</i> (oculta en un paraíso) se compone de la unión de dos palabras en latín: "tego" que significa oculto y "elysium" que quiere decir paraíso. Escogí este nombre debido a la zona y rango de distribución en la que se encontró este anfibio. Al encontrarse en el bosque del Chocó, en una zona rodeada por montañas y en un radio de apenas 1km cuadrado, significa que este lugar debe ser realmente especial para que pueda albergar a esta ranita. Un pequeño paraíso que pasó desapercibido y hoy gracias al descubrimiento de esta nueva especie, ha sido revelado. Nombre común: Escogí este nombre porque hace referencia al hábitat en el que se encuentra, es decir, lugares con corrientes de agua. Es muy importante tener en cuenta este dato debido a que en general a la familia Hylidae se las conoce como ranas arborícolas; y bueno, paraíso, por lo explicado anteriormente. |
| 546 | <b>camouflager</b>   sophia fillier, 10, Canada 🏆                                                                                                                                                                                                                                                                                                                                                                                                                                                                                                                                                                                                                                                                                                                                                                                                                                                                                            |
|     | I chose this name because they can camouflage and it sounds cool and I really want mine to get picked                                                                                                                                                                                                                                                                                                                                                                                                                                                                                                                                                                                                                                                                                                                                                                                                                                        |
| 547 | <b>Tulcano frog</b> <i>Hyloscirtus tulcanensis</i>   Sophia Mills, 13, United States 🟢                                                                                                                                                                                                                                                                                                                                                                                                                                                                                                                                                                                                                                                                                                                                                                                                                                                       |
|     | Because this frog has a very restricted range to this county, to honor this biodiverse region of Ecuador                                                                                                                                                                                                                                                                                                                                                                                                                                                                                                                                                                                                                                                                                                                                                                                                                                     |
| 548 | <b>Ecuadorian webbed</b> <i>Ecuadorian pygmy</i>   Sophia Trout, 13, USA                                                                                                                                                                                                                                                                                                                                                                                                                                                                                                                                                                                                                                                                                                                                                                                                                                                                     |
|     | I chose this name because this frog was found in Ecuador and it is different from a glass frog because of its webbed feet so I thought why not a Ecuadorian webbed frog.                                                                                                                                                                                                                                                                                                                                                                                                                                                                                                                                                                                                                                                                                                                                                                     |
| 549 | <b>Pleather Skin</b>   Sophia Watt, 18, USA                                                                                                                                                                                                                                                                                                                                                                                                                                                                                                                                                                                                                                                                                                                                                                                                                                                                                                  |
|     | I think this name described the characteristics of a frog's skin accurately which I believe is very important in identifying a frog.                                                                                                                                                                                                                                                                                                                                                                                                                                                                                                                                                                                                                                                                                                                                                                                                         |
| 550 | <b>Chameleon cloud frog</b> <i>Hylocirtus nubes</i>   Sophie Wayne-Morris, 16, England 🟢                                                                                                                                                                                                                                                                                                                                                                                                                                                                                                                                                                                                                                                                                                                                                                                                                                                     |
|     | The frog has similar abilities to that of a chameleon, in that it can camouflage itself to match its surroundings. Also I used the word cloud to represent the cloud forest habitat they live in, which is one of the most globally threatened ecosystems.                                                                                                                                                                                                                                                                                                                                                                                                                                                                                                                                                                                                                                                                                   |
| 551 | <b>King Harold frog</b>   Sophie Leeman, 18, Australia                                                                                                                                                                                                                                                                                                                                                                                                                                                                                                                                                                                                                                                                                                                                                                                                                                                                                       |
|     | I chose this name in honour of King Harold from the movie <i>Shrek 2</i> , who selflessly sacrifices his life to save his daughter Princess Fiona. In doing so, he turned into a green frog quite like this adorable guy here. He takes it quite well and lives as a humble King frog for the rest of his days. Given this noble act and my fellow youth's love for <i>Shrek</i> movies, I believe we need him to be named King Harold so we can have this amusing pop culture reference forever. Also, it'll be pretty motivating for conservation because it's guaranteed young people will want to protect the King Harold frog.                                                                                                                                                                                                                                                                                                          |
| 552 | <b>Hypocon frog</b> <i>Hypocondreus frog</i>   Soren Niles, 15, Canada                                                                                                                                                                                                                                                                                                                                                                                                                                                                                                                                                                                                                                                                                                                                                                                                                                                                       |
|     | Sounds cool, idk                                                                                                                                                                                                                                                                                                                                                                                                                                                                                                                                                                                                                                                                                                                                                                                                                                                                                                                             |
| 553 | <b>Chocolate Cloud Frog</b> <i>Tempesta</i>   Sorrell Cowen, 21, UK 🟢                                                                                                                                                                                                                                                                                                                                                                                                                                                                                                                                                                                                                                                                                                                                                                                                                                                                        |
|     | Based on the location of the frog, and the way its skin can change to brown, much like clouds and storms ( <i>tempesta</i> ) can. Choco for the bio region and the brown colour, and cloud again for the location as well as the way it can change its skin colour.                                                                                                                                                                                                                                                                                                                                                                                                                                                                                                                                                                                                                                                                          |

 = Winner  
 = Runner-Up  
 = Contributor  
 = Finalist  
 = Semi-Finalist  
 = Special Recognition  
 = Science & Research Award  
 = Creativity Award  
 = Inspiring Conservation Award  
 = Junior Scientist Award (12 & under)

## Species Naming Competition Full List of Entries

|     |                                                                                                                                                                                                                                                                                                                                                                                                                                                                                                                                                                                                                                                                                                                                                                                                                                                                                                                                                                     |
|-----|---------------------------------------------------------------------------------------------------------------------------------------------------------------------------------------------------------------------------------------------------------------------------------------------------------------------------------------------------------------------------------------------------------------------------------------------------------------------------------------------------------------------------------------------------------------------------------------------------------------------------------------------------------------------------------------------------------------------------------------------------------------------------------------------------------------------------------------------------------------------------------------------------------------------------------------------------------------------|
| 554 | <b>Trident Frog</b> <i>Hyloscirtus Sphaera</i>   Sruthi Gurudev, 22, USA                                                                                                                                                                                                                                                                                                                                                                                                                                                                                                                                                                                                                                                                                                                                                                                                                                                                                            |
|     | I chose the name Trident Frog because the angles and lines created by its body are somewhat reminiscent of a trident's shape. "The v shape" of its head, the bend of its legs, and the outline created by the 3-4 pronged fingers that the frog has. I chose <i>Hyloscirtus Sphaera</i> because <i>sphaera</i> means sphere in Latin, which indicates the frog's fingers are distinctly rounded.                                                                                                                                                                                                                                                                                                                                                                                                                                                                                                                                                                    |
| 555 | <b>Artemis</b>   Stefania Solomon, 14, Romania ●                                                                                                                                                                                                                                                                                                                                                                                                                                                                                                                                                                                                                                                                                                                                                                                                                                                                                                                    |
|     | Artemis is the goddess of nature, proving that she is strong regardless of appearances.                                                                                                                                                                                                                                                                                                                                                                                                                                                                                                                                                                                                                                                                                                                                                                                                                                                                             |
| 556 | <b>Ecuadorian Colored Frog</b> <i>Hyloscirtus color mutatio</i>   Stefano Montano, 16, Dominican Republic                                                                                                                                                                                                                                                                                                                                                                                                                                                                                                                                                                                                                                                                                                                                                                                                                                                           |
|     | The reason I chose the name Ecuadorian Colored frog is because the frog was discovered in Carchi province, Ecuador, in the county of Tulcán and near the town of El Chical. Currently, the place it was discovered in is the only known place it resides hence I wrote Ecuadorian as part of the name. The reason I chose colored to be part of the name is because what makes the frog so unique is its color. More specifically that it is the only known frog that is able to change colors like an Iguana. The skin of the frog changes color and acts as camouflage providing protection to the frog. So that it can blend into the environment and be less recognizable to other predators it changes colors adapting to the environment around it. Because of these two reasons is why I called it Ecuadorian Colored Frog. I Chose <i>Hyloscirtus color mutatio</i> because <i>color mutatio</i> means color change which is what makes the frog so unique. |
| 557 | <b>Bosco</b>   Stella (Bancroft ES) Ruf, 10, USA ● ●                                                                                                                                                                                                                                                                                                                                                                                                                                                                                                                                                                                                                                                                                                                                                                                                                                                                                                                |
|     | La rana del bosque                                                                                                                                                                                                                                                                                                                                                                                                                                                                                                                                                                                                                                                                                                                                                                                                                                                                                                                                                  |
| 558 | <b>Mylan frog</b> <i>Hyloscirtus Golondri frog</i>   Stephanie McGovern, 16, Canada                                                                                                                                                                                                                                                                                                                                                                                                                                                                                                                                                                                                                                                                                                                                                                                                                                                                                 |
|     | Looking at the pictures of the frog I would name it mylan if it was my pet and the scientific name because one of the places starts with golondri and it's sounds cool                                                                                                                                                                                                                                                                                                                                                                                                                                                                                                                                                                                                                                                                                                                                                                                              |
| 559 | <b>The Round Fingertips Frog</b> <i>Circum Digitus</i>   Steven Carbajal, 14, USA                                                                                                                                                                                                                                                                                                                                                                                                                                                                                                                                                                                                                                                                                                                                                                                                                                                                                   |
|     | I chose this name because the thing that stands the most out of the frog for me is its fingertips which are round. It is the first thing I see when looking at the frog, so I decided to pick that name. However, I was debating between naming it the popout eyes frog because the eyes are very noticeable.                                                                                                                                                                                                                                                                                                                                                                                                                                                                                                                                                                                                                                                       |
| 560 | <b>Froakie</b> <i>Hylocirtus Froakus</i>   Sulaiman Butt, 21, United Kingdom                                                                                                                                                                                                                                                                                                                                                                                                                                                                                                                                                                                                                                                                                                                                                                                                                                                                                        |
|     | Because im 21 and love the pokemon called froakie which this frog resembles                                                                                                                                                                                                                                                                                                                                                                                                                                                                                                                                                                                                                                                                                                                                                                                                                                                                                         |
| 561 | <b>Viridi</b> <i>Hylocirtus ortus</i>   Suman J B, 25, India                                                                                                                                                                                                                                                                                                                                                                                                                                                                                                                                                                                                                                                                                                                                                                                                                                                                                                        |
|     | Viridi - in latin it's Green ortus - Begining                                                                                                                                                                                                                                                                                                                                                                                                                                                                                                                                                                                                                                                                                                                                                                                                                                                                                                                       |
| 562 | <b>Khaki</b> <i>Kahkahuna</i>   Sydney Westphal, 11, America ●                                                                                                                                                                                                                                                                                                                                                                                                                                                                                                                                                                                                                                                                                                                                                                                                                                                                                                      |
|     | I chose it because it means brown and there are many brown spots on the frog. I also think it's really cute                                                                                                                                                                                                                                                                                                                                                                                                                                                                                                                                                                                                                                                                                                                                                                                                                                                         |
| 563 | <b>Bark Frog</b>   T Merino, 20, American-Indian                                                                                                                                                                                                                                                                                                                                                                                                                                                                                                                                                                                                                                                                                                                                                                                                                                                                                                                    |
|     | I chose this name because it looks like a piece of bark and it's lives in trees                                                                                                                                                                                                                                                                                                                                                                                                                                                                                                                                                                                                                                                                                                                                                                                                                                                                                     |
| 564 | <b>The Bubble Torrent Frog</b>   Taavi Coomer, 18, USA ●                                                                                                                                                                                                                                                                                                                                                                                                                                                                                                                                                                                                                                                                                                                                                                                                                                                                                                            |
|     | The frogs' round fingertips distinguish it from similar species so I figured a name relating to that would be important. Bubble also goes with the streams they live by.                                                                                                                                                                                                                                                                                                                                                                                                                                                                                                                                                                                                                                                                                                                                                                                            |
| 565 | <b>Cloud-hopper glassfrog</b> <i>Nubilum</i>   Tabitha Whitehouse, 15, United Kingdom ● ●                                                                                                                                                                                                                                                                                                                                                                                                                                                                                                                                                                                                                                                                                                                                                                                                                                                                           |
|     | 'Cloud-hopper' is inspired by the frog's cloud forest home and I thought the image of a frog hopping between clouds was magical. The word <i>nubilum</i> means cloudy in Latin.                                                                                                                                                                                                                                                                                                                                                                                                                                                                                                                                                                                                                                                                                                                                                                                     |
| 566 | <b>verdemar</b> <i>batrakheios viridi</i>   tais Benitez, Unspecified, ecuador                                                                                                                                                                                                                                                                                                                                                                                                                                                                                                                                                                                                                                                                                                                                                                                                                                                                                      |
|     | por que esta rana tiene unos hermosos tipos de verde                                                                                                                                                                                                                                                                                                                                                                                                                                                                                                                                                                                                                                                                                                                                                                                                                                                                                                                |
| 567 | <b>Speckled Leaf Torrent Frog</b>   Talia Romanelli, 10, Canada ● ●                                                                                                                                                                                                                                                                                                                                                                                                                                                                                                                                                                                                                                                                                                                                                                                                                                                                                                 |
|     | I chose the this name because the male has speckles, and the female is the colour of a green leaf, and the frog is a torrent frog.                                                                                                                                                                                                                                                                                                                                                                                                                                                                                                                                                                                                                                                                                                                                                                                                                                  |
| 568 | <b>Leaf hill frog</b> <i>Herby dapyllil</i>   Tamanna Menda, 23, Indian                                                                                                                                                                                                                                                                                                                                                                                                                                                                                                                                                                                                                                                                                                                                                                                                                                                                                             |
|     | It's found in leaves and is like a lily pad on it.                                                                                                                                                                                                                                                                                                                                                                                                                                                                                                                                                                                                                                                                                                                                                                                                                                                                                                                  |

 = Winner  
 = Runner-Up  
 = Contributor  
 = Finalist  
 = Semi-Finalist  
 = Special Recognition  
 = Science & Research Award  
 = Creativity Award  
 = Inspiring Conservation Award  
 = Junior Scientist Award (12 & under)

## Species Naming Competition Full List of Entries

|     |                                                                                                                                                                                                                                                                                                                                                                                                                                                                                                                                                                                                                                                                                                                                                                                                                                                                                                                                                                                                                                                                                                                              |
|-----|------------------------------------------------------------------------------------------------------------------------------------------------------------------------------------------------------------------------------------------------------------------------------------------------------------------------------------------------------------------------------------------------------------------------------------------------------------------------------------------------------------------------------------------------------------------------------------------------------------------------------------------------------------------------------------------------------------------------------------------------------------------------------------------------------------------------------------------------------------------------------------------------------------------------------------------------------------------------------------------------------------------------------------------------------------------------------------------------------------------------------|
| 569 | <b>Tsuyu</b>   Tanner Graves, 22, USA                                                                                                                                                                                                                                                                                                                                                                                                                                                                                                                                                                                                                                                                                                                                                                                                                                                                                                                                                                                                                                                                                        |
|     | Tsuyu Asui is a fictional character in the My Hero Academia manga/anime. She has powers similar to a frog                                                                                                                                                                                                                                                                                                                                                                                                                                                                                                                                                                                                                                                                                                                                                                                                                                                                                                                                                                                                                    |
| 570 | <b>Spotted cloud frog</b> <i>Maculosus nubis ranae</i>   Tanya Swart, 16, South Africa ●                                                                                                                                                                                                                                                                                                                                                                                                                                                                                                                                                                                                                                                                                                                                                                                                                                                                                                                                                                                                                                     |
|     | If you look at the frog , it has small dots all over it's body and since it was found in a cloud forest I thought it would be a good idea to add cloud to its name.                                                                                                                                                                                                                                                                                                                                                                                                                                                                                                                                                                                                                                                                                                                                                                                                                                                                                                                                                          |
| 571 | <b>Ecuadorian Tree Frog</b>   Taylor Russell, 11, Canada ●                                                                                                                                                                                                                                                                                                                                                                                                                                                                                                                                                                                                                                                                                                                                                                                                                                                                                                                                                                                                                                                                   |
|     | I chose this because it is from Ecuador and it is part of the tree frog family.                                                                                                                                                                                                                                                                                                                                                                                                                                                                                                                                                                                                                                                                                                                                                                                                                                                                                                                                                                                                                                              |
| 572 | <b>Ecuadorian Spotted Tree Frog</b>   Taylor Russell, 11, Canada ●                                                                                                                                                                                                                                                                                                                                                                                                                                                                                                                                                                                                                                                                                                                                                                                                                                                                                                                                                                                                                                                           |
|     | I chose it because it has yellow and black spots. It is from Ecuador and it is part of the tree frog family.                                                                                                                                                                                                                                                                                                                                                                                                                                                                                                                                                                                                                                                                                                                                                                                                                                                                                                                                                                                                                 |
| 573 | <b>Ecuadorian Chirping Tree Frog</b>   Taylor Russell, 11, Canada ●                                                                                                                                                                                                                                                                                                                                                                                                                                                                                                                                                                                                                                                                                                                                                                                                                                                                                                                                                                                                                                                          |
|     | I chose it because it has a chirping sound.                                                                                                                                                                                                                                                                                                                                                                                                                                                                                                                                                                                                                                                                                                                                                                                                                                                                                                                                                                                                                                                                                  |
| 574 | <b>Star Blanket Torrent Frog</b>   Tazabella Jenkins, 24, USA ● ●                                                                                                                                                                                                                                                                                                                                                                                                                                                                                                                                                                                                                                                                                                                                                                                                                                                                                                                                                                                                                                                            |
|     | My first thought of this frog was that it looked like it was wearing a cape or blanket of cinnamon colored stars. I waited over a week to see if I could think of something better, but the star blanket stayed with me! I love thinking about a little frog living in a cloud forest, tucked under a blanket of stars. I'm not confident in my specific epithet idea so I left it blank.                                                                                                                                                                                                                                                                                                                                                                                                                                                                                                                                                                                                                                                                                                                                    |
| 575 | <b>Choco cloud eyed torrent frog</b>   Tejveer Brar, 10, Kenya ● ● ●                                                                                                                                                                                                                                                                                                                                                                                                                                                                                                                                                                                                                                                                                                                                                                                                                                                                                                                                                                                                                                                         |
|     | It is from choco cloud forest and its eye color is like chocolate and it is a torrent frog                                                                                                                                                                                                                                                                                                                                                                                                                                                                                                                                                                                                                                                                                                                                                                                                                                                                                                                                                                                                                                   |
| 576 | <b>Water Slayer</b>   Tessa Sierra Price, 6, USA ●                                                                                                                                                                                                                                                                                                                                                                                                                                                                                                                                                                                                                                                                                                                                                                                                                                                                                                                                                                                                                                                                           |
|     | Because they're sticky                                                                                                                                                                                                                                                                                                                                                                                                                                                                                                                                                                                                                                                                                                                                                                                                                                                                                                                                                                                                                                                                                                       |
| 577 | <b>Green Jumper Frog</b>   Theadora Georgakopoulos, 8, USA ●                                                                                                                                                                                                                                                                                                                                                                                                                                                                                                                                                                                                                                                                                                                                                                                                                                                                                                                                                                                                                                                                 |
|     | I chose this name because it's green and it jumps.                                                                                                                                                                                                                                                                                                                                                                                                                                                                                                                                                                                                                                                                                                                                                                                                                                                                                                                                                                                                                                                                           |
| 578 | <b>Kratts</b>   Theo Hennigar, 7, USA ●                                                                                                                                                                                                                                                                                                                                                                                                                                                                                                                                                                                                                                                                                                                                                                                                                                                                                                                                                                                                                                                                                      |
|     | I think Kratts is a good name because Wild Kratts help animals that need help. The wild Kratts are Chris and Martin and they are people who go into nature who find animals.                                                                                                                                                                                                                                                                                                                                                                                                                                                                                                                                                                                                                                                                                                                                                                                                                                                                                                                                                 |
| 579 | <b>incolorin</b> <i>Hemidactylus hyalinae</i>   theo pacheco, 11, ecuador ●                                                                                                                                                                                                                                                                                                                                                                                                                                                                                                                                                                                                                                                                                                                                                                                                                                                                                                                                                                                                                                                  |
|     | por su poca cantidad de colores                                                                                                                                                                                                                                                                                                                                                                                                                                                                                                                                                                                                                                                                                                                                                                                                                                                                                                                                                                                                                                                                                              |
| 580 | <b>The Cambio Matter Frog</b> <i>Hylocirtus mutateria</i>   Theo Huynh, 15, Australia ● ● ●                                                                                                                                                                                                                                                                                                                                                                                                                                                                                                                                                                                                                                                                                                                                                                                                                                                                                                                                                                                                                                  |
|     | The word "cambio" in Spanish means change and I think currently there are a lot of changes going on in the world, whether it be for better or for worse. But I also wanted to reference the frog having the ability to camouflage and change it's own skin colour! I also chose Spanish given the location the frog is found. Additionally, I wanted to add "matter" into the name because again, currently I think we're all realising how much certain things matter to us, whether it be family, work, mental health, etc. I truly think something as lovely as a frog to be called something that reminds us no matter how much things are changing, to hold onto what matters to us most is just a very nice sentiment. Us youth have the ability to make change everyday for what matters and in the future when maybe a school student comes across this frog on the internet and finds out the origin of it's name, they will feel inspired to make change for what matters to them just like we are now. The scientific name is a mix of the Latin words "mutatio" meaning "change" and "materia" meaning "matter". |
| 581 | <b>Green Frog of Amphibians</b> <i>Viridi Rana Auten Amphibiorium</i>   Therese Mammen, 11, USA ●                                                                                                                                                                                                                                                                                                                                                                                                                                                                                                                                                                                                                                                                                                                                                                                                                                                                                                                                                                                                                            |
|     | I chose this nam because I wanted to have a common name which is hopefully not used.                                                                                                                                                                                                                                                                                                                                                                                                                                                                                                                                                                                                                                                                                                                                                                                                                                                                                                                                                                                                                                         |
| 582 | <b>Brown eyed frog</b> <i>Carchi luscus brunneis ranae</i>   Thierry Jansen op de Haar, 18, The Netherlands                                                                                                                                                                                                                                                                                                                                                                                                                                                                                                                                                                                                                                                                                                                                                                                                                                                                                                                                                                                                                  |
|     | Well its found in Carchi, and its regonizable because of his brown eyes :) (entered this "naming competition" for fun) may the best one win!                                                                                                                                                                                                                                                                                                                                                                                                                                                                                                                                                                                                                                                                                                                                                                                                                                                                                                                                                                                 |

 = Winner  
 = Runner-Up  
 = Contributor  
 = Finalist  
 = Semi-Finalist  
 = Special Recognition  
 = Science & Research Award  
 = Creativity Award  
 = Inspiring Conservation Award  
 = Junior Scientist Award (12 & under)



## Species Naming Competition Full List of Entries

|     |                                                                                                                                                                                                                                                                                                                                                                                                                                                         |
|-----|---------------------------------------------------------------------------------------------------------------------------------------------------------------------------------------------------------------------------------------------------------------------------------------------------------------------------------------------------------------------------------------------------------------------------------------------------------|
| 583 | <b>Adamczewski Frog</b>   Thomas Hodges, 17, USA                                                                                                                                                                                                                                                                                                                                                                                                        |
|     | Theres a guy named Saul Adamczewski, he is in a band and a very talented musician. I think it would be really funny if there was a frog named after him because he kinda looks like a frog anyway and I'm about 99% sure he has eaten a fly at LEAST once.                                                                                                                                                                                              |
| 584 | <b>Tulcan Chameleon Frog</b> <i>Hyloscirtus hyrdopandemustandem</i>   Tima Shani, 10, Kenya ●●                                                                                                                                                                                                                                                                                                                                                          |
|     | 2020 hasn't been the best year but we were able to discover a new frog species and it shows that the earth is growing strong                                                                                                                                                                                                                                                                                                                            |
| 585 | <b>Crystal Pear Frog</b> <i>Pirum crystal ranam</i>   Tionna Gay, 16, America                                                                                                                                                                                                                                                                                                                                                                           |
|     | I chose this as I immediately recognized it looked like another species of the Glass Frog resulting in me thinking of 'Crystal'. Then it's small spots and light green to dark green near brown color change reminded me of the different pears resulting the 'Pear' part. I think this name fits this species of frog well.                                                                                                                            |
| 586 | <b>The Thurnberg torrent frog</b> <i>Hylis cacho</i>   Tomasz Clark, 14, United Kingdom ●                                                                                                                                                                                                                                                                                                                                                               |
|     | I chose it's common name after someone who is fighting very hard to protect it and many other species around the globe I also believe that her contribution to conservation will inspire many more people to work to protect its frog. The latin name was chosen as it is endemic to this specific region of Venezuela so therefore would make most sense as it can be found no where else.                                                             |
| 587 | <b>Pepe</b>   Tommy Wilcox, 20, England                                                                                                                                                                                                                                                                                                                                                                                                                 |
|     | Funny                                                                                                                                                                                                                                                                                                                                                                                                                                                   |
| 588 | <b>The Uptown Funk Frog</b>   Toni North, 14, USA                                                                                                                                                                                                                                                                                                                                                                                                       |
|     | I called this frog the Uptown Funk frog because this frog is very different. It doesn't have hands like its other tree frog cousins, and also has the skin similar to a chameleon. Who doesn't love something that is different from the usual? Maybe a little bit...funky! So I named the frog after Mark Ronson's "Uptown Funk" ft. Bruno Mars, because that was the first thing that came to mind when I thought of a name. Also, I love Bruno Mars! |
| 589 | <b>Starfruit torrent frog</b> <i>stella</i>   Toon Xuan Poh, 24, Singapore ●                                                                                                                                                                                                                                                                                                                                                                            |
|     | The sexual dimorphism as well as different camouflage states greatly resemble a ripening starfruit! From pale green, to yellow streaks, to brown spots. The smooth texture of a starfruit resembles that of a frog too. Decided to use 'star' ('stella' in latin) as the specific epithet as this frog is literally a star in the spotlight for forest restoration!                                                                                     |
| 590 | <b>Torinqui torrenteer frog</b> <i>Hyloscirtus torinqui</i>   Torin Atkinson, 13, United kingdom ●                                                                                                                                                                                                                                                                                                                                                      |
|     | I chose the torenteer part of the name due to its relation to the mashpi torrenteer frog, and the torinqui part means "torrent in Quito" because it was found near Quito                                                                                                                                                                                                                                                                                |
| 591 | <b>Coloured Leaf</b> <i>Hyloscirtus color</i>   Torrin Stitt, 7, England ●                                                                                                                                                                                                                                                                                                                                                                              |
|     | We had a class vote about what the best name for this frog would be.                                                                                                                                                                                                                                                                                                                                                                                    |
| 592 | <b>Three Beeper</b> <i>ThreeBeeper Frogtoous</i>   Tylah Pace, 14, USA                                                                                                                                                                                                                                                                                                                                                                                  |
|     | I chose this name because this frog's noise is beeps and it beeps 3 times.                                                                                                                                                                                                                                                                                                                                                                              |
| 593 | <b>Bluie</b>   Tyler Fall, 6, USA ●                                                                                                                                                                                                                                                                                                                                                                                                                     |
|     | I like the name because it is a cute name and the frog is cute.                                                                                                                                                                                                                                                                                                                                                                                         |
| 594 | <b>Kermit</b>   Tyler Meade, 8, USA ●                                                                                                                                                                                                                                                                                                                                                                                                                   |
|     | Because This frog looks like Kermit the Frog from "The Muppets"                                                                                                                                                                                                                                                                                                                                                                                         |
| 595 | <b>Hip-Hop</b> <i>Hyloscirtus mashpi</i>   Tyler Roach, 14, USA                                                                                                                                                                                                                                                                                                                                                                                         |
|     | I chose Hip-Hop as the name for the frog because Hip-Hop is my favorite genre of music and its very catchy, and i think with that as a name of a frog will make people more interested in the frog and want to see it. If I knew a frog was named Hi-Hop I would want to see it to. So that is why its name should be Hip-Hop                                                                                                                           |
| 596 | <b>brown-eyed torrent frog</b> <i>Hyloscirtus brunops</i>   Tyler Greenfield, 20, USA ●                                                                                                                                                                                                                                                                                                                                                                 |
|     | "brunops" is from the Latin brunus/brunneus meaning "brown" and the Greek ops/ophthalmos meaning "eye", in reference to the striking brown eyes of this species.                                                                                                                                                                                                                                                                                        |
| 597 | <b>Hyrodoc</b> <i>Hyrodoc</i>   Unspecified (A) Unspecified (N), 11, Unspecified ●                                                                                                                                                                                                                                                                                                                                                                      |
|     | I chose the name because it sounded nice.                                                                                                                                                                                                                                                                                                                                                                                                               |

 = Winner  
 = Runner-Up  
 = Contributor  
 = Finalist  
 = Semi-Finalist  
 = Special Recognition  
 = Science & Research Award  
 = Creativity Award  
 = Inspiring Conservation Award  
 = Junior Scientist Award (12 & under)

## Species Naming Competition Full List of Entries

|     |                                                                                                                                                                                                                                                                                                                                                                                                                                                                                                                                                                                                                                                                                                                                                                                                                                                                                                         |
|-----|---------------------------------------------------------------------------------------------------------------------------------------------------------------------------------------------------------------------------------------------------------------------------------------------------------------------------------------------------------------------------------------------------------------------------------------------------------------------------------------------------------------------------------------------------------------------------------------------------------------------------------------------------------------------------------------------------------------------------------------------------------------------------------------------------------------------------------------------------------------------------------------------------------|
| 598 | <b>Woody</b> <i>Hyloscirtus woodyea</i>   Valentina Rodas, 14, Ecuador                                                                                                                                                                                                                                                                                                                                                                                                                                                                                                                                                                                                                                                                                                                                                                                                                                  |
|     | Yo elegí el nombre de Woody porque quiero hacer honor a un personaje que marco mi infancia a aquellos momentos felices que no quisiera nunca olvidar, las películas se llaman toy story en total hay 4 y creo yo que todas las personas se la han visto por lo menos una vez en su vida y a todos mis amigos e incluso a jóvenes que ya se han convertido en adultos se sienten muy identificados con esta, en lo personal Woody siempre me dio la esperanza de que mis juguetes algún día cobrarán vida y poder hablarles para no sentirme muy sola, el me enseñó que los amigos verdaderos son para siempre que nunca hay que perder la esperanza porque siempre hay solución, a mí me gustaría mucho que nombren a esa especie como el ídolo de muchos para que nadie nunca lo olvide, siento que a la nueva especie le caería bien este nombre ya que se ve muy amigable y woody era muy agradable. |
| 599 | <b>Español</b> <i>Lesní zába</i>   Valeria Ceín, 9, Ecuador 🇪🇺 🟡                                                                                                                                                                                                                                                                                                                                                                                                                                                                                                                                                                                                                                                                                                                                                                                                                                        |
|     | Porque me párese bonito.                                                                                                                                                                                                                                                                                                                                                                                                                                                                                                                                                                                                                                                                                                                                                                                                                                                                                |
| 600 | <b>Lime Glass Torrent Frog</b>   Veronica Gordivsky, 13, USA 🟢                                                                                                                                                                                                                                                                                                                                                                                                                                                                                                                                                                                                                                                                                                                                                                                                                                          |
|     | I chose this name because the color and design of the frog made me think of limes, and their feet are kinda see through so they made me think of glass, and they are torrent frogs so I chose the name lime glass tree frog for these reasons                                                                                                                                                                                                                                                                                                                                                                                                                                                                                                                                                                                                                                                           |
| 601 | <b>Kermit</b> <i>Hylocirtus marshio</i>   Victor Juarez, 15, USA                                                                                                                                                                                                                                                                                                                                                                                                                                                                                                                                                                                                                                                                                                                                                                                                                                        |
|     | Because I can, nah I'm joking. I chose this name because I like Kermit the frog, plus it would be funny hearing people say the common name. I chose also chose "Hylocirtus marshio" because it just reminds me of the Martian Manhunter.                                                                                                                                                                                                                                                                                                                                                                                                                                                                                                                                                                                                                                                                |
| 602 | <b>Ecuadorian kaleidoscope frog</b>   victoria ingle, 20, British/England                                                                                                                                                                                                                                                                                                                                                                                                                                                                                                                                                                                                                                                                                                                                                                                                                               |
|     | it can change colour just like a kaleidoscope                                                                                                                                                                                                                                                                                                                                                                                                                                                                                                                                                                                                                                                                                                                                                                                                                                                           |
| 603 | <b>Cuttle frog</b> <i>ecuadensis</i>   Victoria Shone, 22, United Kingdom                                                                                                                                                                                                                                                                                                                                                                                                                                                                                                                                                                                                                                                                                                                                                                                                                               |
|     | I chose the name 'Cuttle Frog' as, like the frog, cuttlefish are well known to change their colour to camouflage themselves against their surroundings. I chose 'ecuadensis' as the frog was discovered in Ecuador.                                                                                                                                                                                                                                                                                                                                                                                                                                                                                                                                                                                                                                                                                     |
| 604 | <b>Kiwi Frog</b>   Victoria (Bancroft ES) Tirajoh, 10, USA 🟡                                                                                                                                                                                                                                                                                                                                                                                                                                                                                                                                                                                                                                                                                                                                                                                                                                            |
|     | I chose that name because when they color change, they change from a kiwi green color to what looks like the seeds of the kiwi. And because their fingers are round like the shape of a tiny kiwi.                                                                                                                                                                                                                                                                                                                                                                                                                                                                                                                                                                                                                                                                                                      |
| 605 | <b>X Æ A 12</b> <i>Hylocirtus nubibus</i>   Victoria Celete De Santos, 14, Latin American 🟢                                                                                                                                                                                                                                                                                                                                                                                                                                                                                                                                                                                                                                                                                                                                                                                                             |
|     | I honestly do not know how I came up with this name idea but here it is. I chose this name because I feel like if it was named this it would really grow popular on social media. This would really help spread awareness. It'll also most likely grab the attention of Elon Musk which would be pretty interesting. I thought of nubibus because it is cloud in Latin and that would be a cute reference. It makes sense because their environment is near clouds.                                                                                                                                                                                                                                                                                                                                                                                                                                     |
| 606 | <b>Earth cooler</b> <i>terra frigidior Thracam</i>   Violet Lockwood, 12, USA 🟡                                                                                                                                                                                                                                                                                                                                                                                                                                                                                                                                                                                                                                                                                                                                                                                                                         |
|     | I chose this name because I feel that global warming is a serious thing and we should really think about how her actions affect the world. I think that the more species of animals that we find the more chances we get to fix the problems we have caused.                                                                                                                                                                                                                                                                                                                                                                                                                                                                                                                                                                                                                                            |
| 607 | <b>Camo-frog</b>   Vivian Ellis, 7, USA 🟡                                                                                                                                                                                                                                                                                                                                                                                                                                                                                                                                                                                                                                                                                                                                                                                                                                                               |
|     | I chose this name because it is a camouflaged frog.                                                                                                                                                                                                                                                                                                                                                                                                                                                                                                                                                                                                                                                                                                                                                                                                                                                     |
| 608 | <b>Reins Torrent Frog</b>   Will Wood, 24, UK 🟢 🟠                                                                                                                                                                                                                                                                                                                                                                                                                                                                                                                                                                                                                                                                                                                                                                                                                                                       |
|     | Each generation 'hands over the reins' to the next. With trusts such as Reserva and movements such as the School Climate Strike, the youth of today will use those reins to steer the world into a more environmentally conscious world. Whether they be the youth of Ecuador or youth from the other side of the planet, they all have an important part to play in conserving this frog and countless other species for themselves and all of the generations to follow. As it is to be named by the youth of today, this frog species represents the enormous impact that young people can have on shaping the world once the reins are handed over. Naming the frog after these metaphorical reins will immortalise that message.                                                                                                                                                                   |
| 609 | <b>Striped Cloud Frog</b> <i>Hyloscirtus Nubicola</i>   William Meissner, 10, Canada 🟢 🟡                                                                                                                                                                                                                                                                                                                                                                                                                                                                                                                                                                                                                                                                                                                                                                                                                |
|     | For the common name, I chose "Striped cloud frog" because it has a stripe of dots down it's back. The scientific name has the genus for neotropical frogs and Nubicola means cloud forest.                                                                                                                                                                                                                                                                                                                                                                                                                                                                                                                                                                                                                                                                                                              |

 = Winner  
 = Runner-Up  
 = Contributor  
 = Finalist  
 = Semi-Finalist  
 = Special Recognition  
 = Science & Research Award  
 = Creativity Award  
 = Inspiring Conservation Award  
 = Junior Scientist Award (12 & under)

## Species Naming Competition Full List of Entries

|     |                                                                                                                                                                                                                                                                                                                                                                                                                                                                                                                                                                                                                                                                                                                                                                                                                                                                                                                                                                      |
|-----|----------------------------------------------------------------------------------------------------------------------------------------------------------------------------------------------------------------------------------------------------------------------------------------------------------------------------------------------------------------------------------------------------------------------------------------------------------------------------------------------------------------------------------------------------------------------------------------------------------------------------------------------------------------------------------------------------------------------------------------------------------------------------------------------------------------------------------------------------------------------------------------------------------------------------------------------------------------------|
| 610 | <b>Green Screen Torrent Frog</b> <i>Hyloscirtus viridiscreen</i>   William Diez, 15, Dominican Republic ●                                                                                                                                                                                                                                                                                                                                                                                                                                                                                                                                                                                                                                                                                                                                                                                                                                                            |
|     | The unique name that I chose because I believe that it accurately encapsulates this type of frog is “Hyloscirtus viridiscreen”, otherwise referred to as the “Green Screen Torrent Frog”. To begin with, I chose to add the word “torrent” because of the simple fact that it lives near running water. Now, the interesting part! I also chose to include “green screen” in the torrent frog’s name because, just like the green screens that are used to make movies and change your background, this torrent frog has a base color of green, but depending on its surroundings, it can also adapt and change to a different color or pattern. Not only that, but I also chose this specific name for the frog because it alludes to my life-long passion for film-making and watching/creating movies.                                                                                                                                                            |
| 611 | <b>Frankie Green</b>   Wyatt Smith, 4, USA ●                                                                                                                                                                                                                                                                                                                                                                                                                                                                                                                                                                                                                                                                                                                                                                                                                                                                                                                         |
|     | Because I like them to be all Frankie guys                                                                                                                                                                                                                                                                                                                                                                                                                                                                                                                                                                                                                                                                                                                                                                                                                                                                                                                           |
| 612 | <b>Camo Glass Frog</b> <i>Marcus Tullius</i>   Yasmeen Muir-Gardner, 14, USA                                                                                                                                                                                                                                                                                                                                                                                                                                                                                                                                                                                                                                                                                                                                                                                                                                                                                         |
|     | The first one I just randomly made up the scientific name is my mothers you is a doctor take care of covid patients and a single mom.                                                                                                                                                                                                                                                                                                                                                                                                                                                                                                                                                                                                                                                                                                                                                                                                                                |
| 613 | <b>Río</b>   Yazmin (Bancroft ES) Bernal, 10, USA ●                                                                                                                                                                                                                                                                                                                                                                                                                                                                                                                                                                                                                                                                                                                                                                                                                                                                                                                  |
|     | Elegí este nombre por la zona donde vive.                                                                                                                                                                                                                                                                                                                                                                                                                                                                                                                                                                                                                                                                                                                                                                                                                                                                                                                            |
| 614 | <b>Coco frog</b> <i>Hylocirtus frokiea</i>   Yeimi Sosa, 14, USA                                                                                                                                                                                                                                                                                                                                                                                                                                                                                                                                                                                                                                                                                                                                                                                                                                                                                                     |
|     | I choose coco frog because it lives in the choco area I just removed the H. I also choose to name it Hylocirtus frokiea because when I was younger me and y siblings use to love watching pokemon and there was aa frog looking character named frokie and it was one of my favorite characters so I decided to name.                                                                                                                                                                                                                                                                                                                                                                                                                                                                                                                                                                                                                                                |
| 615 | <b>Chical camouflage</b>   Yolanda Micaela Ortiz Mena, 14, Ecuador ●●                                                                                                                                                                                                                                                                                                                                                                                                                                                                                                                                                                                                                                                                                                                                                                                                                                                                                                |
|     | Yo decidí ponerle a esta rana este nombre debido a que Chical es la parroquia por donde se encuentra y por el cambio de color en su piel, ya que le ayuda a camuflarse y a adaptarse a los cambios que hay en su entorno.                                                                                                                                                                                                                                                                                                                                                                                                                                                                                                                                                                                                                                                                                                                                            |
| 616 | <b>Chical camouflage</b>   Yolanda Micaela Ortiz Mena, 14, Ecuador ●●                                                                                                                                                                                                                                                                                                                                                                                                                                                                                                                                                                                                                                                                                                                                                                                                                                                                                                |
|     | Después de leer toda la información de esta nueva especie se me ocurrió que el nombre perfecto para esta nueva especie es el “Chical camouflage”, yo me decidí por este nombre en base a toda la información que tenía disponible sobre esta especie. La primera parte del nombre “Chical”, la puse en honor a que este es el nombre de una parroquia que se encuentra cerca de la pequeña área de distribución de esta nueva especie. Ya que desde mi punto de vista es importante saber de dónde origina las cosas, en especial un nuevo ser vivo. La segunda parte del nombre es “camouflage”, esta palabra es la traducción de camuflaje de idioma español al inglés, Esta parte le puse en honor a la habilidad que esta tiene para camuflarse con cosas de su entorno, como hojas y árboles. Cabe recalcar que me pareció importante esta característica ya que es una habilidad especial que no todas las especies poseen y esto es lo que le hace ser única. |
| 617 | <b>Chical camuflage</b>   Yolanda Micaela Ortiz Mena, 14, Ecuador ●                                                                                                                                                                                                                                                                                                                                                                                                                                                                                                                                                                                                                                                                                                                                                                                                                                                                                                  |
|     | Por el lugar donde se encuentra esta nueva especie, que es cerca de la parroquia el Chical y por el cambio de color en su piel, ya que esta le permite camuflarse y adaptarse a los cambios de su entorno.                                                                                                                                                                                                                                                                                                                                                                                                                                                                                                                                                                                                                                                                                                                                                           |
| 618 | <b>Jughead frog</b> <i>Hylocirtus Jughead</i>   Za’Naya York, 15, USA                                                                                                                                                                                                                                                                                                                                                                                                                                                                                                                                                                                                                                                                                                                                                                                                                                                                                                |
|     | I chose this name after one of my favorite Riverdale characters.                                                                                                                                                                                                                                                                                                                                                                                                                                                                                                                                                                                                                                                                                                                                                                                                                                                                                                     |
| 619 | <b>kool frog</b> <i>koolis froogis</i>   Zaaven Piels, 13, Canada                                                                                                                                                                                                                                                                                                                                                                                                                                                                                                                                                                                                                                                                                                                                                                                                                                                                                                    |
|     | Cause I want to                                                                                                                                                                                                                                                                                                                                                                                                                                                                                                                                                                                                                                                                                                                                                                                                                                                                                                                                                      |
| 620 | <b>guagua torrent frog</b> <i>Hyloscirtus guagua</i>   Zane Libke, 22, USA ●●●                                                                                                                                                                                                                                                                                                                                                                                                                                                                                                                                                                                                                                                                                                                                                                                                                                                                                       |
|     | “guagua” is the Kichwa word for “baby” or “young one”. The name honors ReservaYLT’s mission in giving young people a voice in the climate crisis, as well as the indigenous heritage of Ecuador through the use of the kichwa word.                                                                                                                                                                                                                                                                                                                                                                                                                                                                                                                                                                                                                                                                                                                                  |
| 621 | <b>Big-eyed Spotted Frog</b>   Zaria Dixon, 8, USA ●                                                                                                                                                                                                                                                                                                                                                                                                                                                                                                                                                                                                                                                                                                                                                                                                                                                                                                                 |
|     | I chose this name because it has big eyes and spots.                                                                                                                                                                                                                                                                                                                                                                                                                                                                                                                                                                                                                                                                                                                                                                                                                                                                                                                 |
| 622 | <b>Brown-Eyed Tree Frog</b> <i>Brenopus Folius-Amphibus</i>   Zion Thomas, Unspecified, USA                                                                                                                                                                                                                                                                                                                                                                                                                                                                                                                                                                                                                                                                                                                                                                                                                                                                          |
|     | I chose this name because this frog looks like a red-eyed tree frog, except it has brown eyes.                                                                                                                                                                                                                                                                                                                                                                                                                                                                                                                                                                                                                                                                                                                                                                                                                                                                       |

 = Winner  
 = Runner-Up  
 = Contributor  
 = Finalist  
 = Semi-Finalist  
 = Special Recognition  
 = Science & Research Award  
 = Creativity Award  
 = Inspiring Conservation Award  
 = Junior Scientist Award (12 & under)
